# Supplementary material for: Nicotinic Acid-Mediated Modulation of Metastasis-Associated Protein 1 Methylation and Inflammation in Brain Arteriovenous Malformation
Source: MDPI journal article supplement (doi:10.3390/biom13101495), 2023-10-08

MTA1

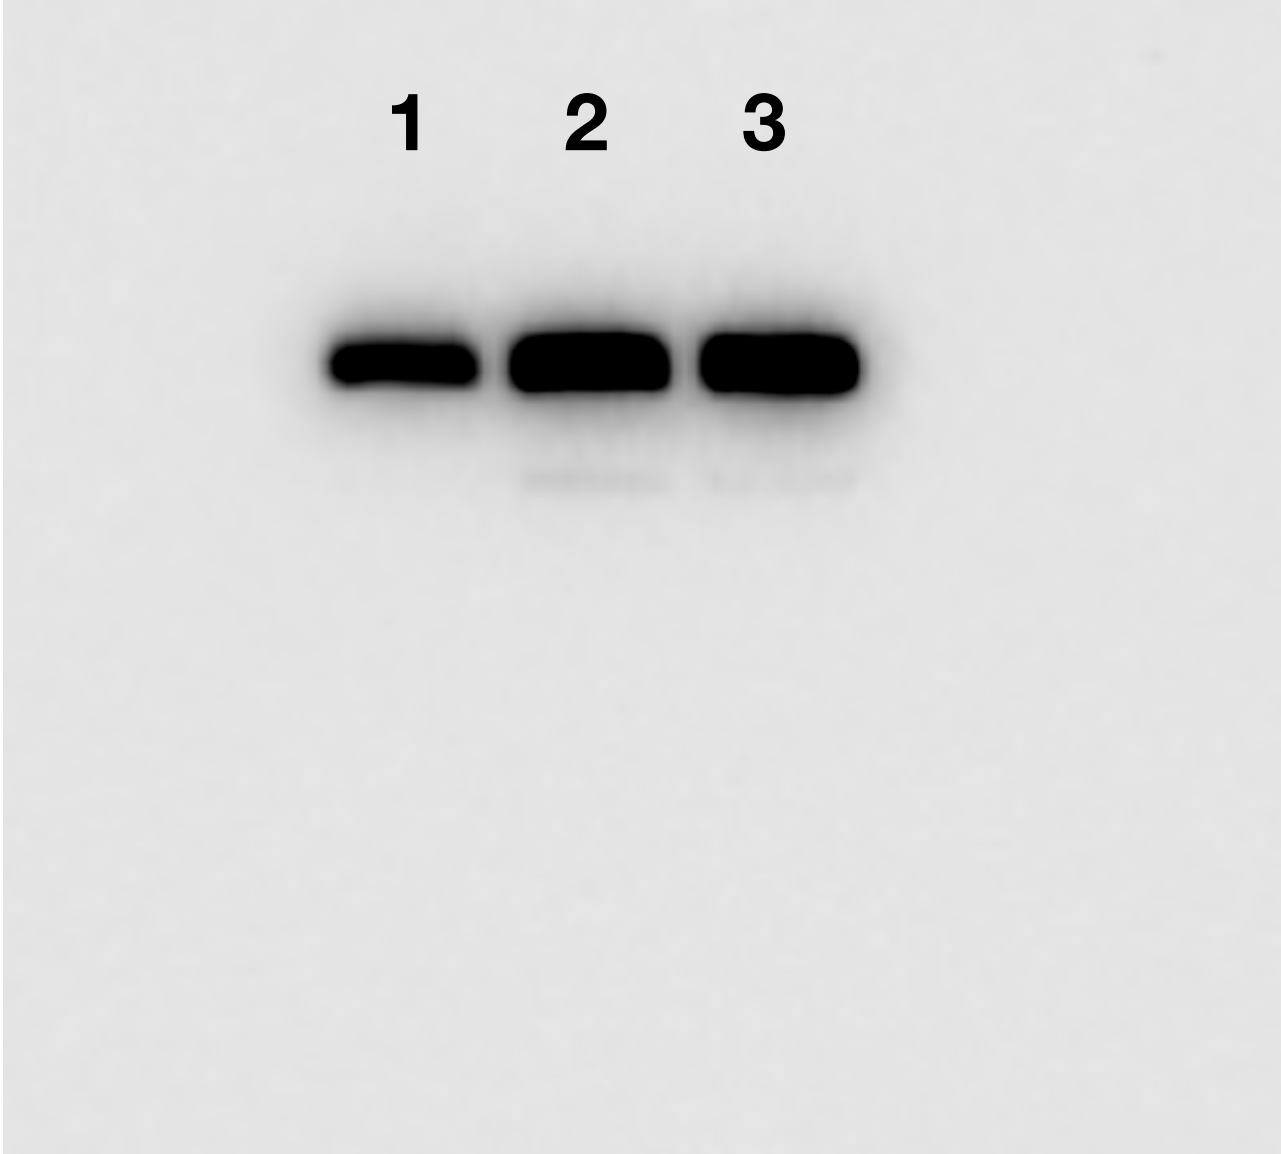

$\beta$ -actin

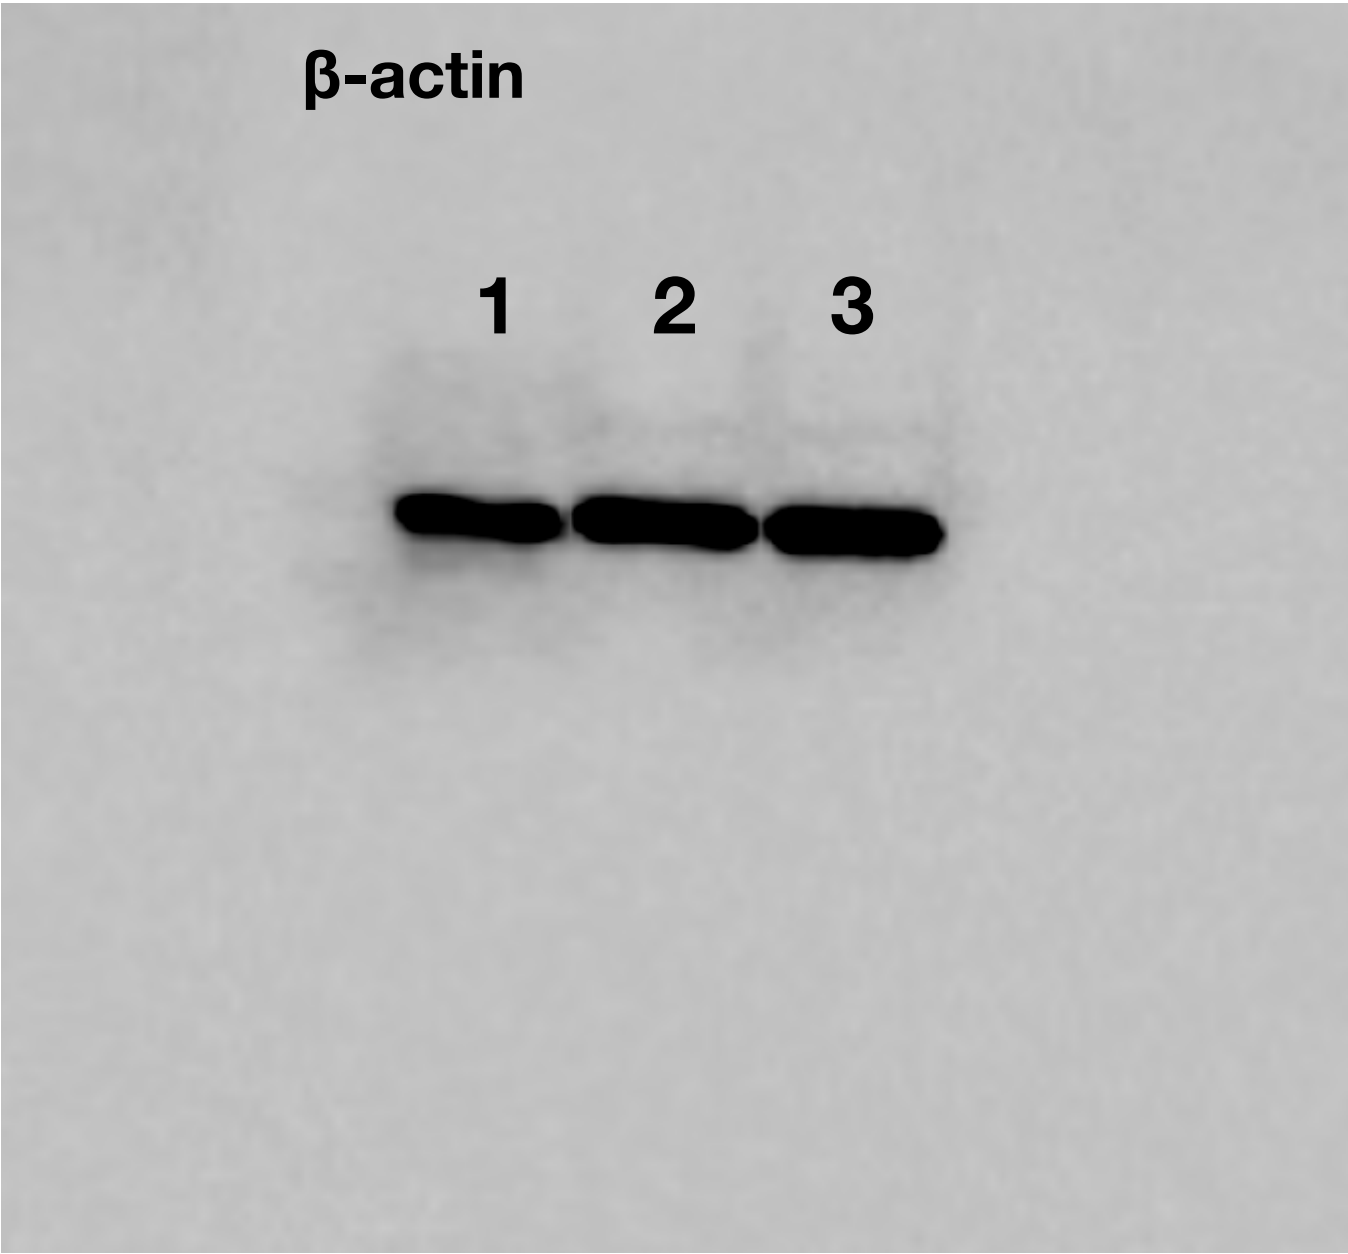

Western blot original bands  
from Figure 5F, Group 1  
bands used for analysis

- 1 Control
- 2 2 $\mu$ M
- 3 4 $\mu$ M

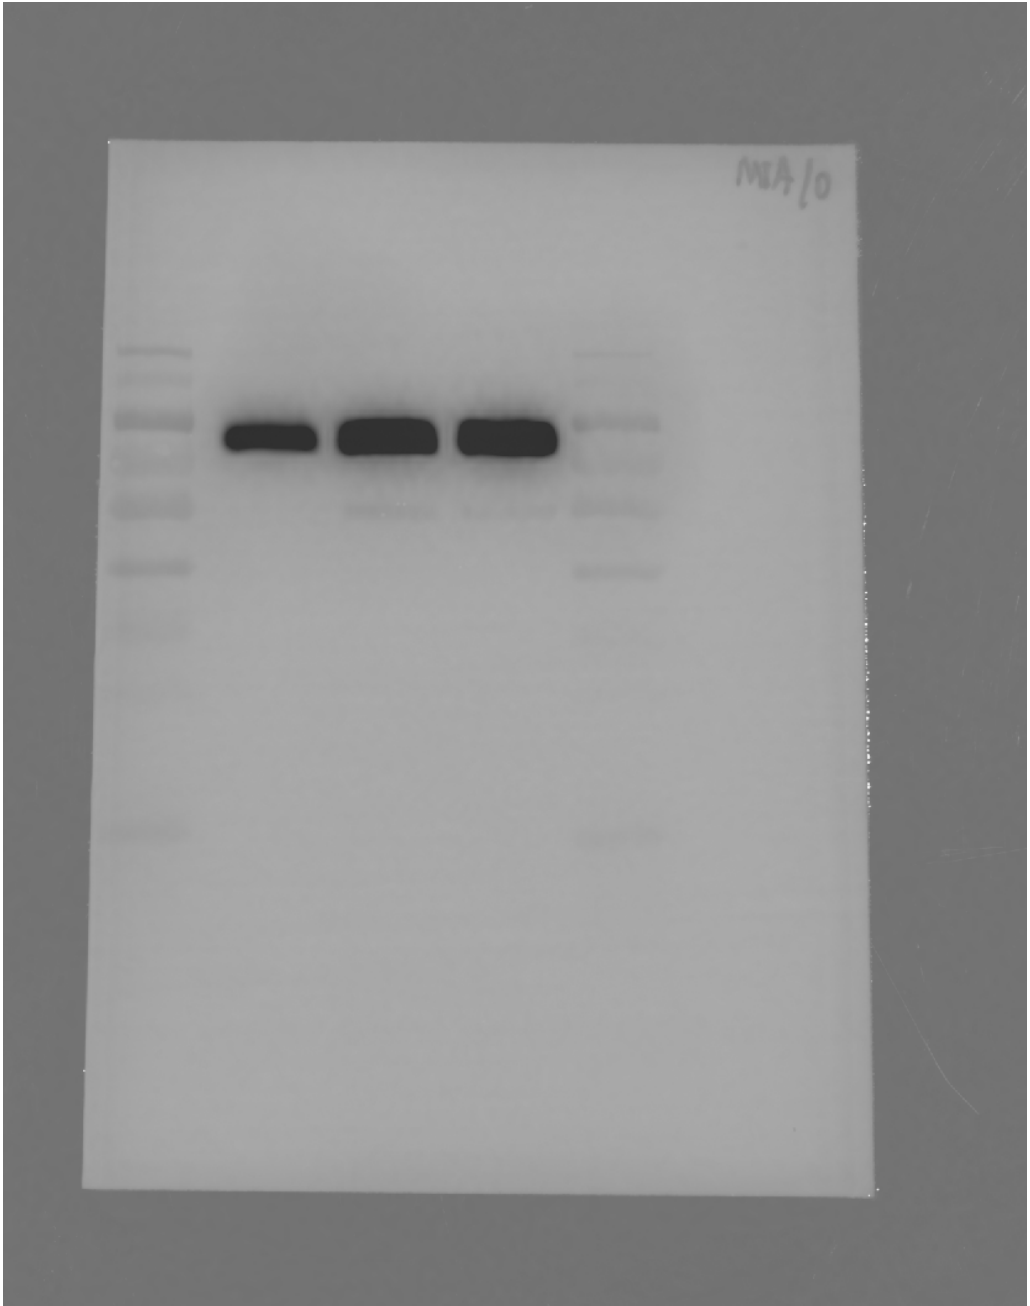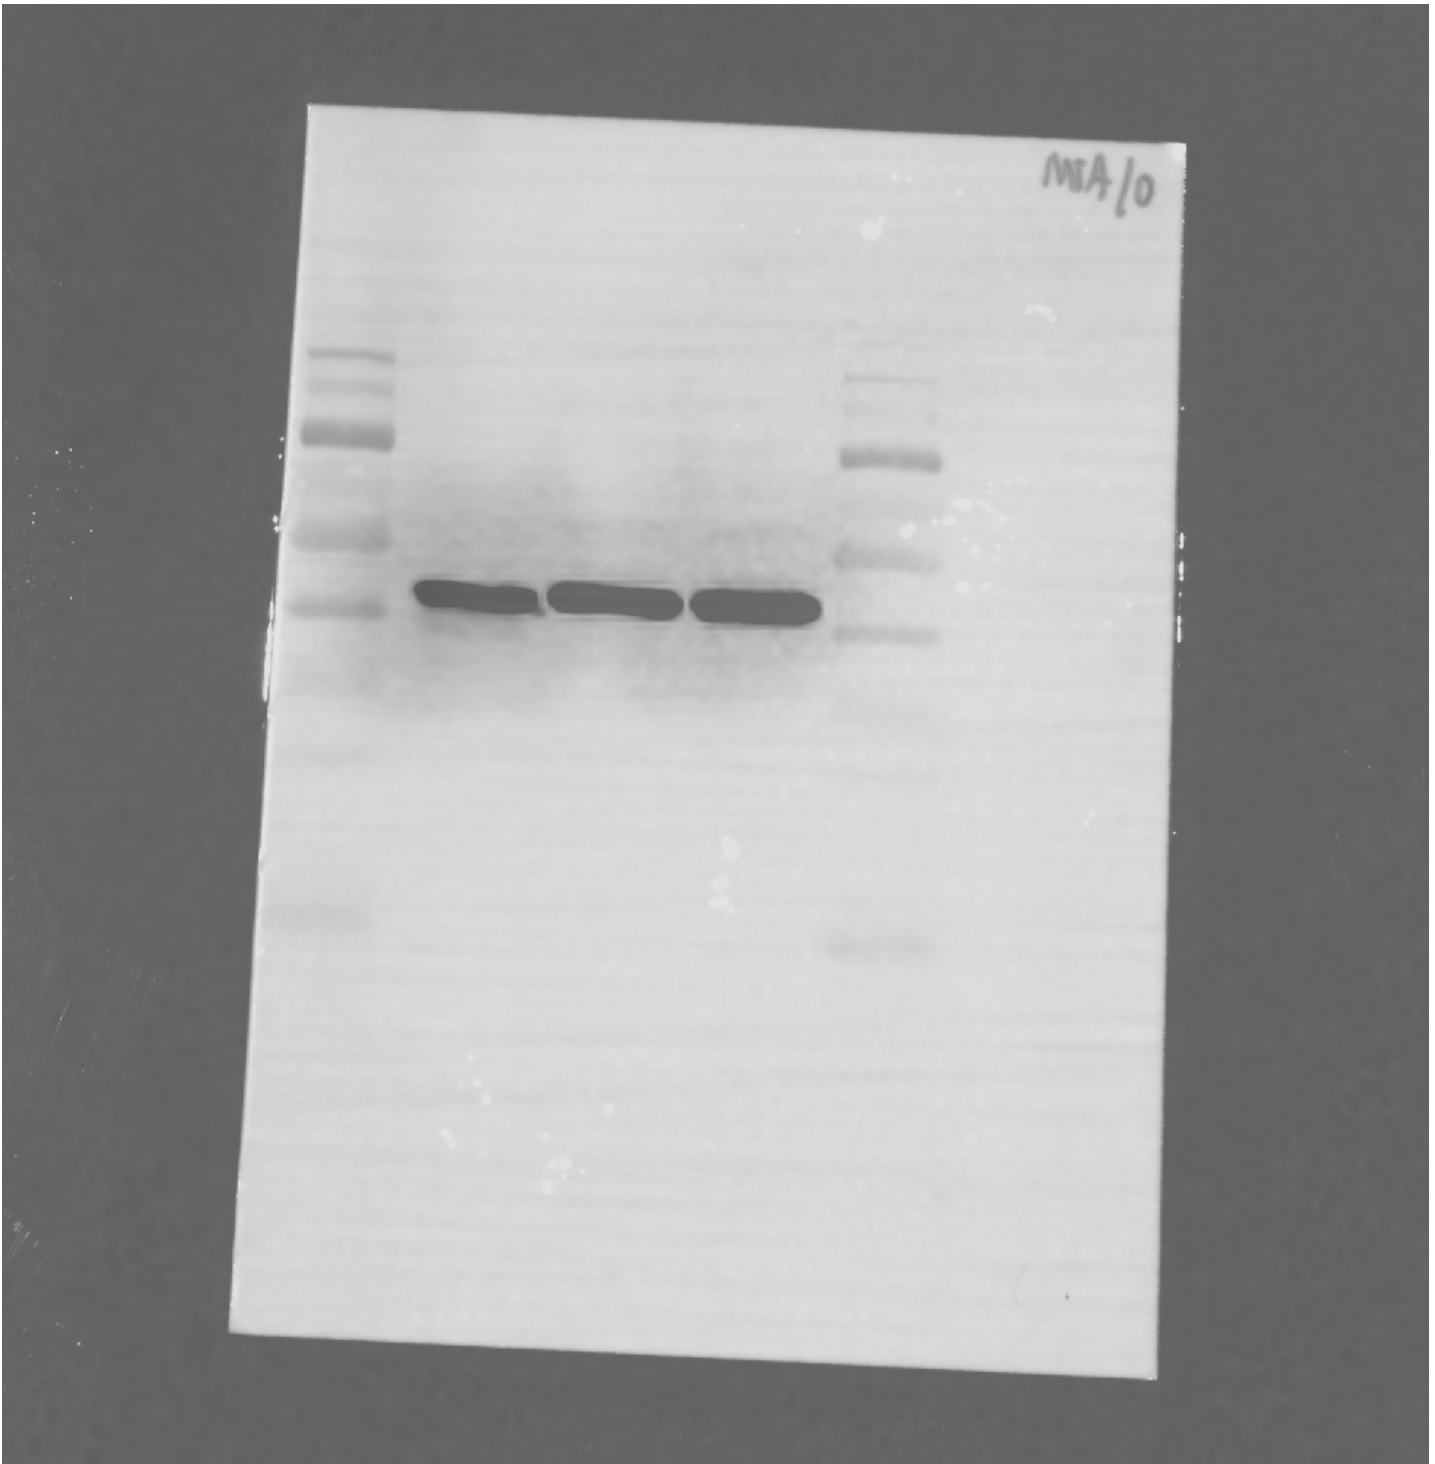

MTA1

1

2

3

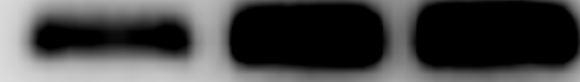

β-actin

1

2

3

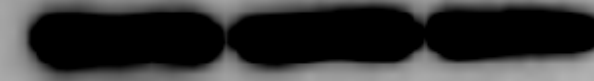

Western blot original bands  
from Figure 5F, Group 2  
bands used for analysis

1 Control

2 2μM

3 4μM

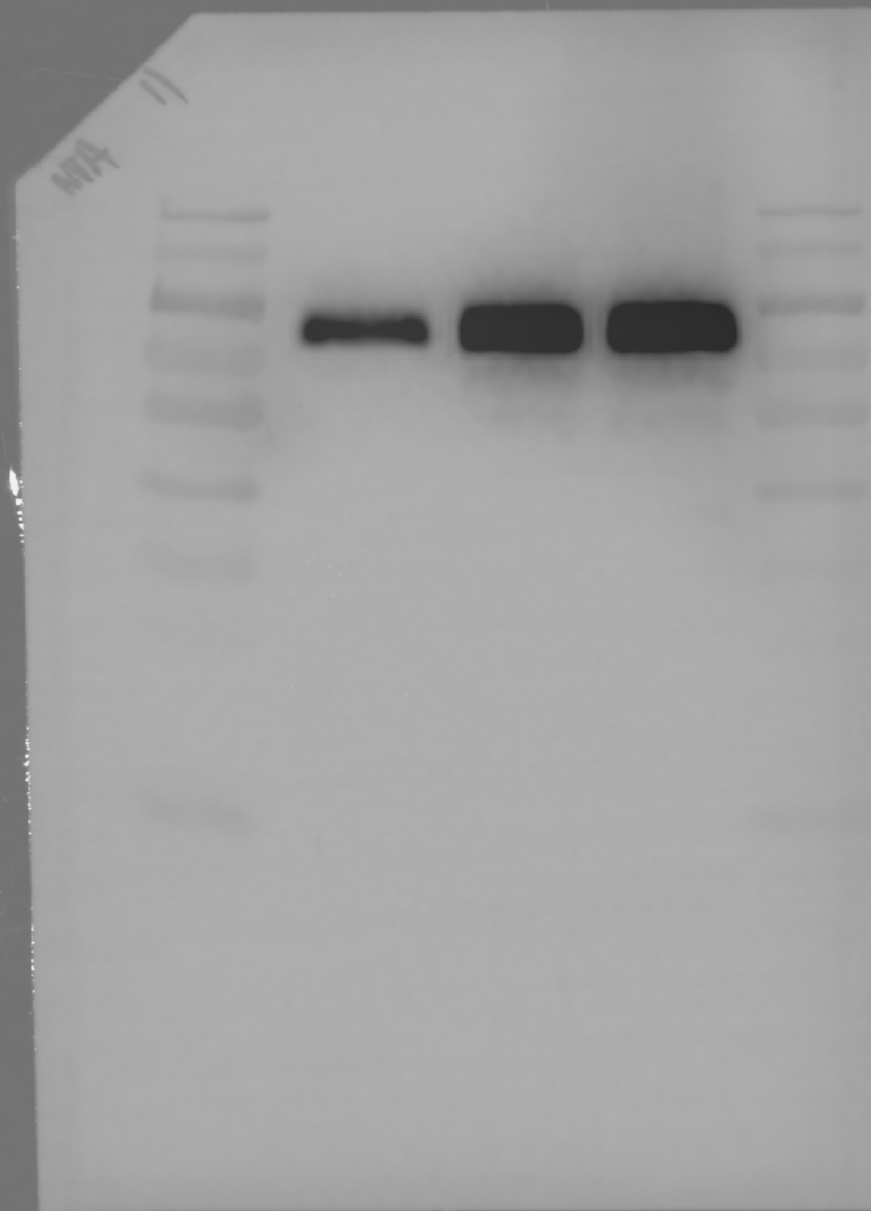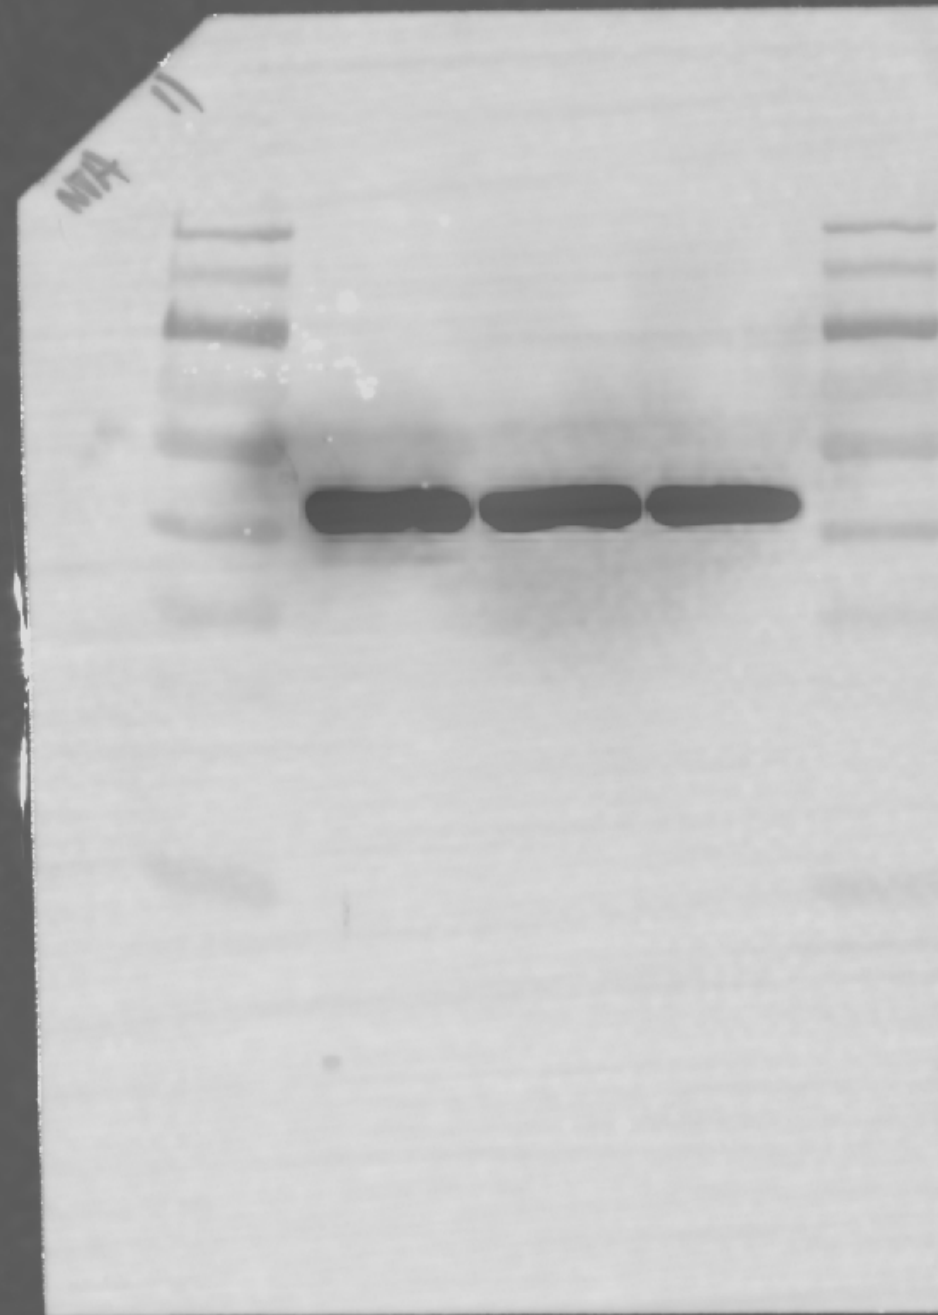



MTA1

1 2 3

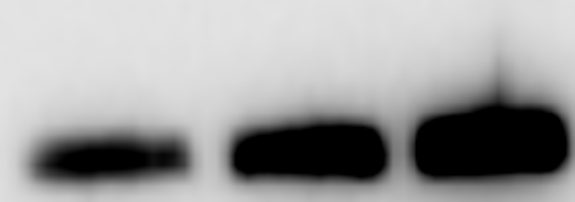

β-actin

1 2 3

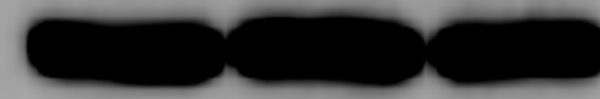

Western blot original bands  
from Figure 5F, Group 3  
bands used for analysis

1 Control  
2 2μM  
3 4μM

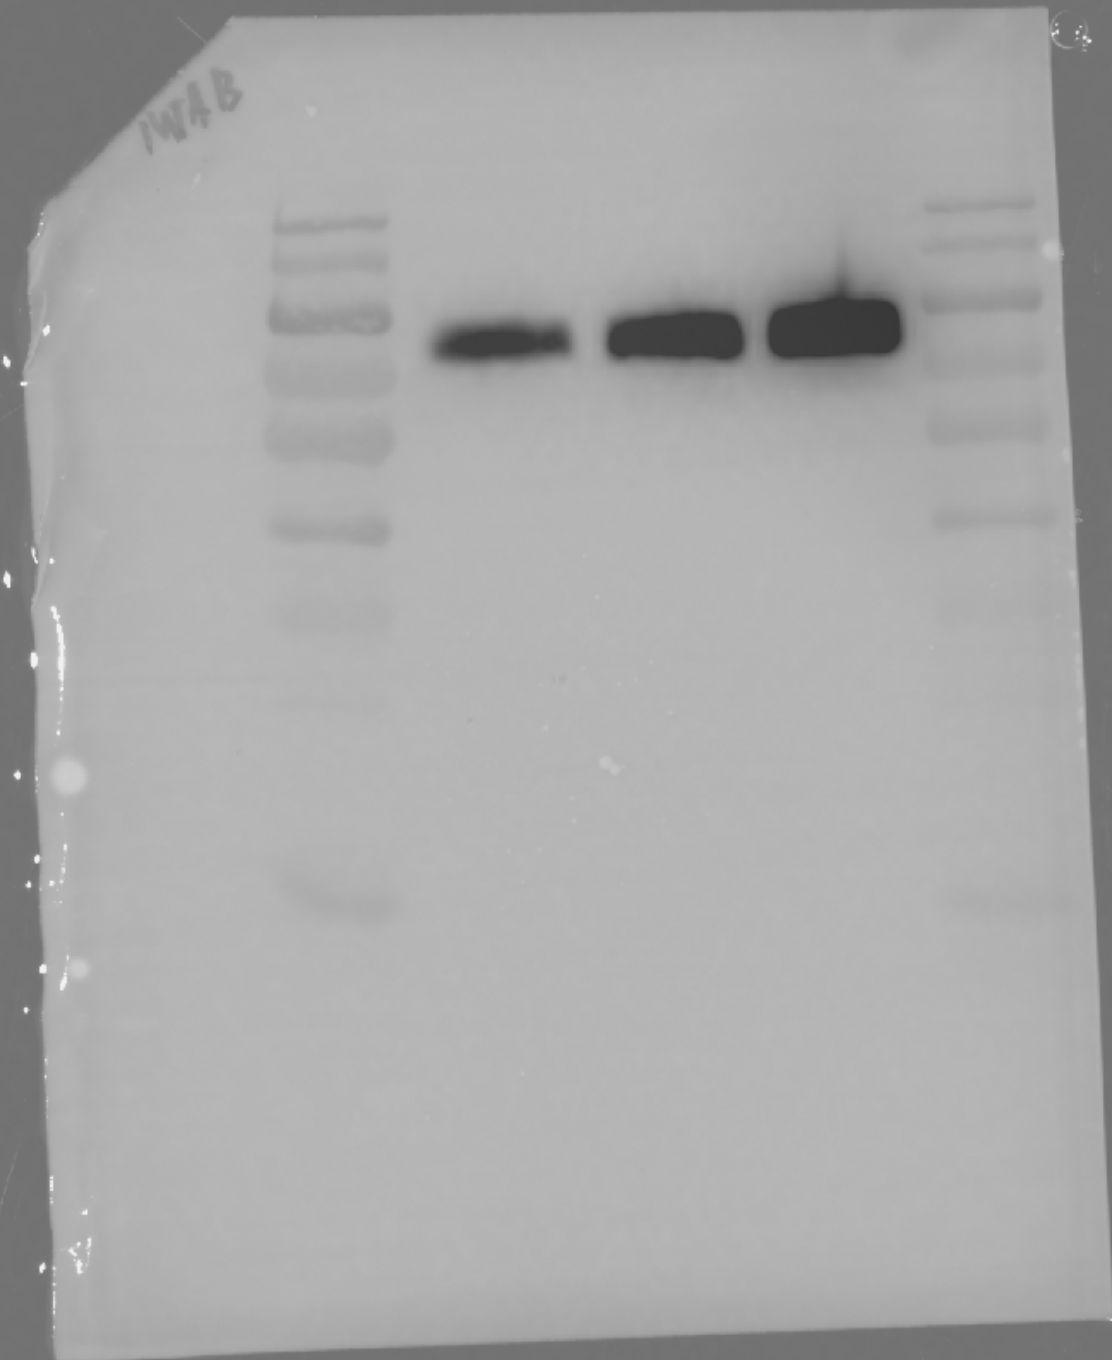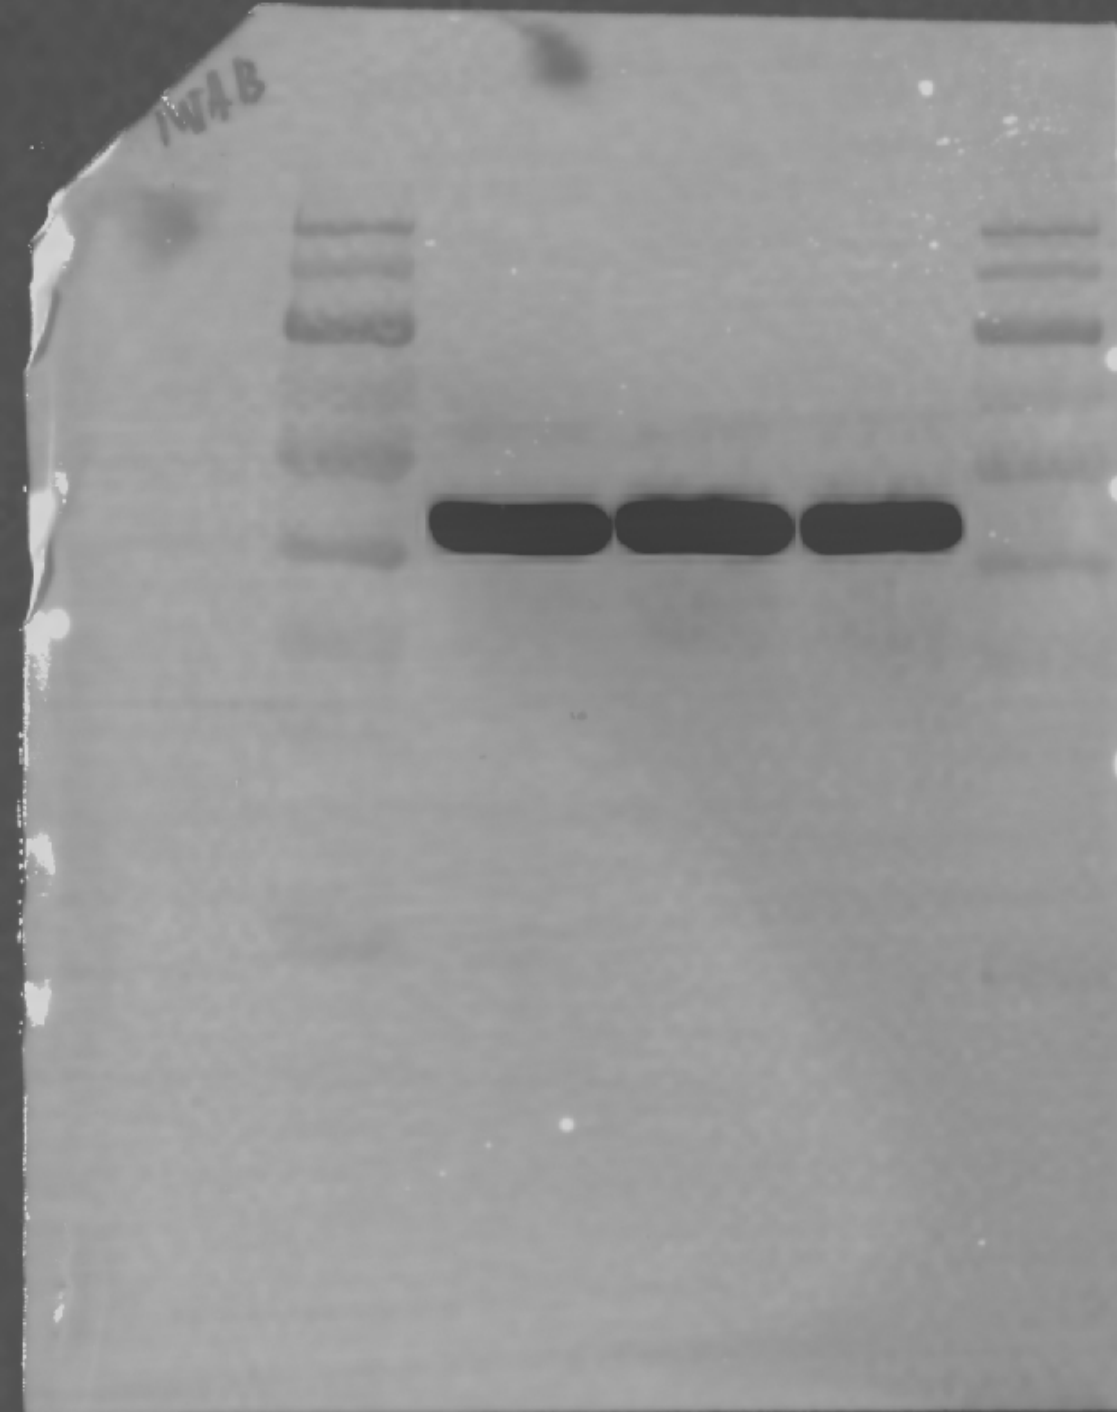

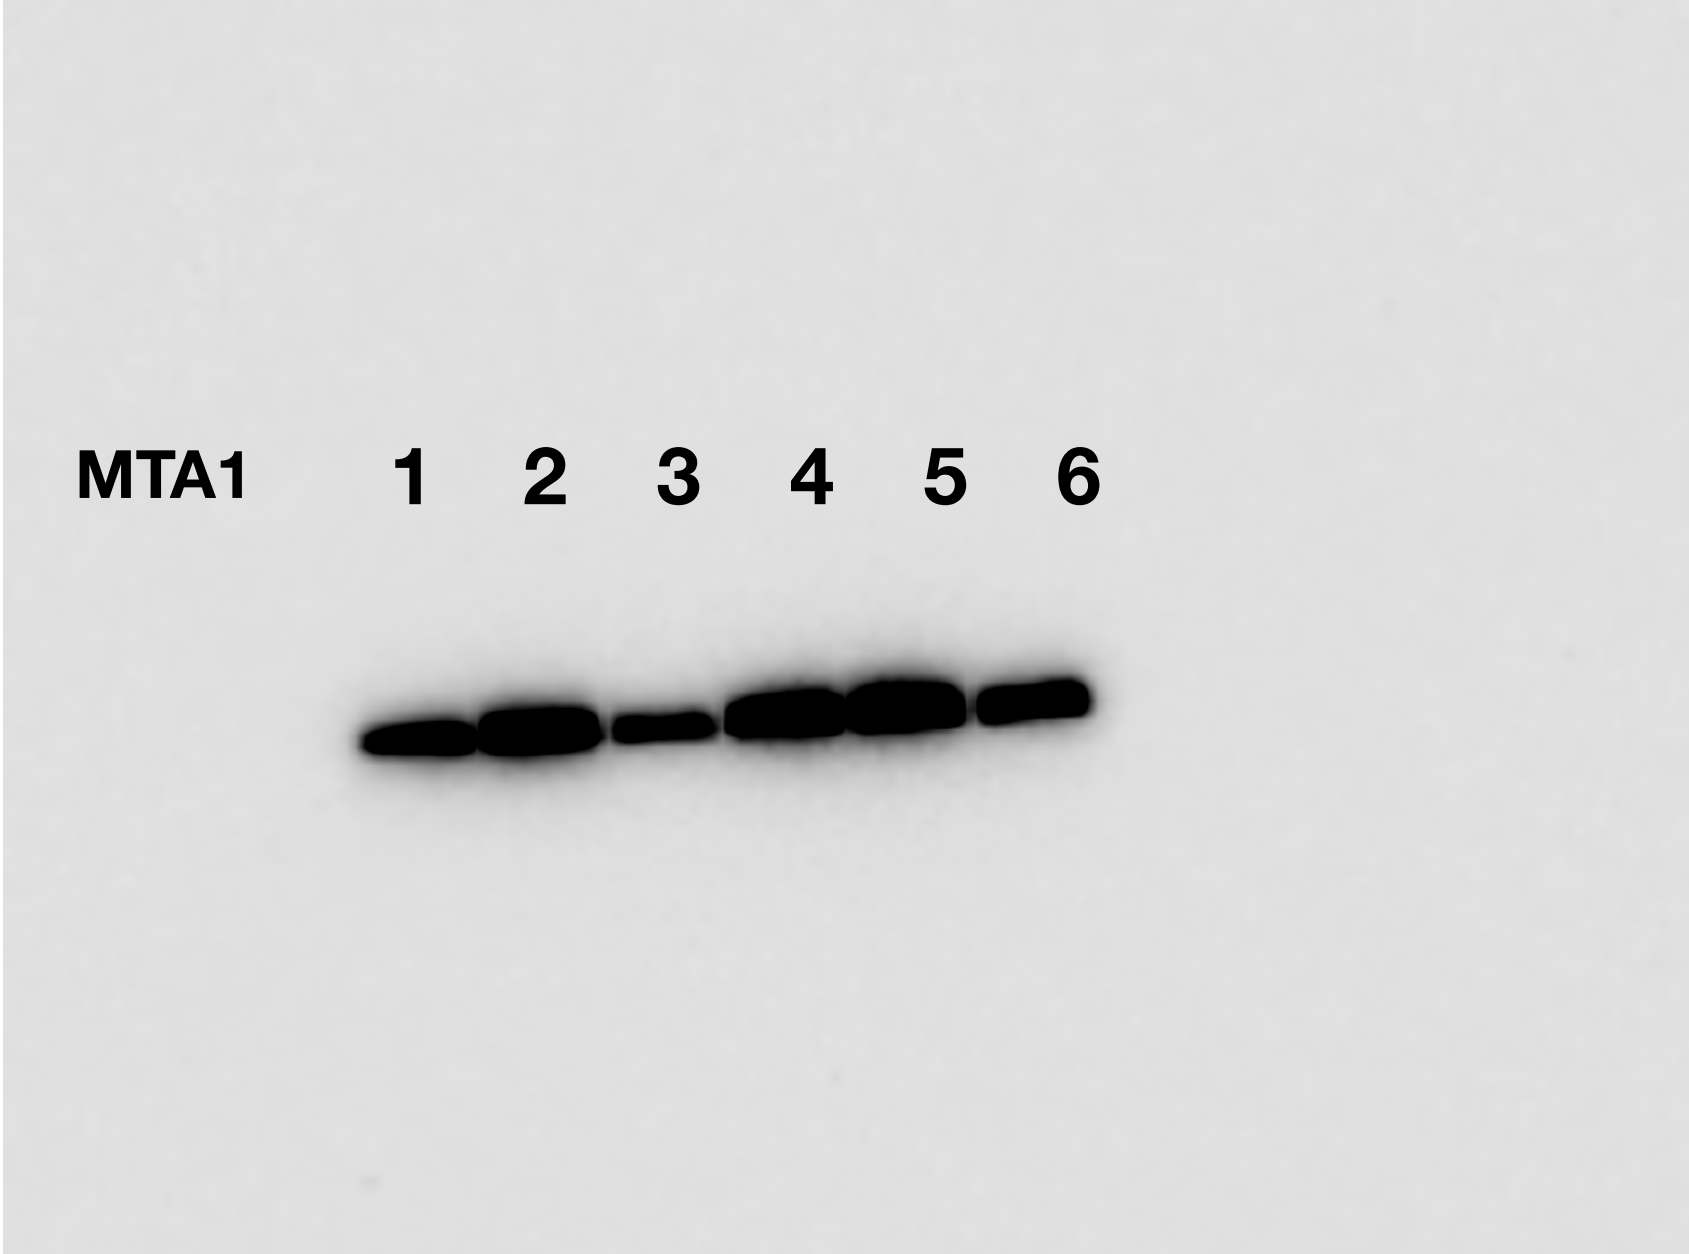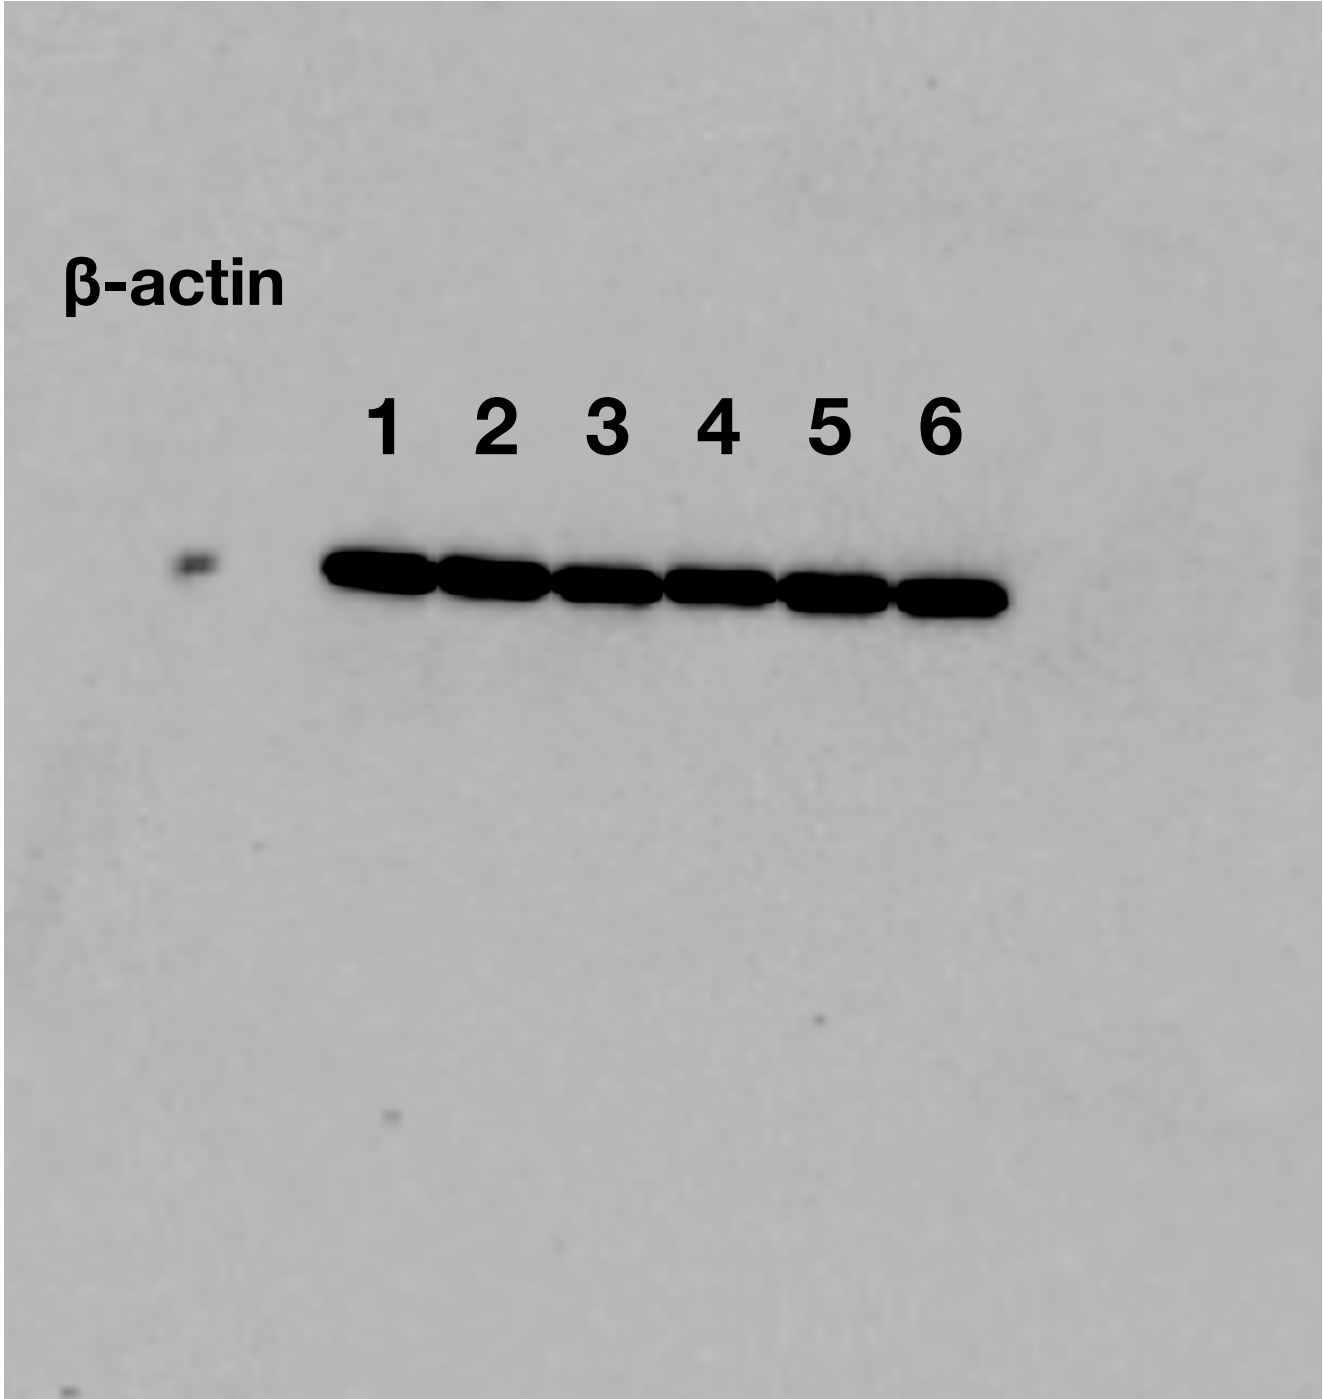

Western blot original bands  
from Figure 5H, Group 1  
bands used for analysis

- 1 Control
- 2 LPS
- 3 LPS+NA
- 4 LPS+5-AZA
- 5 LPS+control siRNA
- 6 LPS+MTA1 siRNA

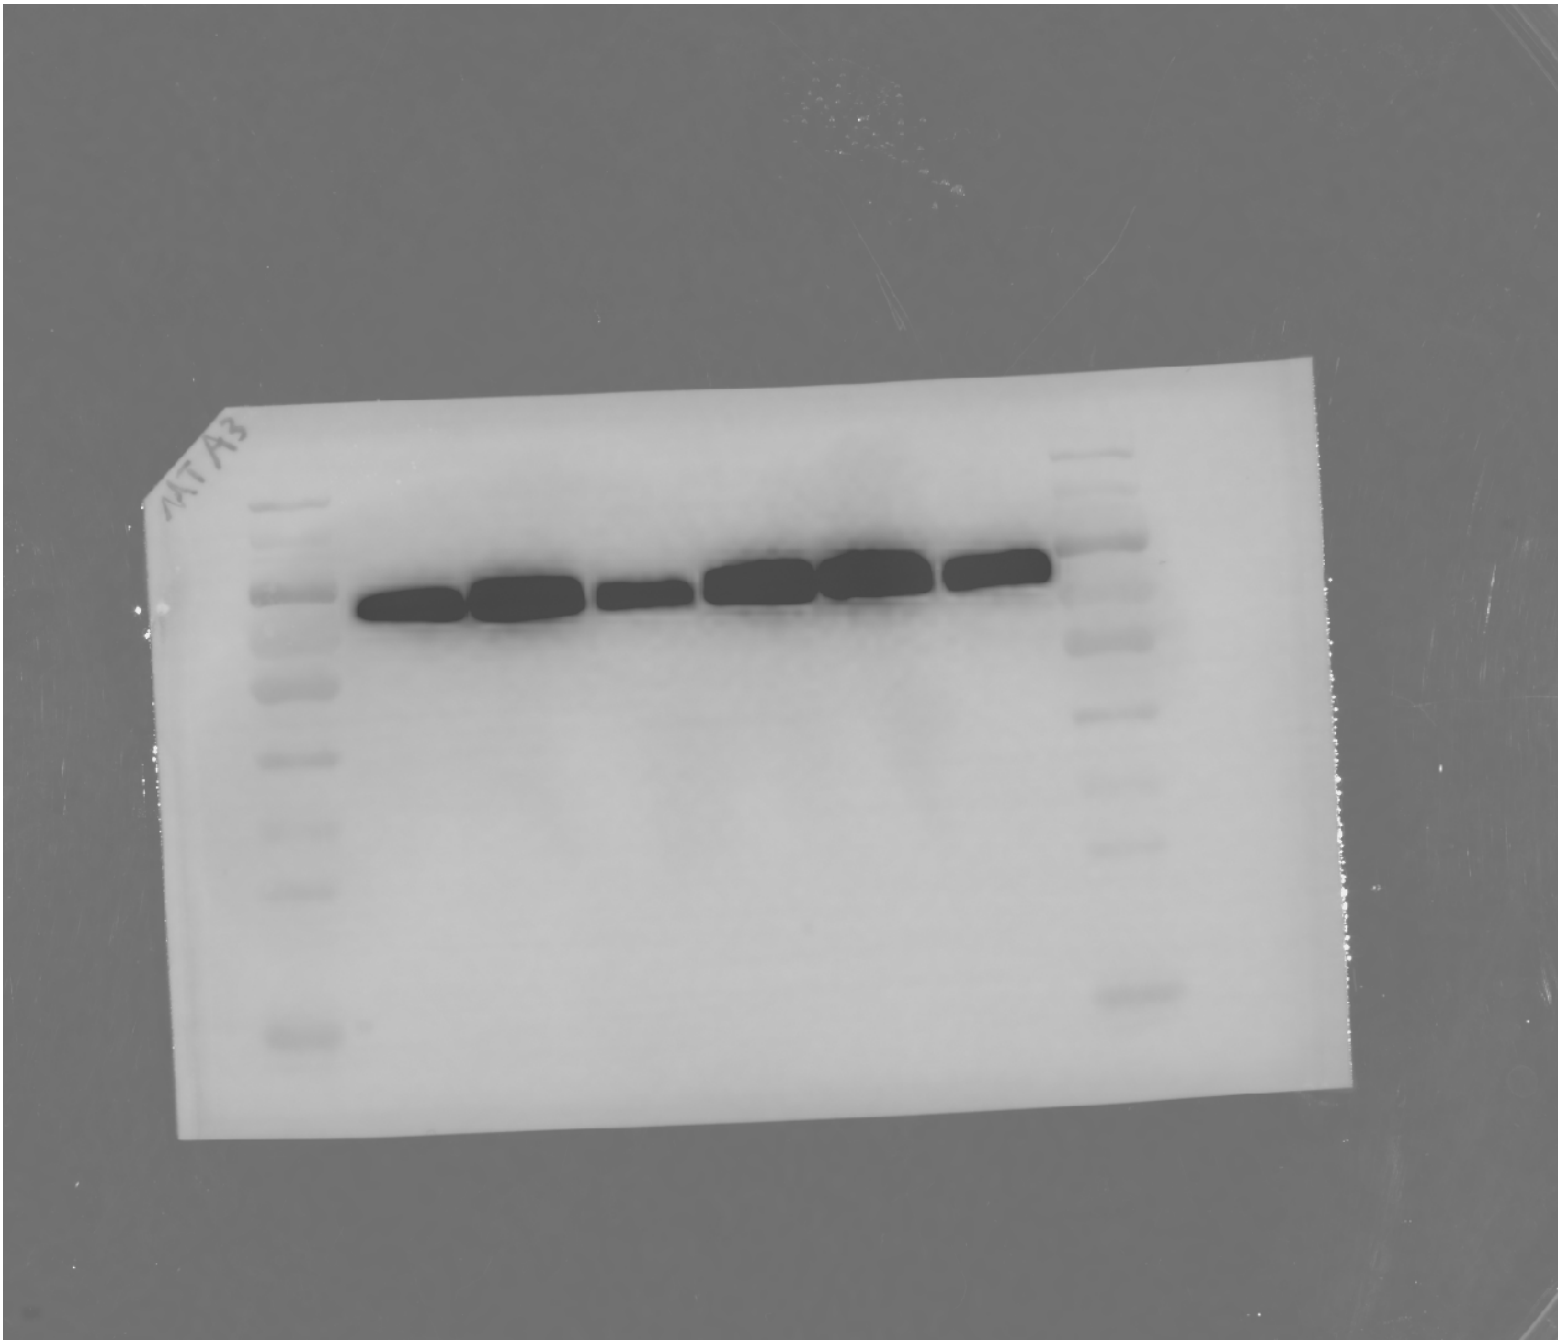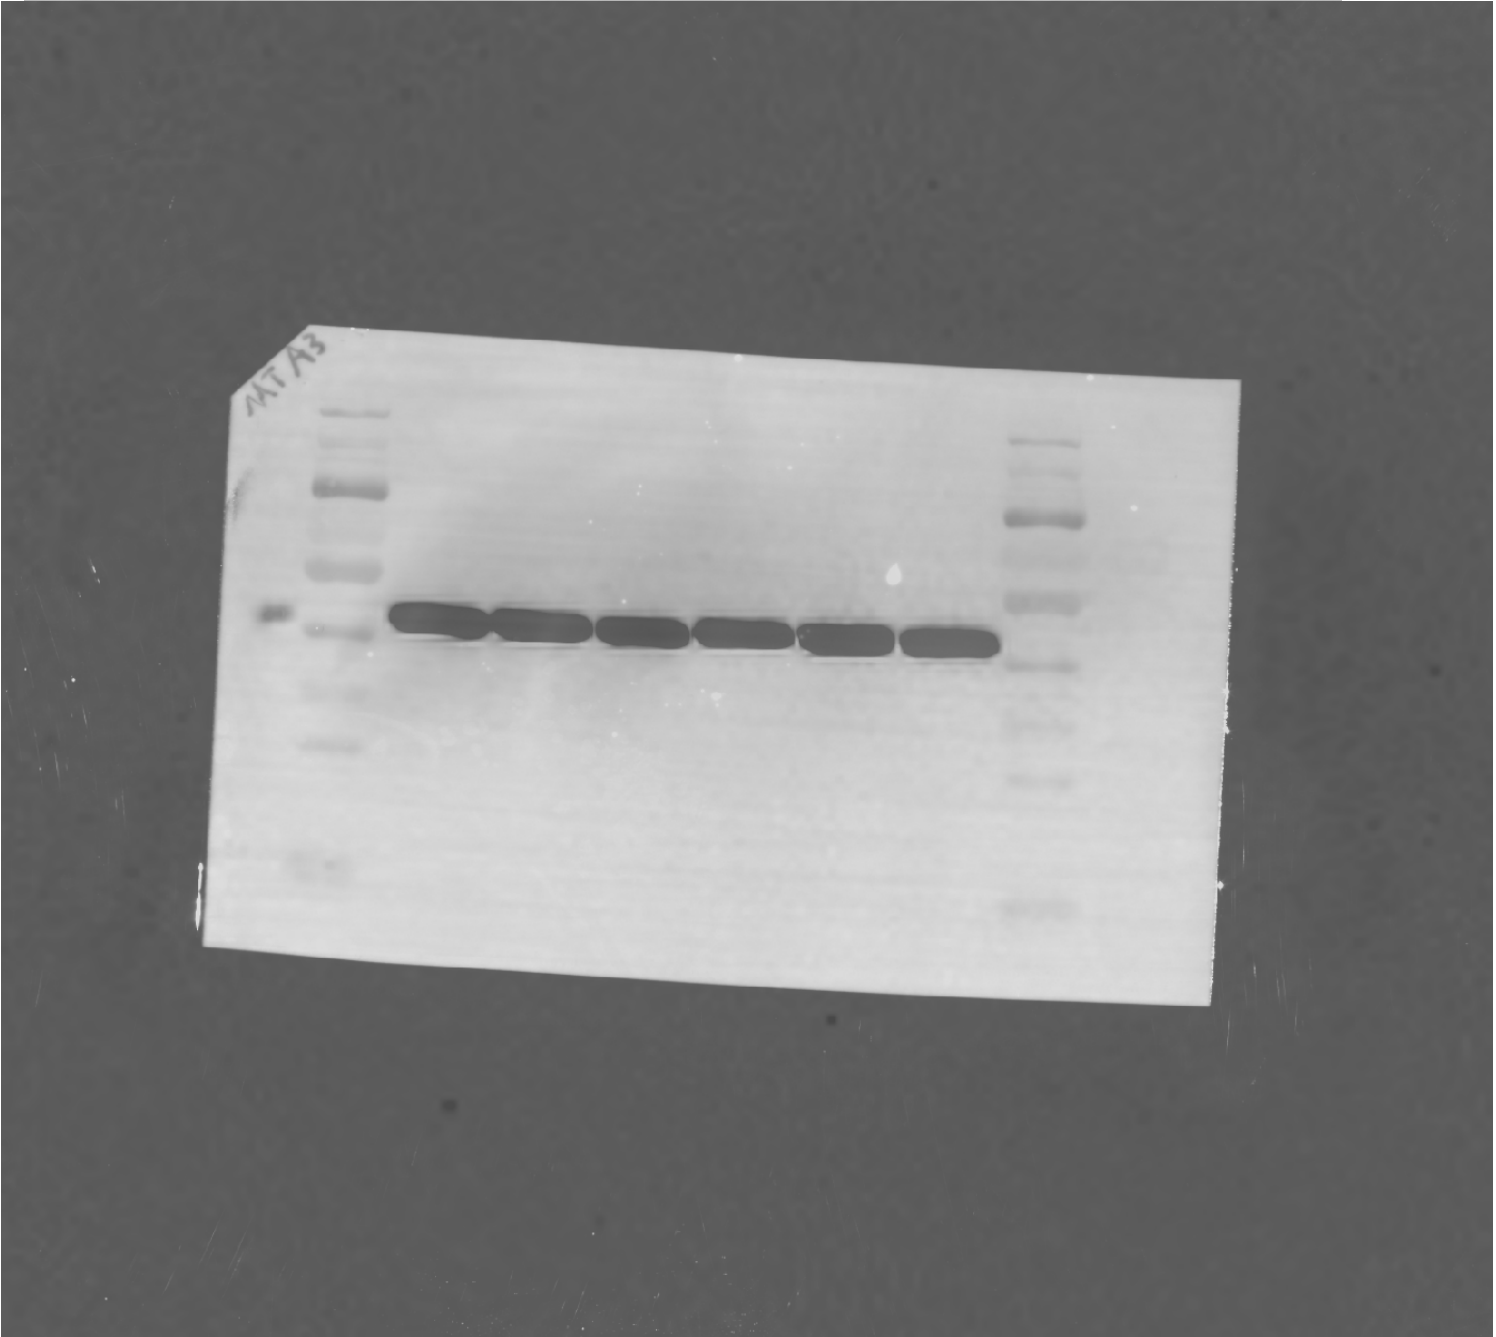

MTA1

1 2 3 4 5 6

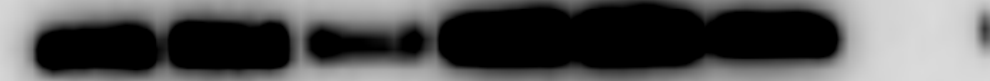

$\beta$ -actin

1 2 3 4 5 6

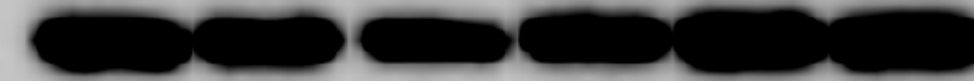

Western blot original bands  
from Figure 5H, Group 2  
bands used for analysis

1 Control

2 LPS

3 LPS+NA

4 LPS+5-AZA

5 LPS+control siRNA

6 LPS+MTA1 siRNA

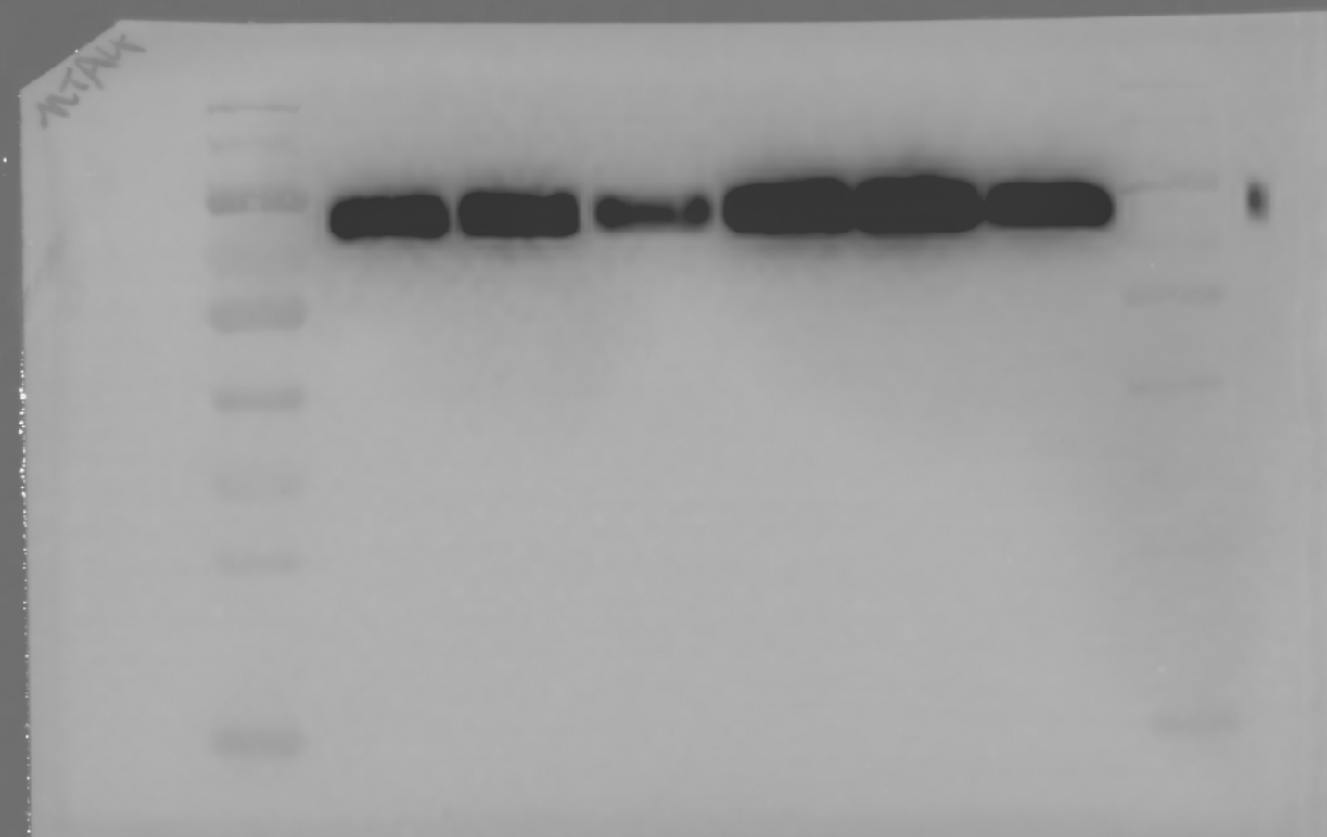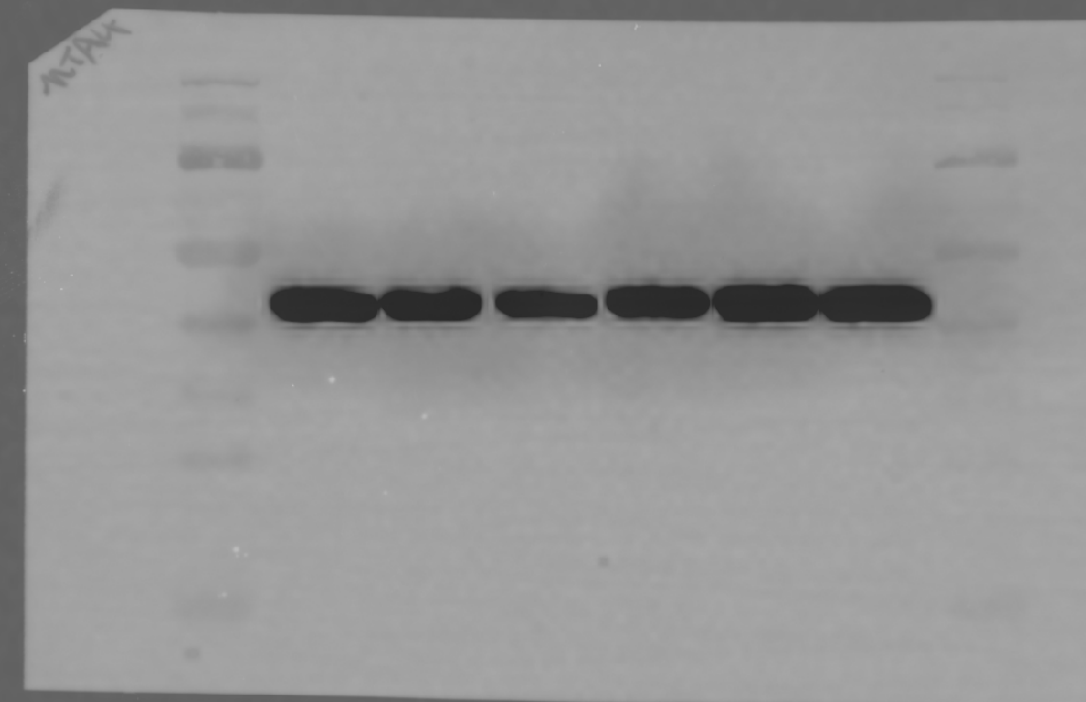

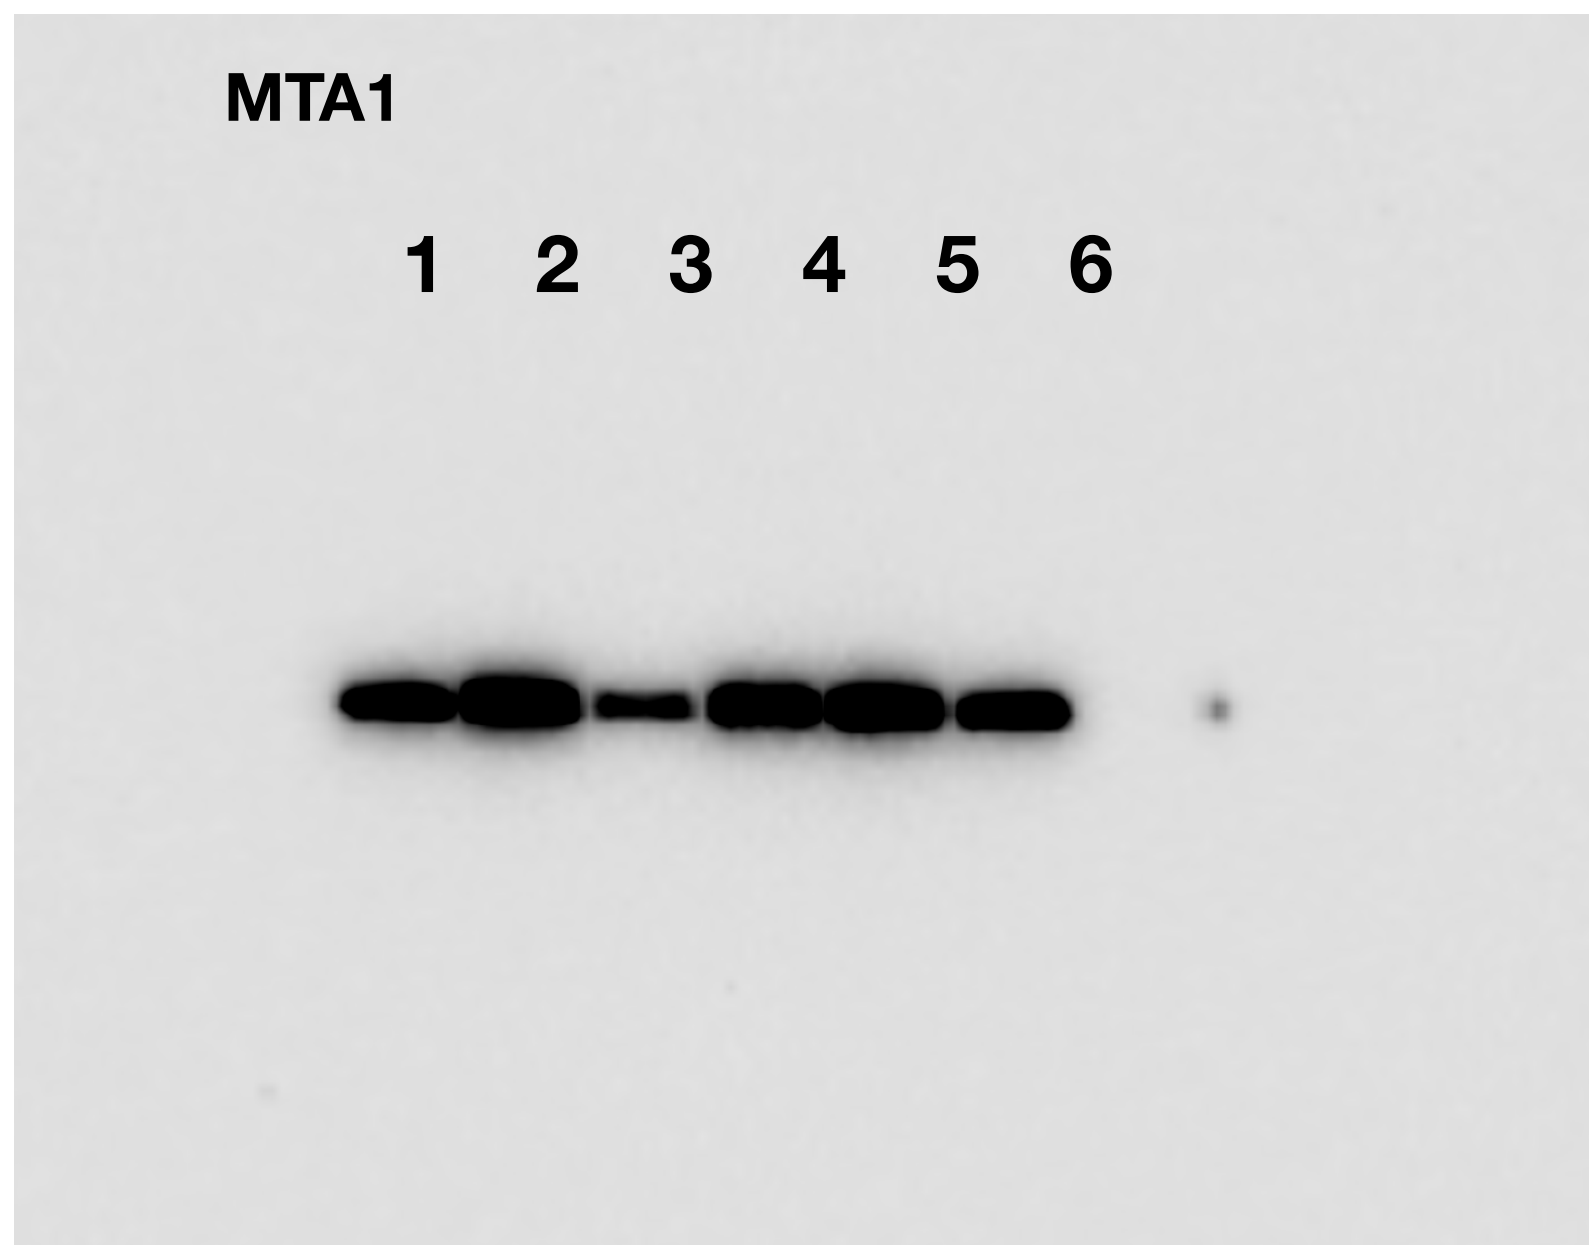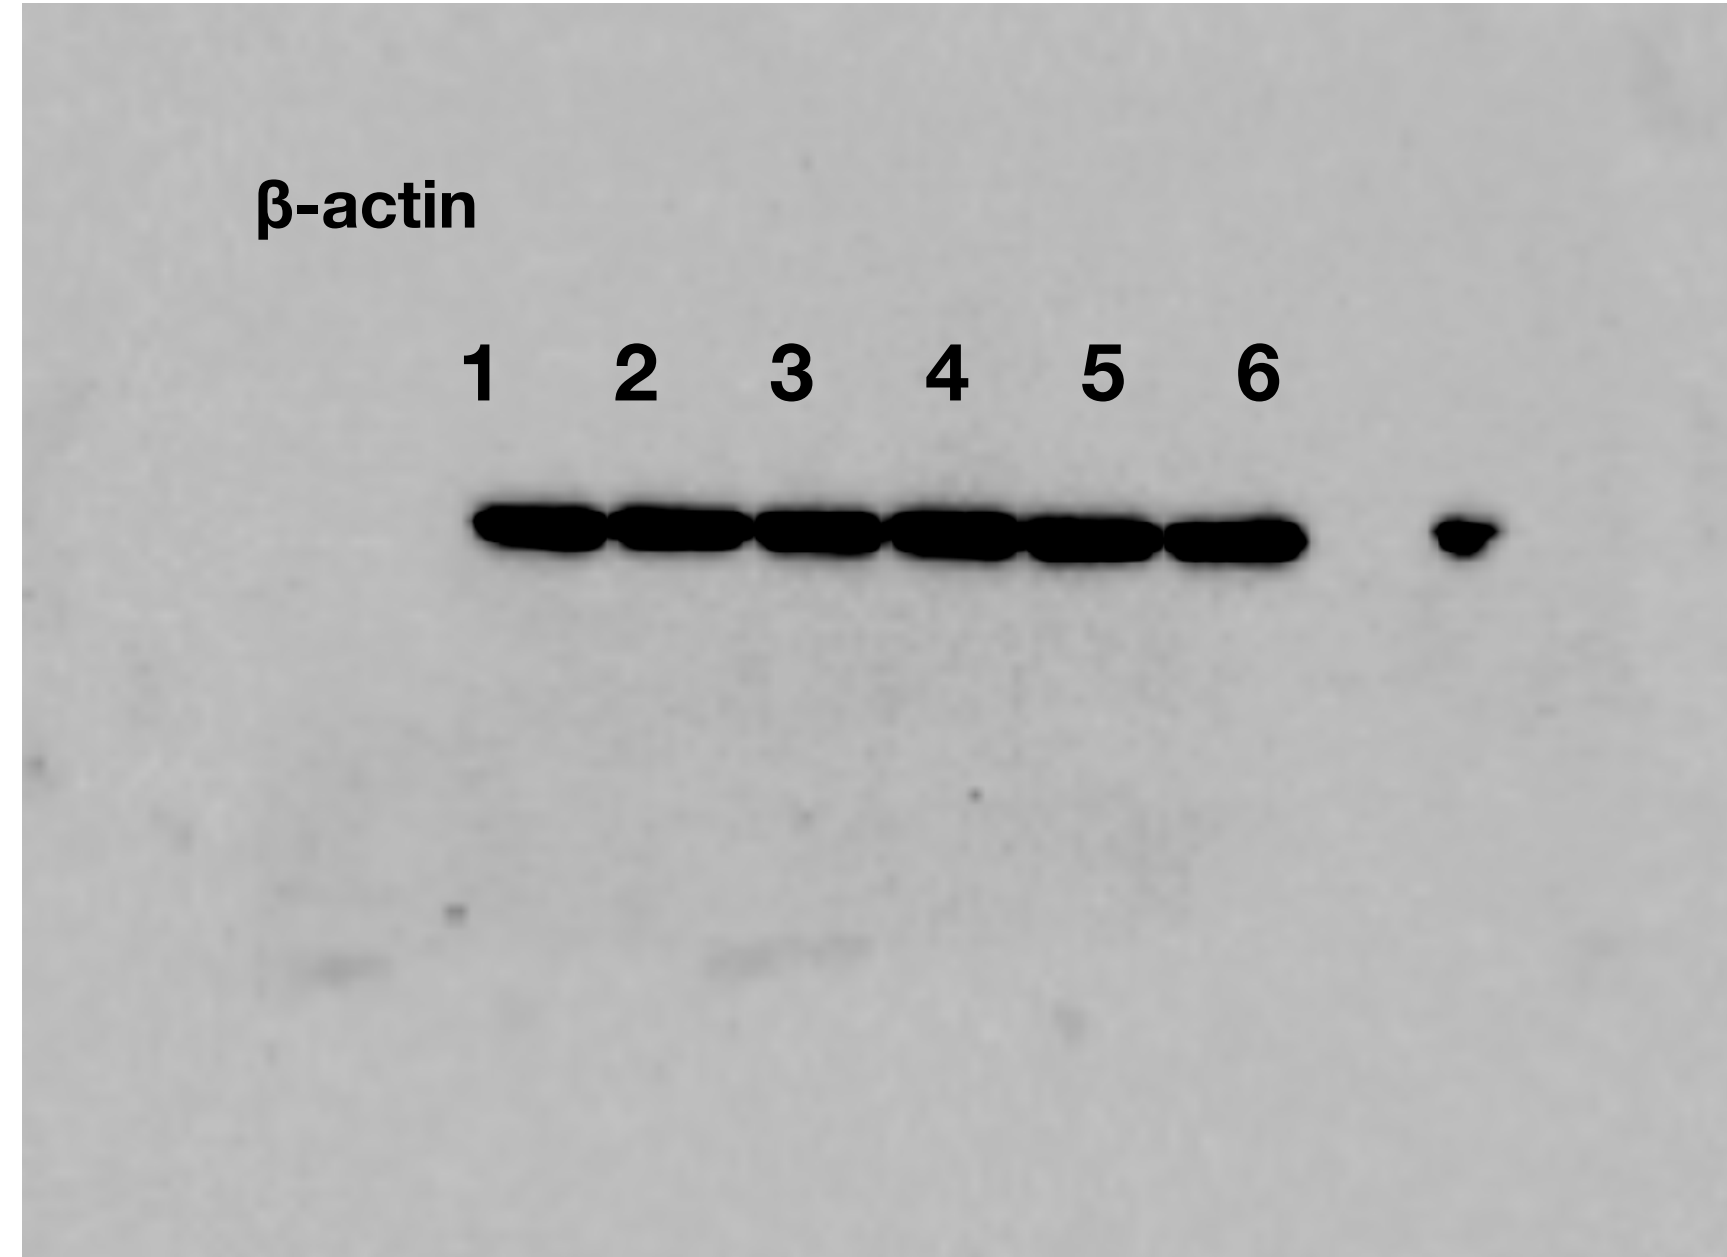

**Western blot original bands  
from Figure 5H, Group 3  
bands used for analysis**

- 1 Control**
- 2 LPS**
- 3 LPS+NA**
- 4 LPS+5-AZA**
- 5 LPS+control siRNA**
- 6 LPS+MTA1 siRNA**

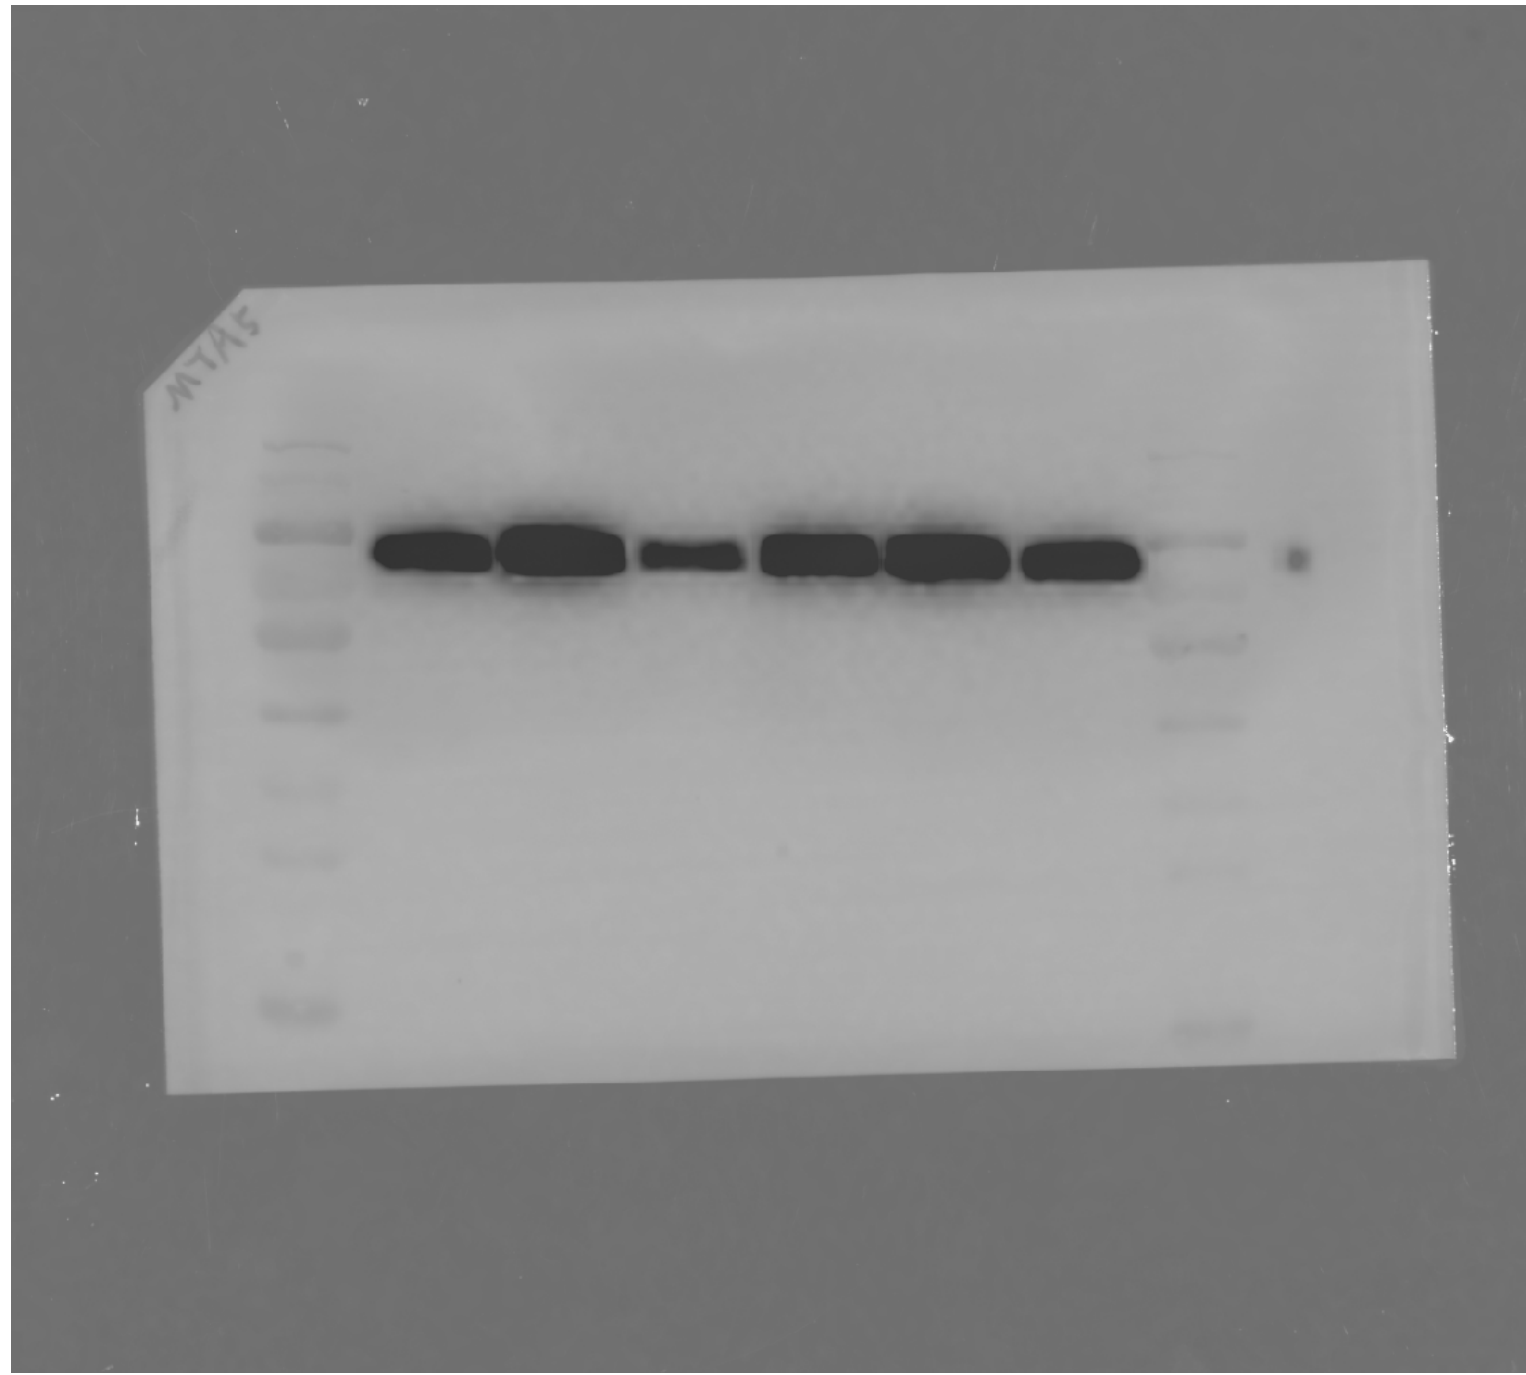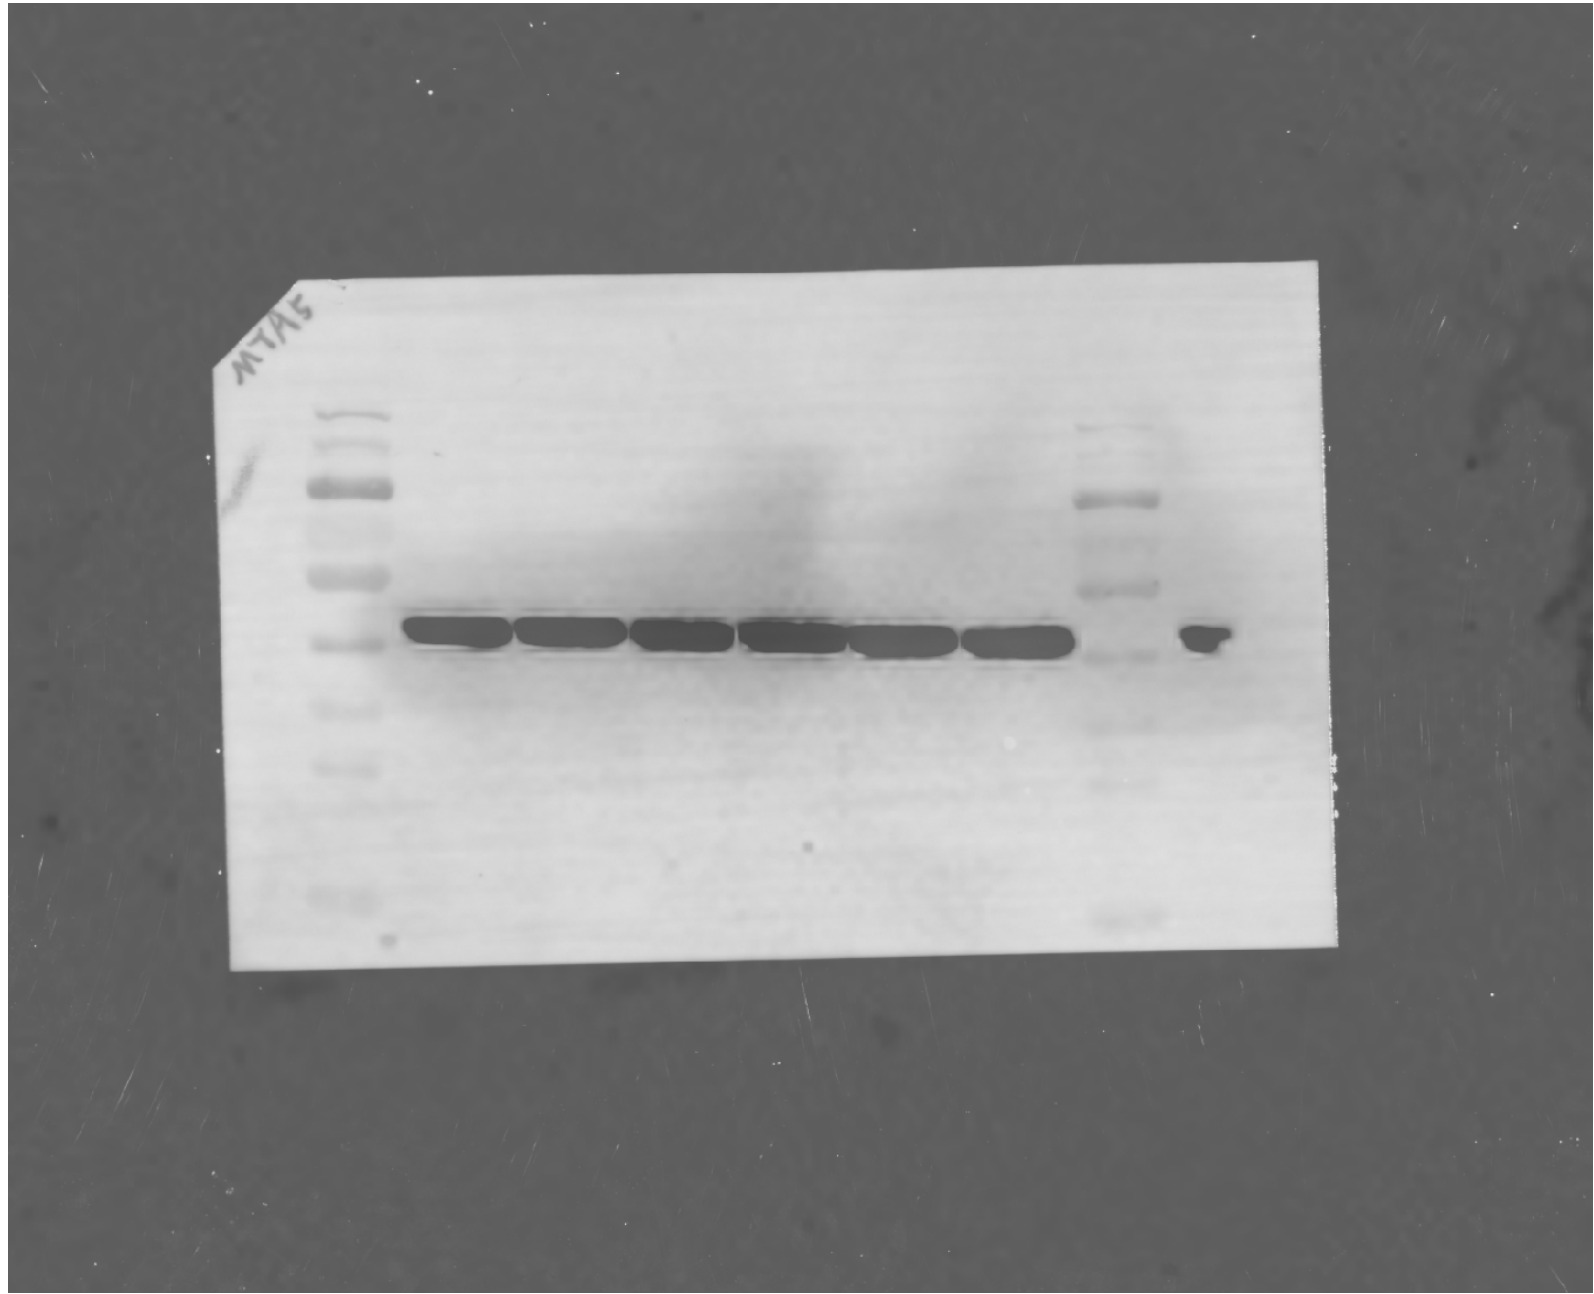



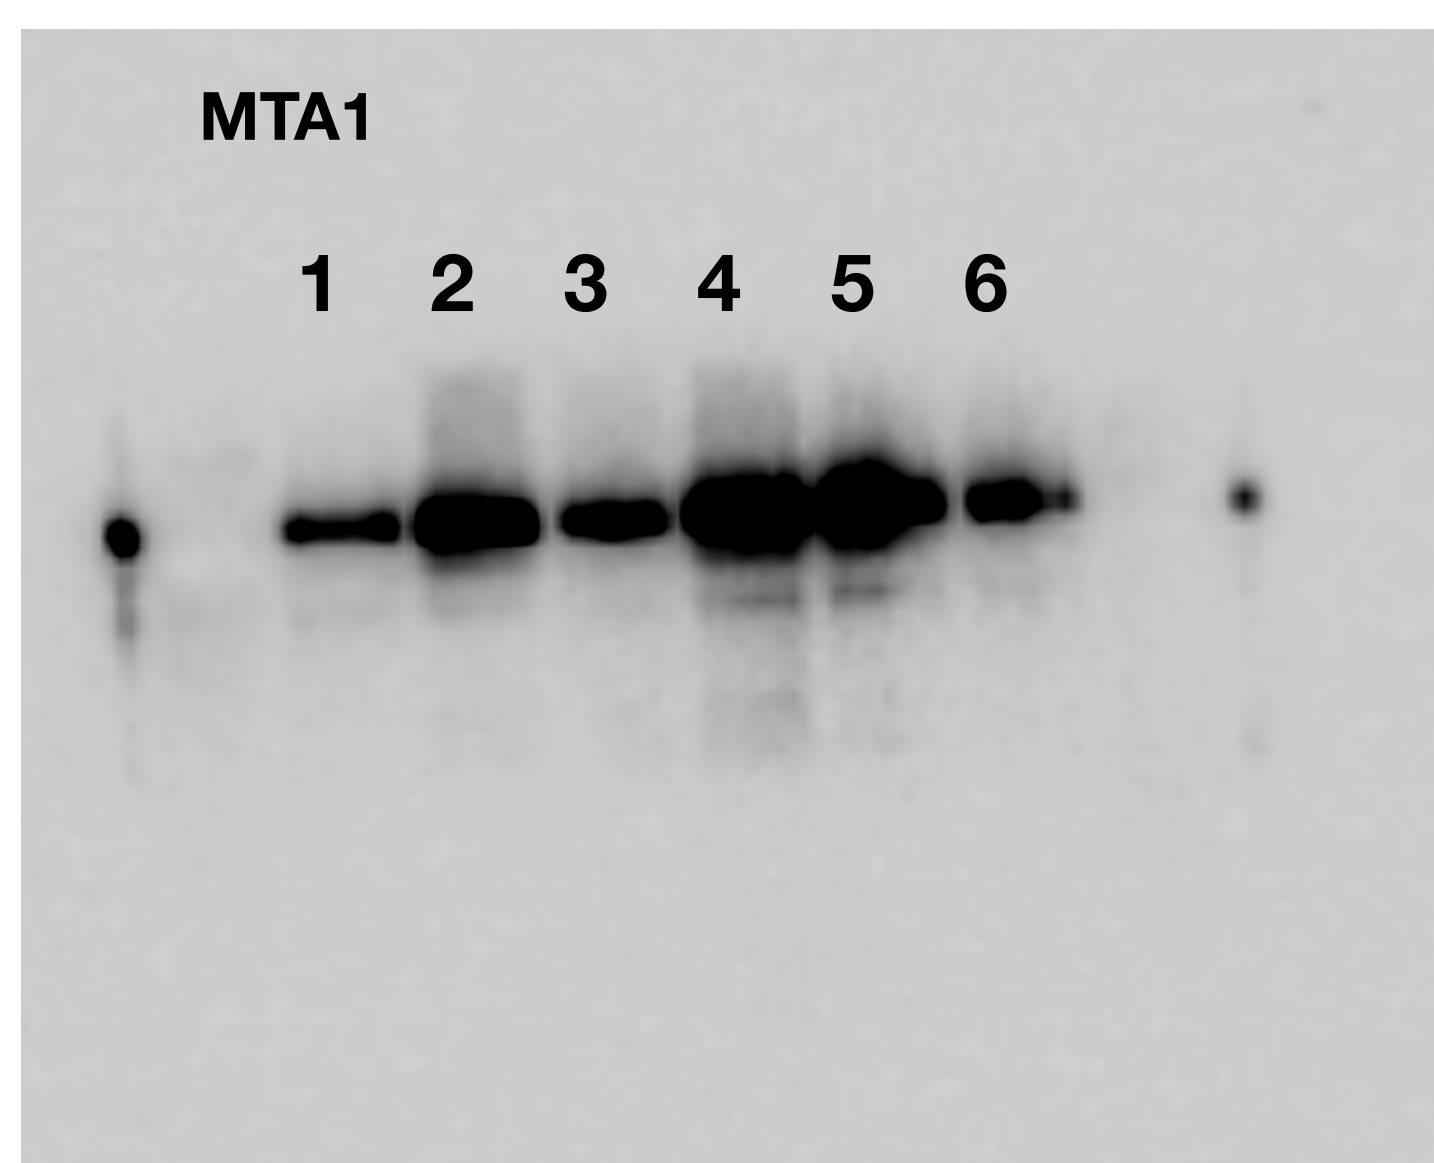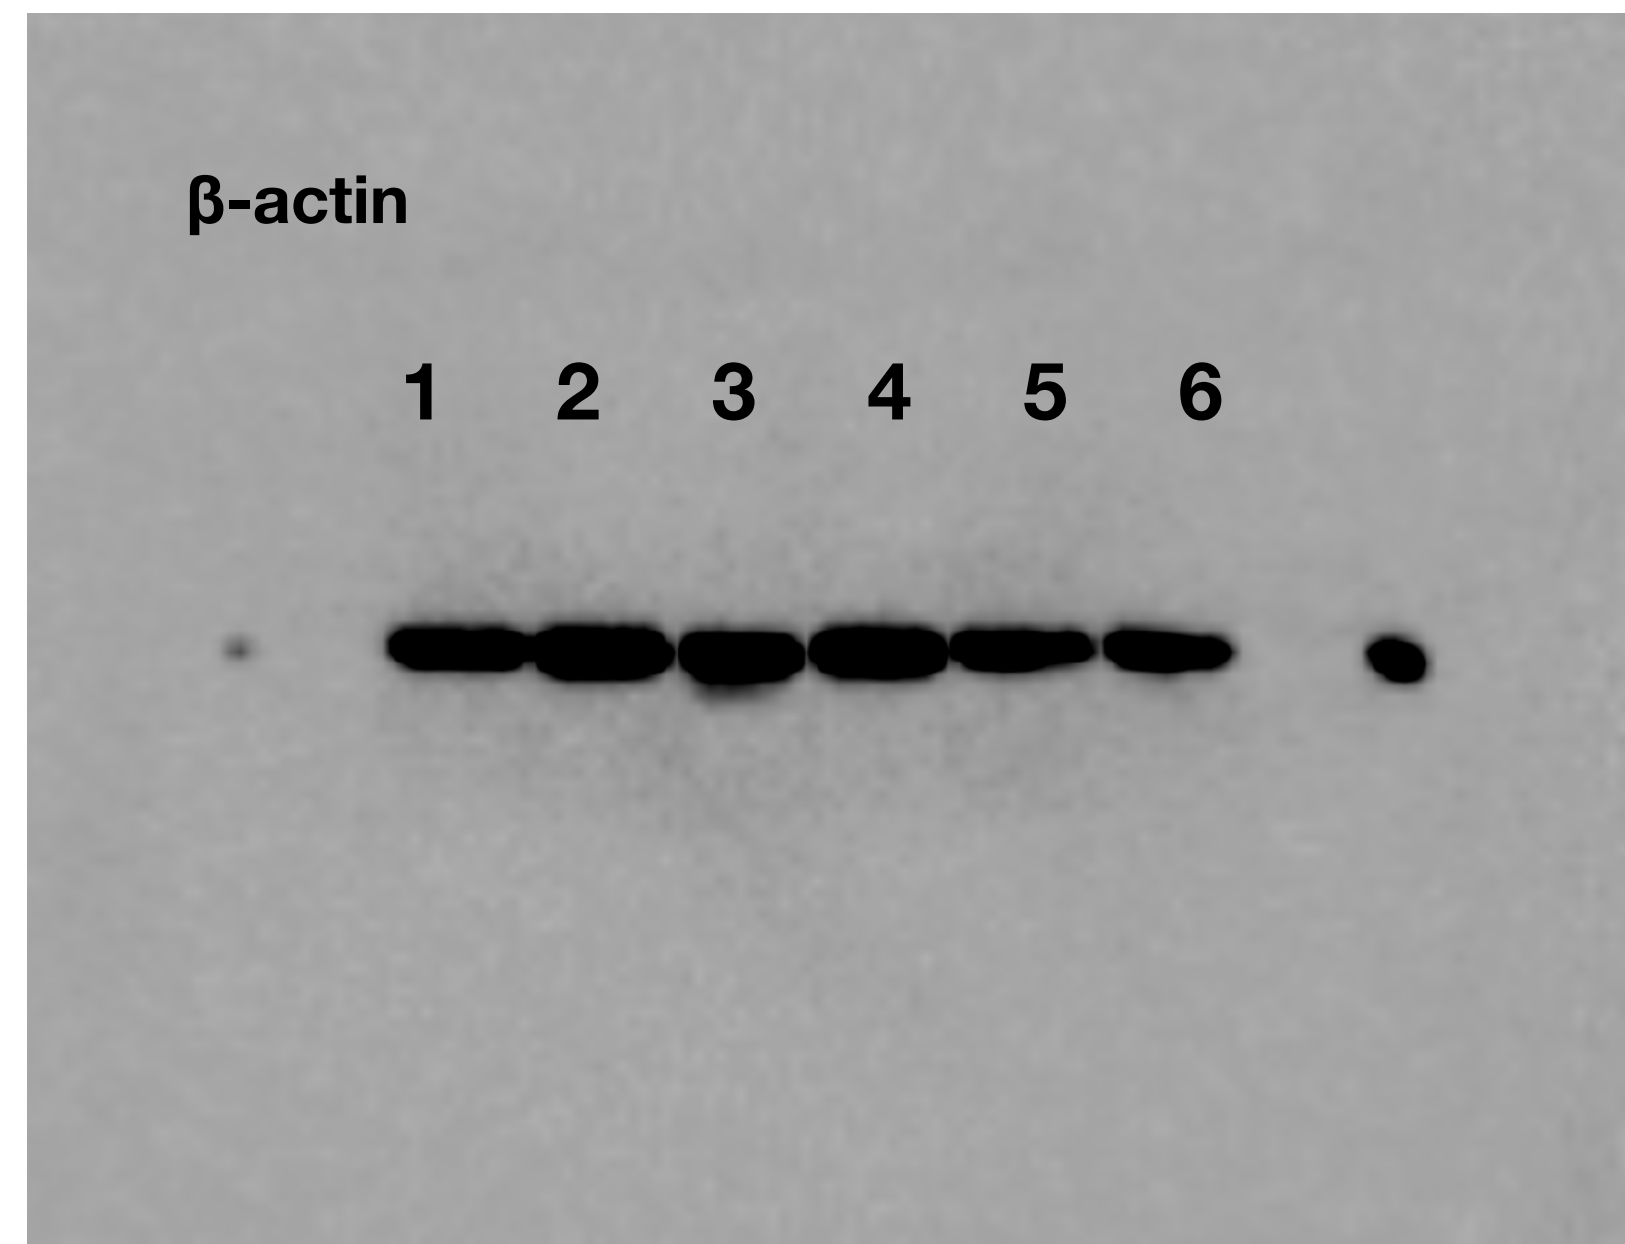

**Western blot original bands  
from Figure 5H, Group 4  
bands used for analysis**

- 1 Control**
- 2 LPS**
- 3 LPS+NA**
- 4 LPS+5-AZA**
- 5 LPS+control siRNA**
- 6 LPS+MTA1 siRNA**

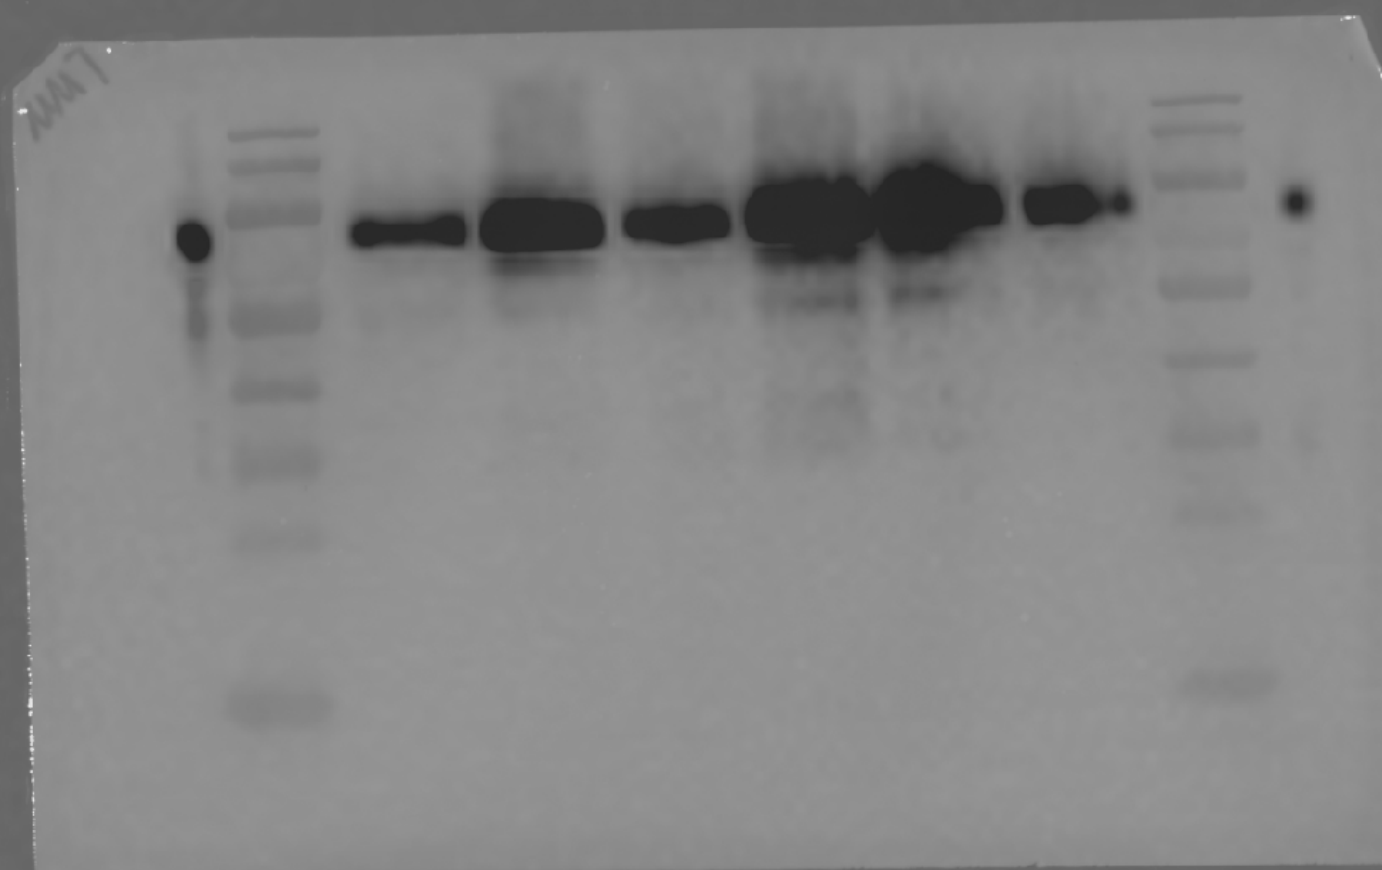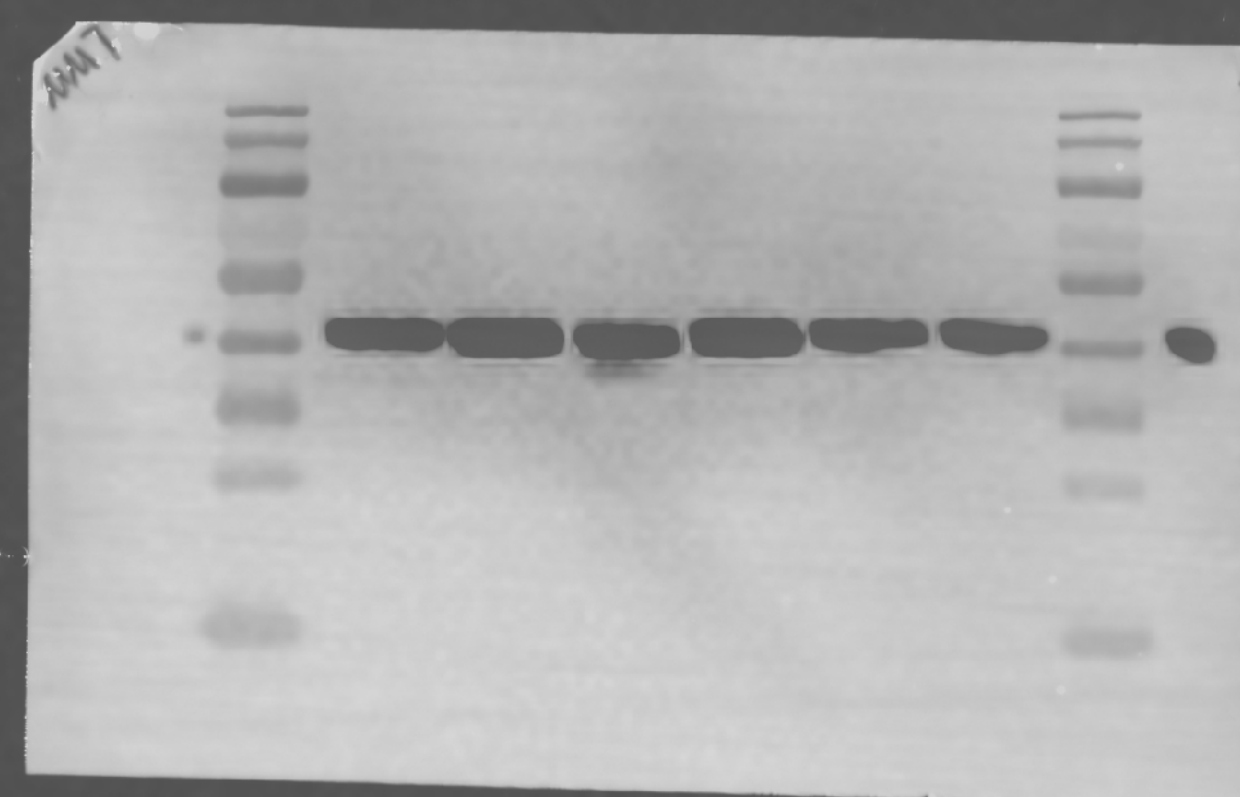



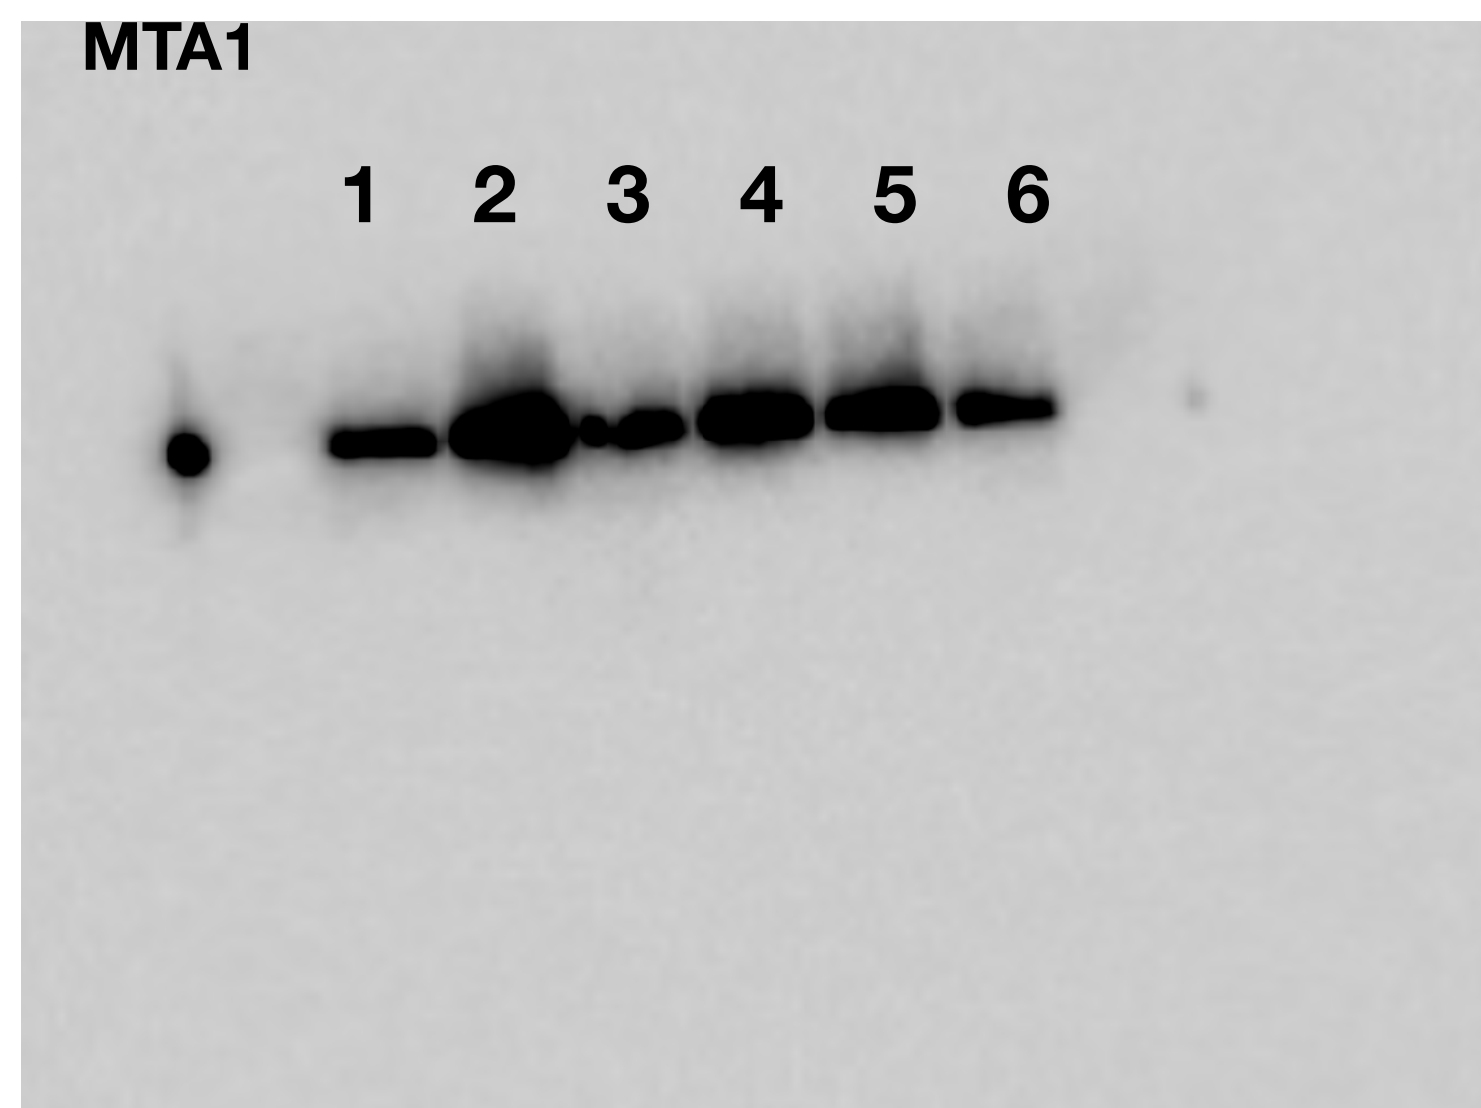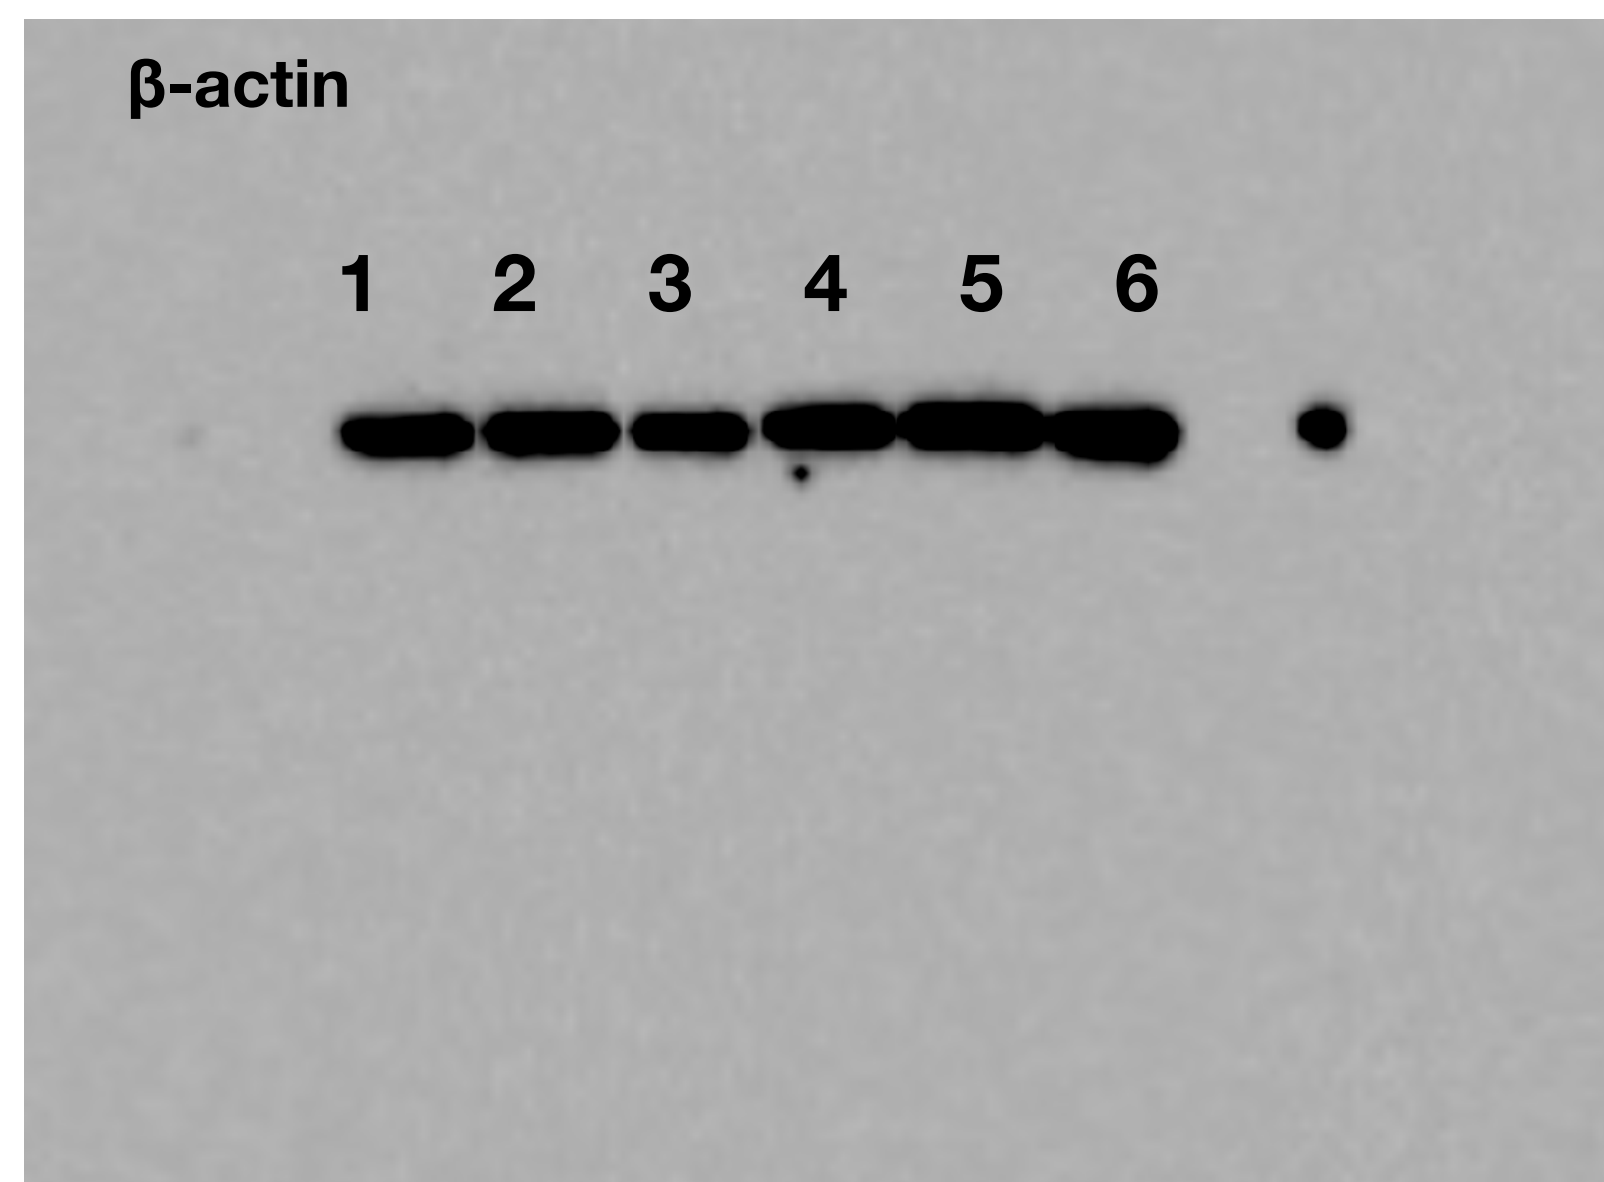

**Western blot original bands  
from Figure 5H, Group 5  
bands used for analysis**

- 1 Control**
- 2 LPS**
- 3 LPS+NA**
- 4 LPS+5-AZA**
- 5 LPS+control siRNA**
- 6 LPS+MTA1 siRNA**

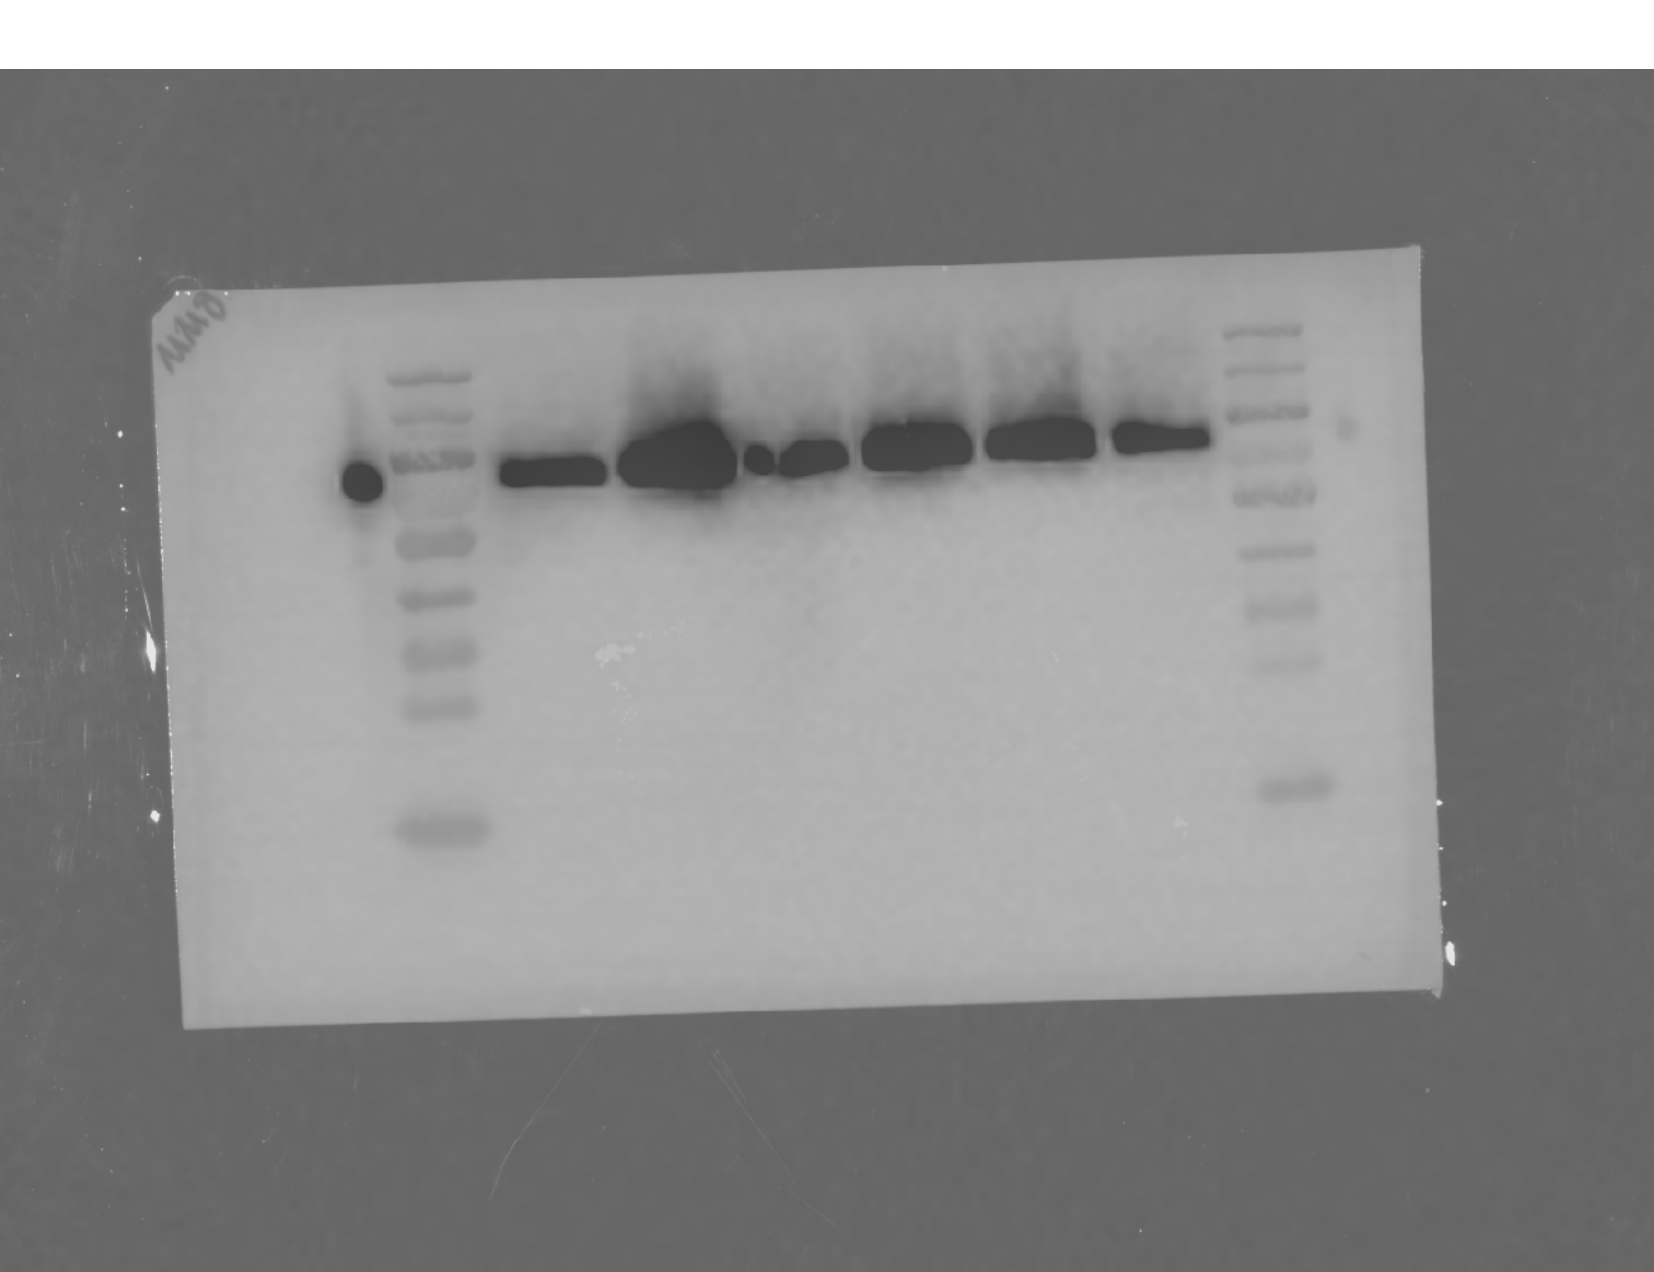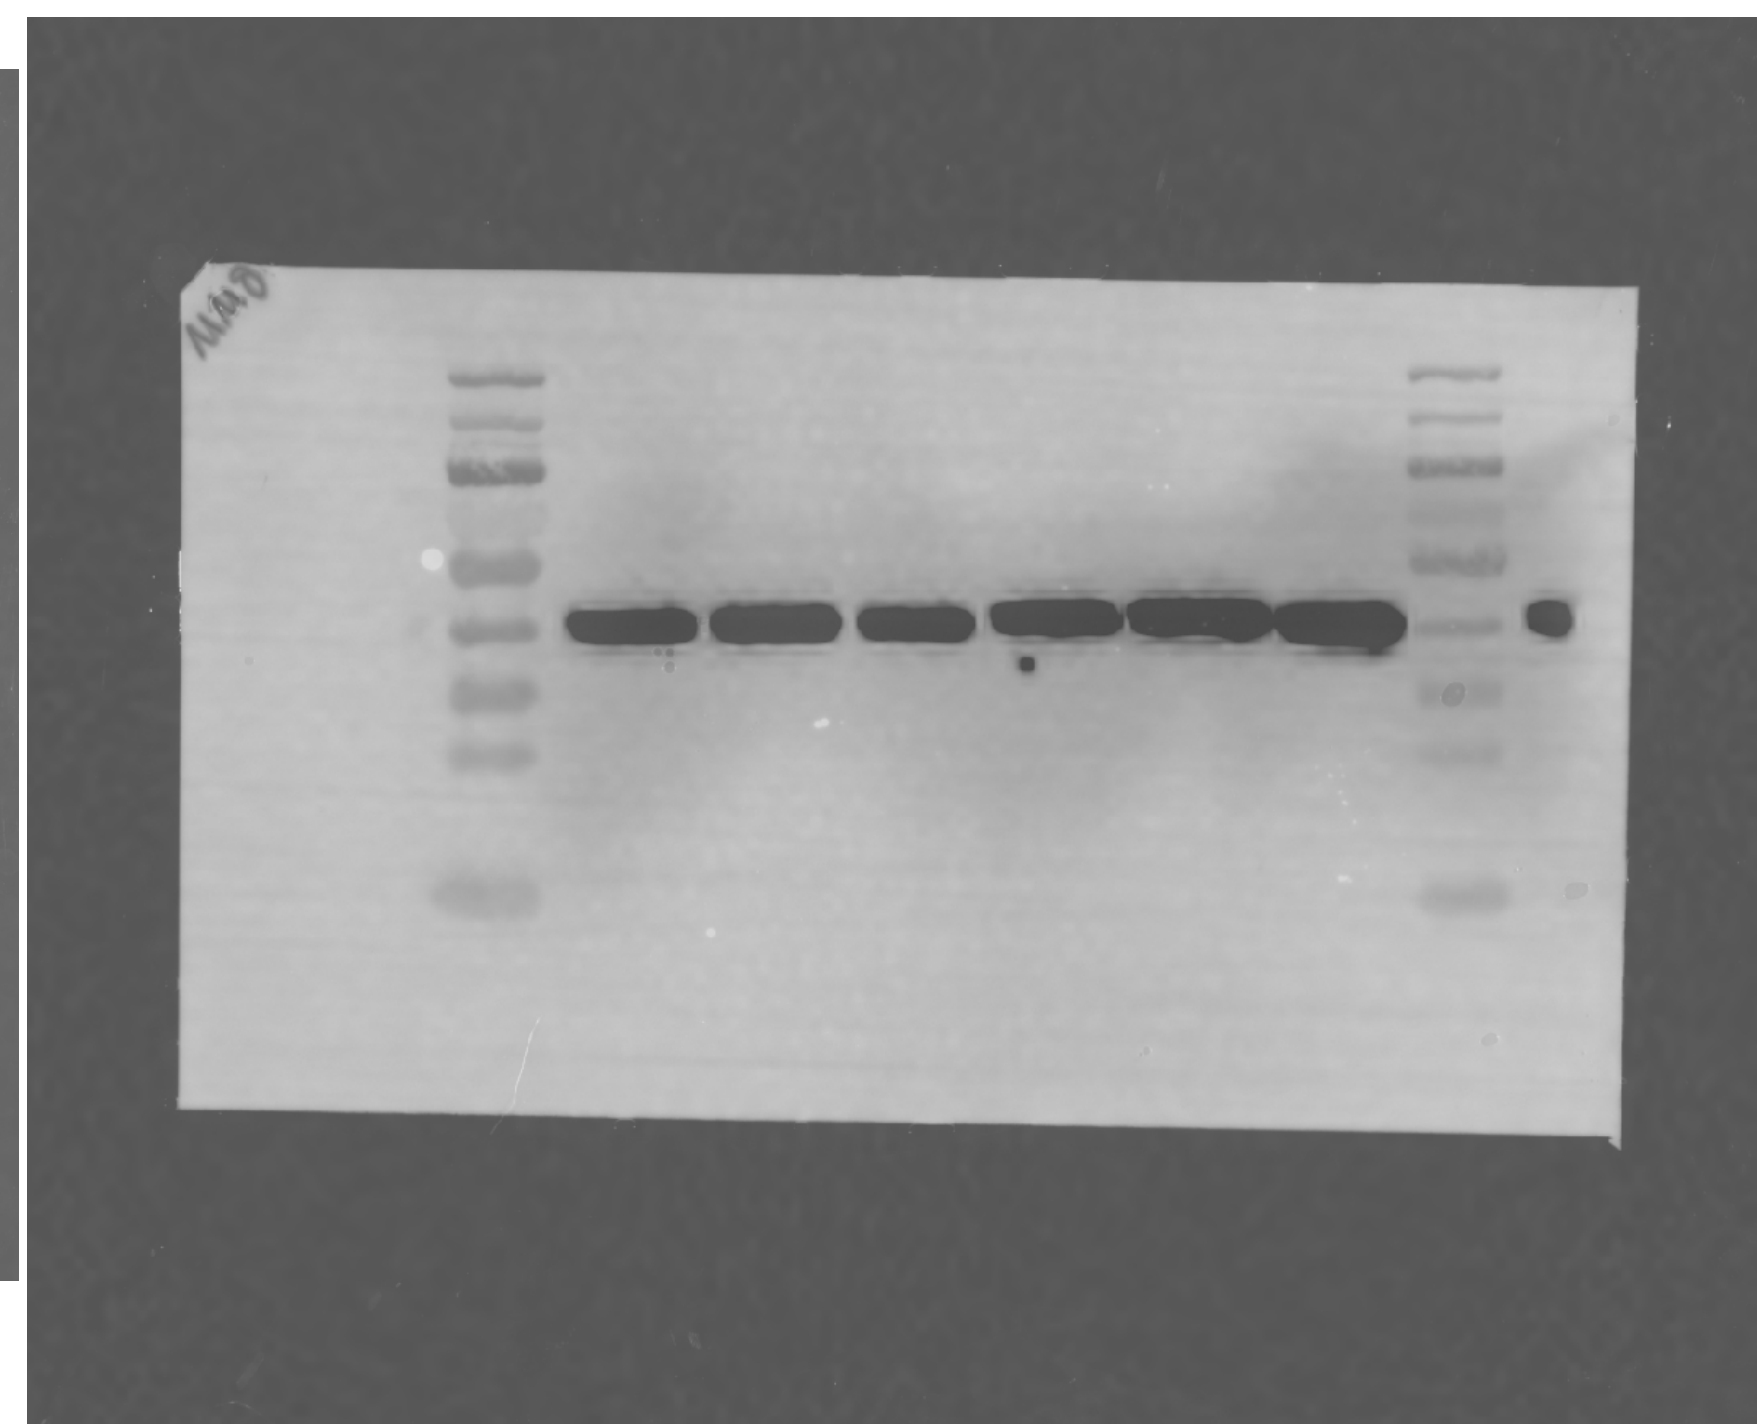

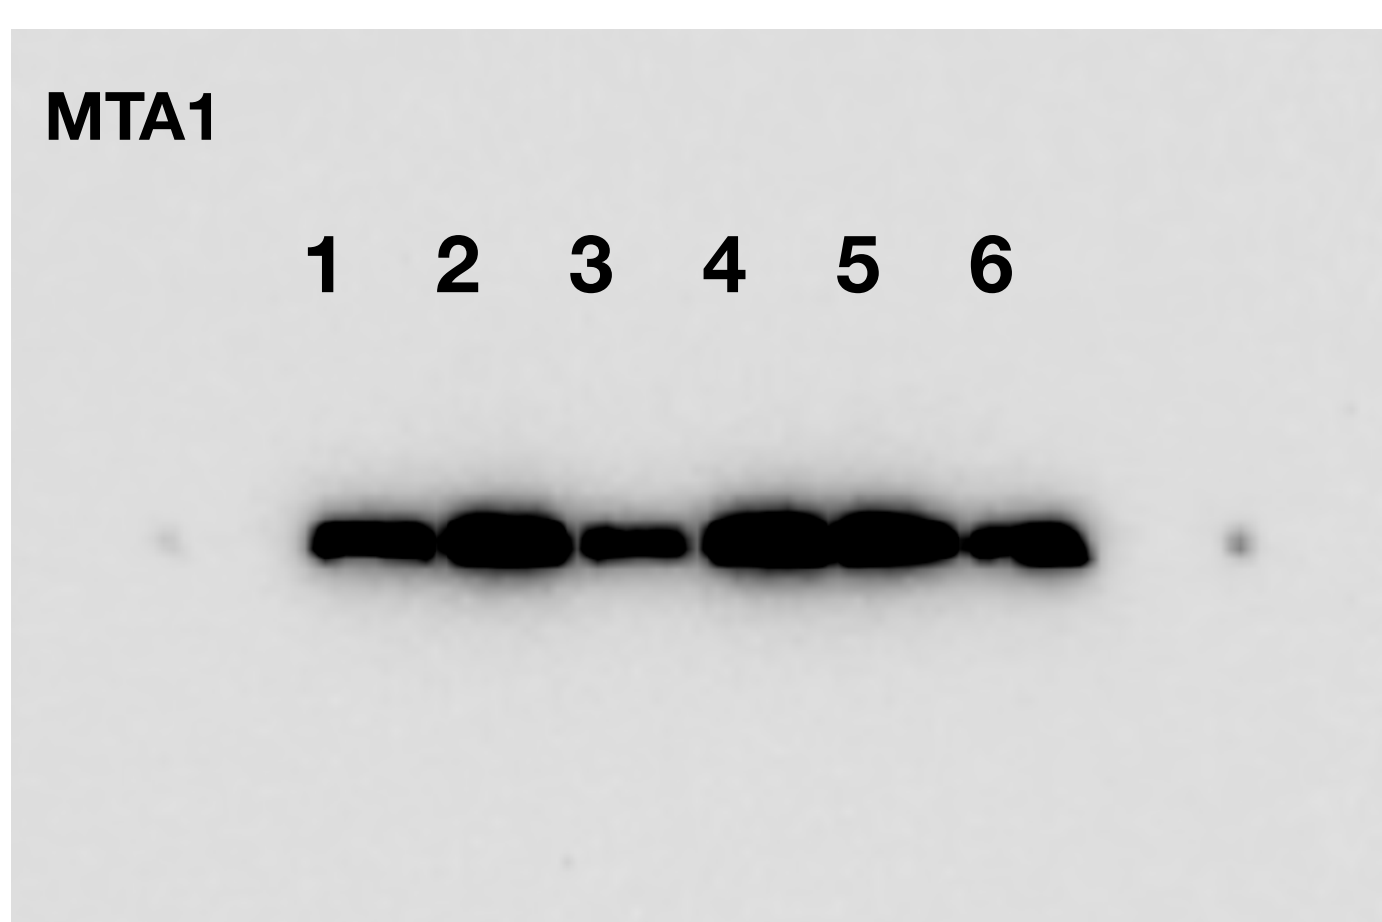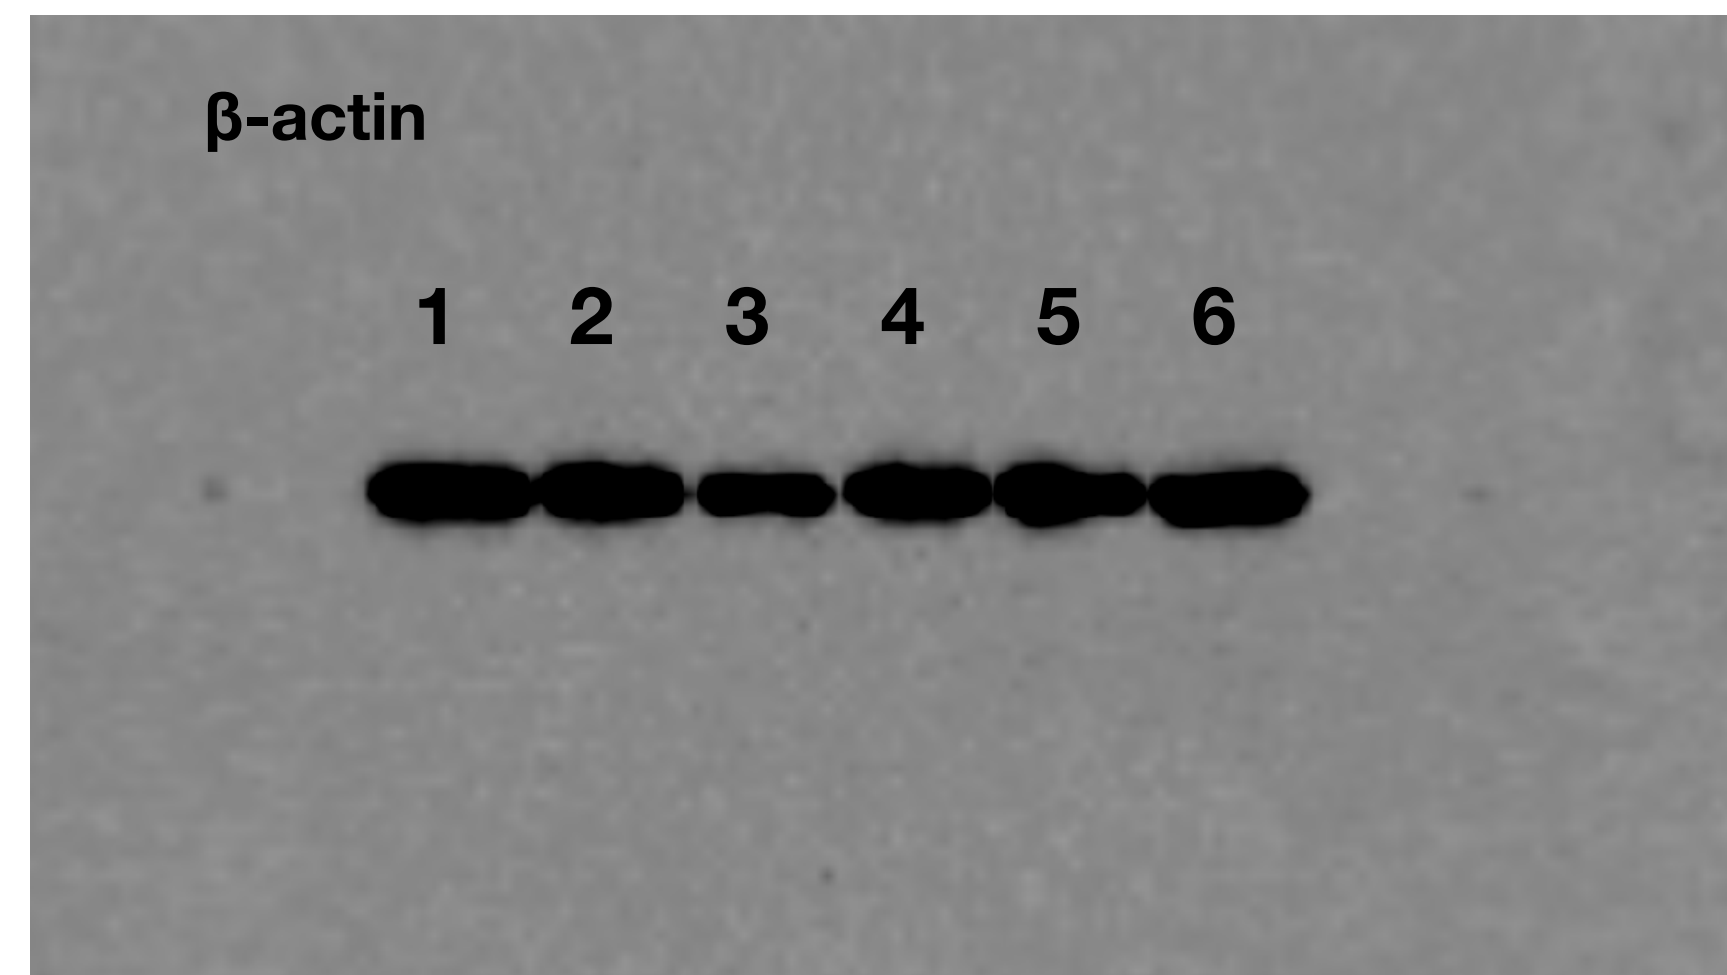

**Western blot original bands  
from Figure 5H, Group 6  
bands used for analysis**

- 1 Control**
- 2 LPS**
- 3 LPS+NA**
- 4 LPS+5-AZA**
- 5 LPS+control siRNA**
- 6 LPS+MTA1 siRNA**

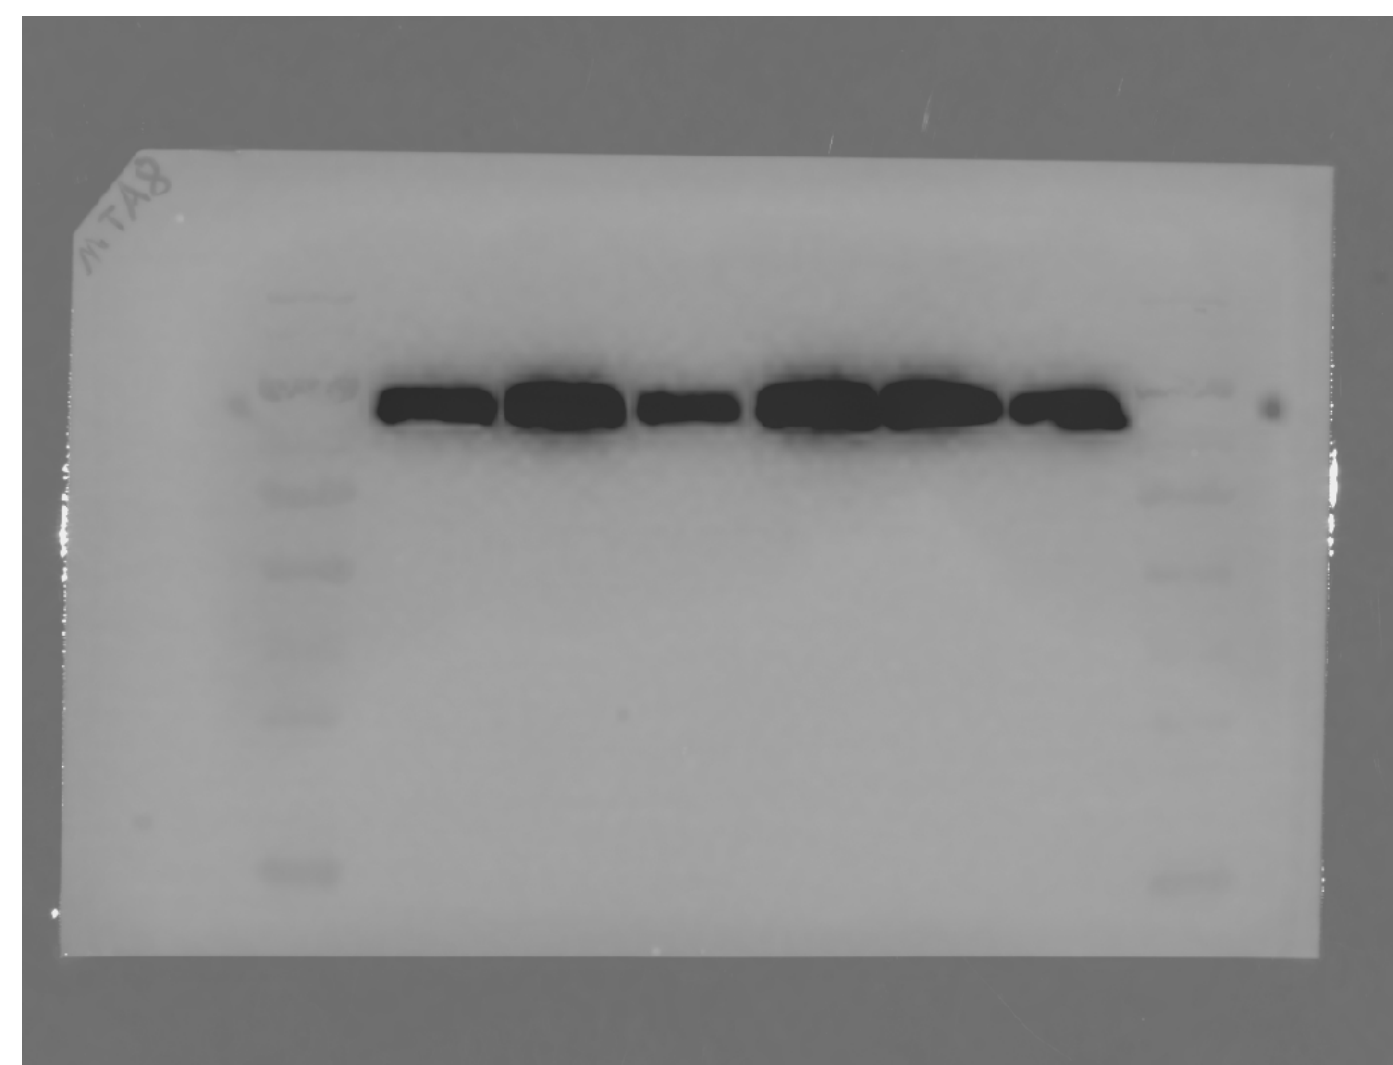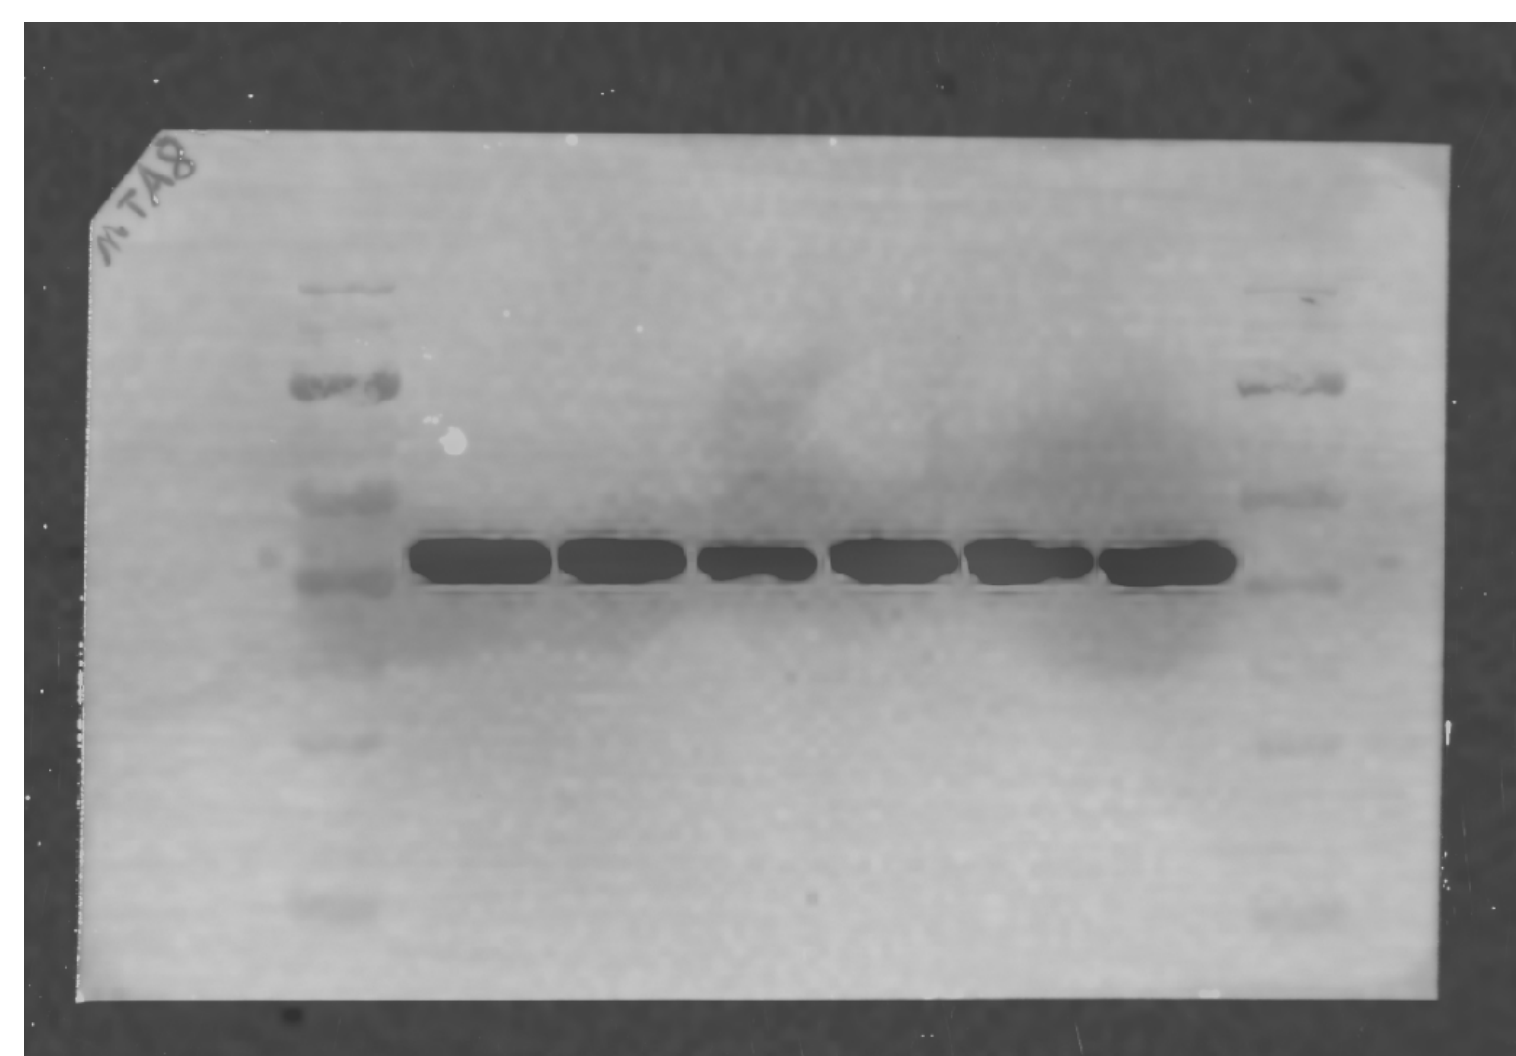

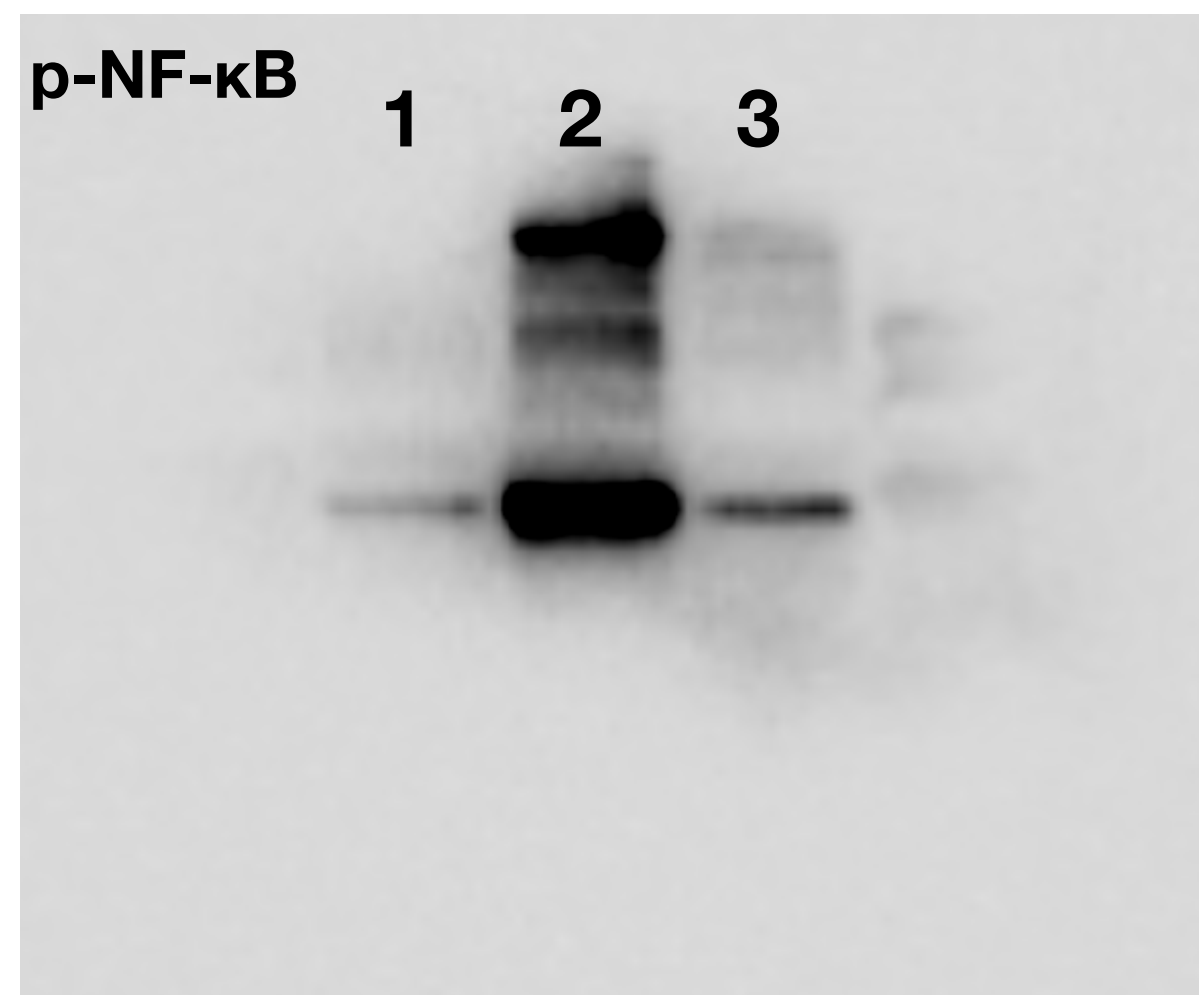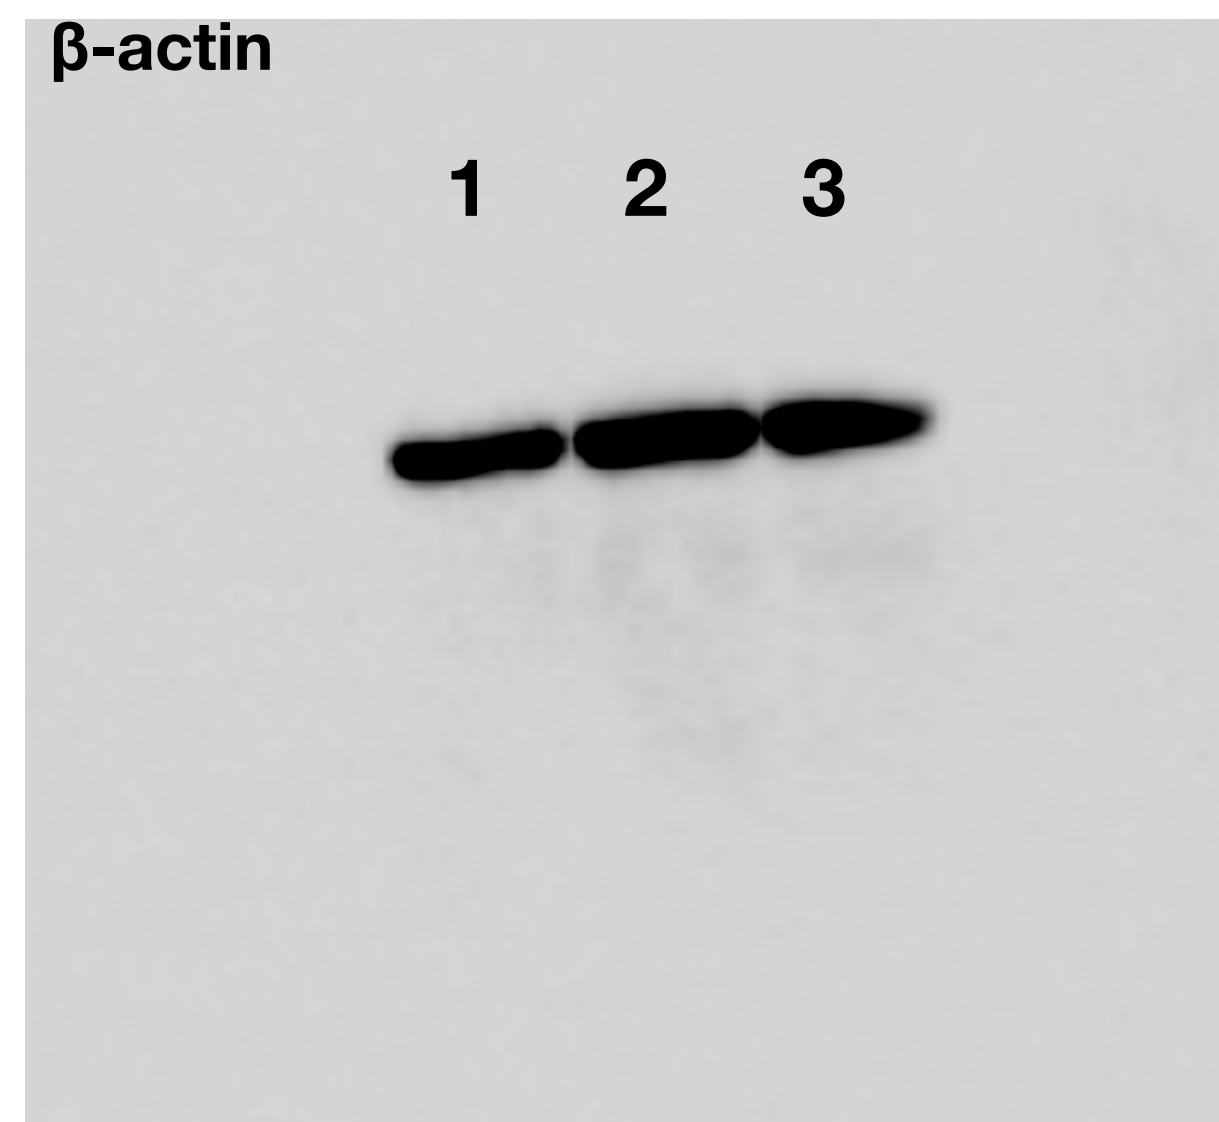

Western blot original bands  
from Figure 6A, Group 1  
bands used for analysis

1 Control

2 LPS

3 LPS+NA

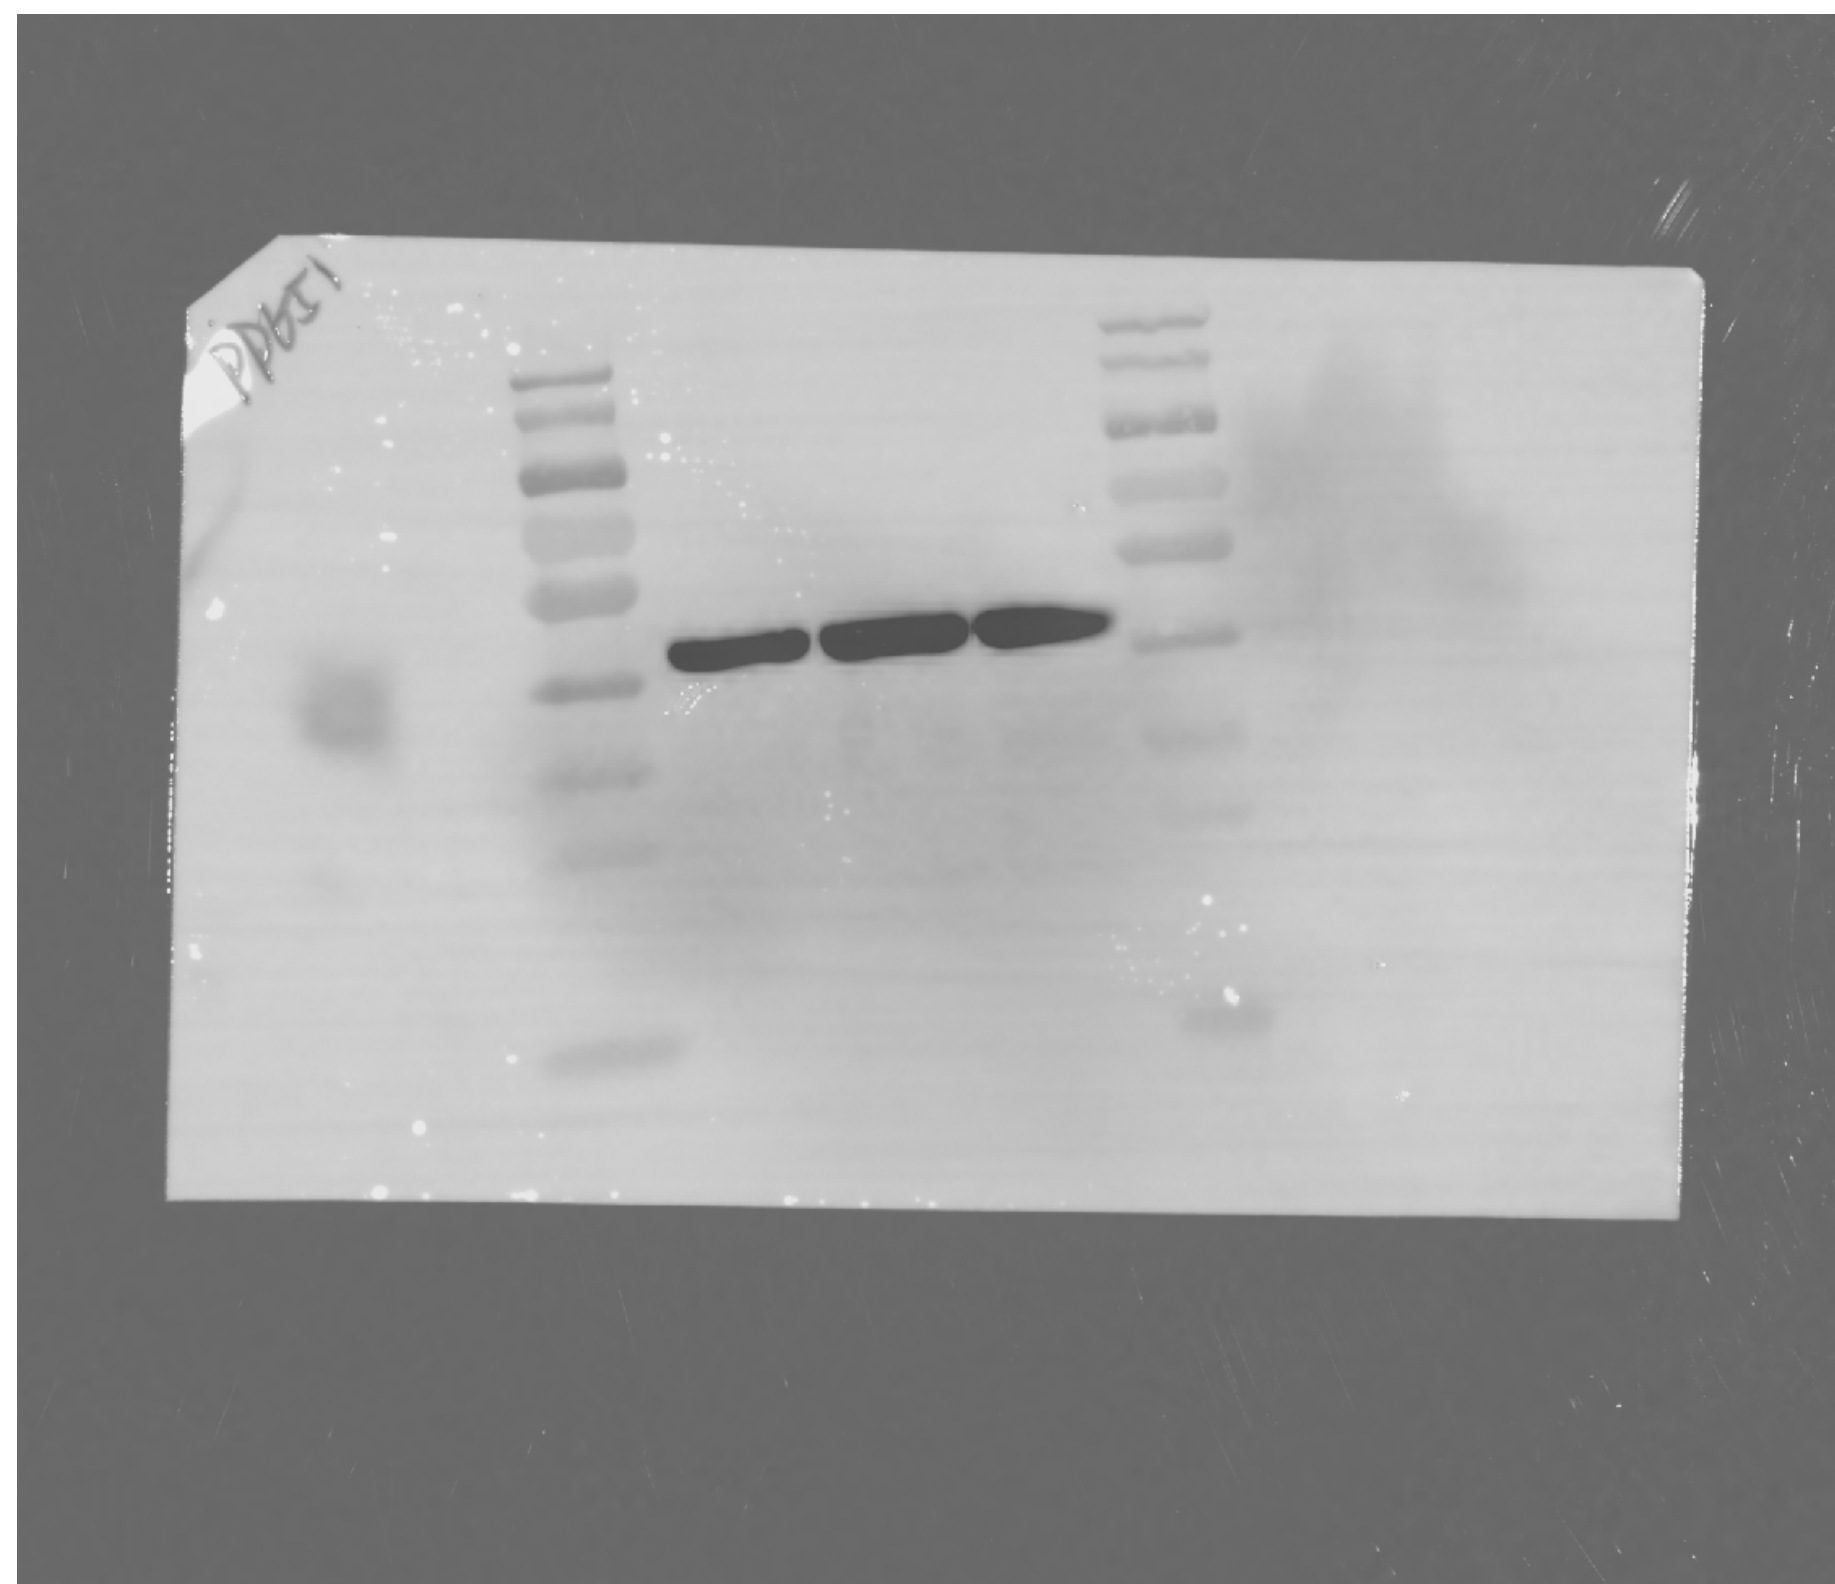

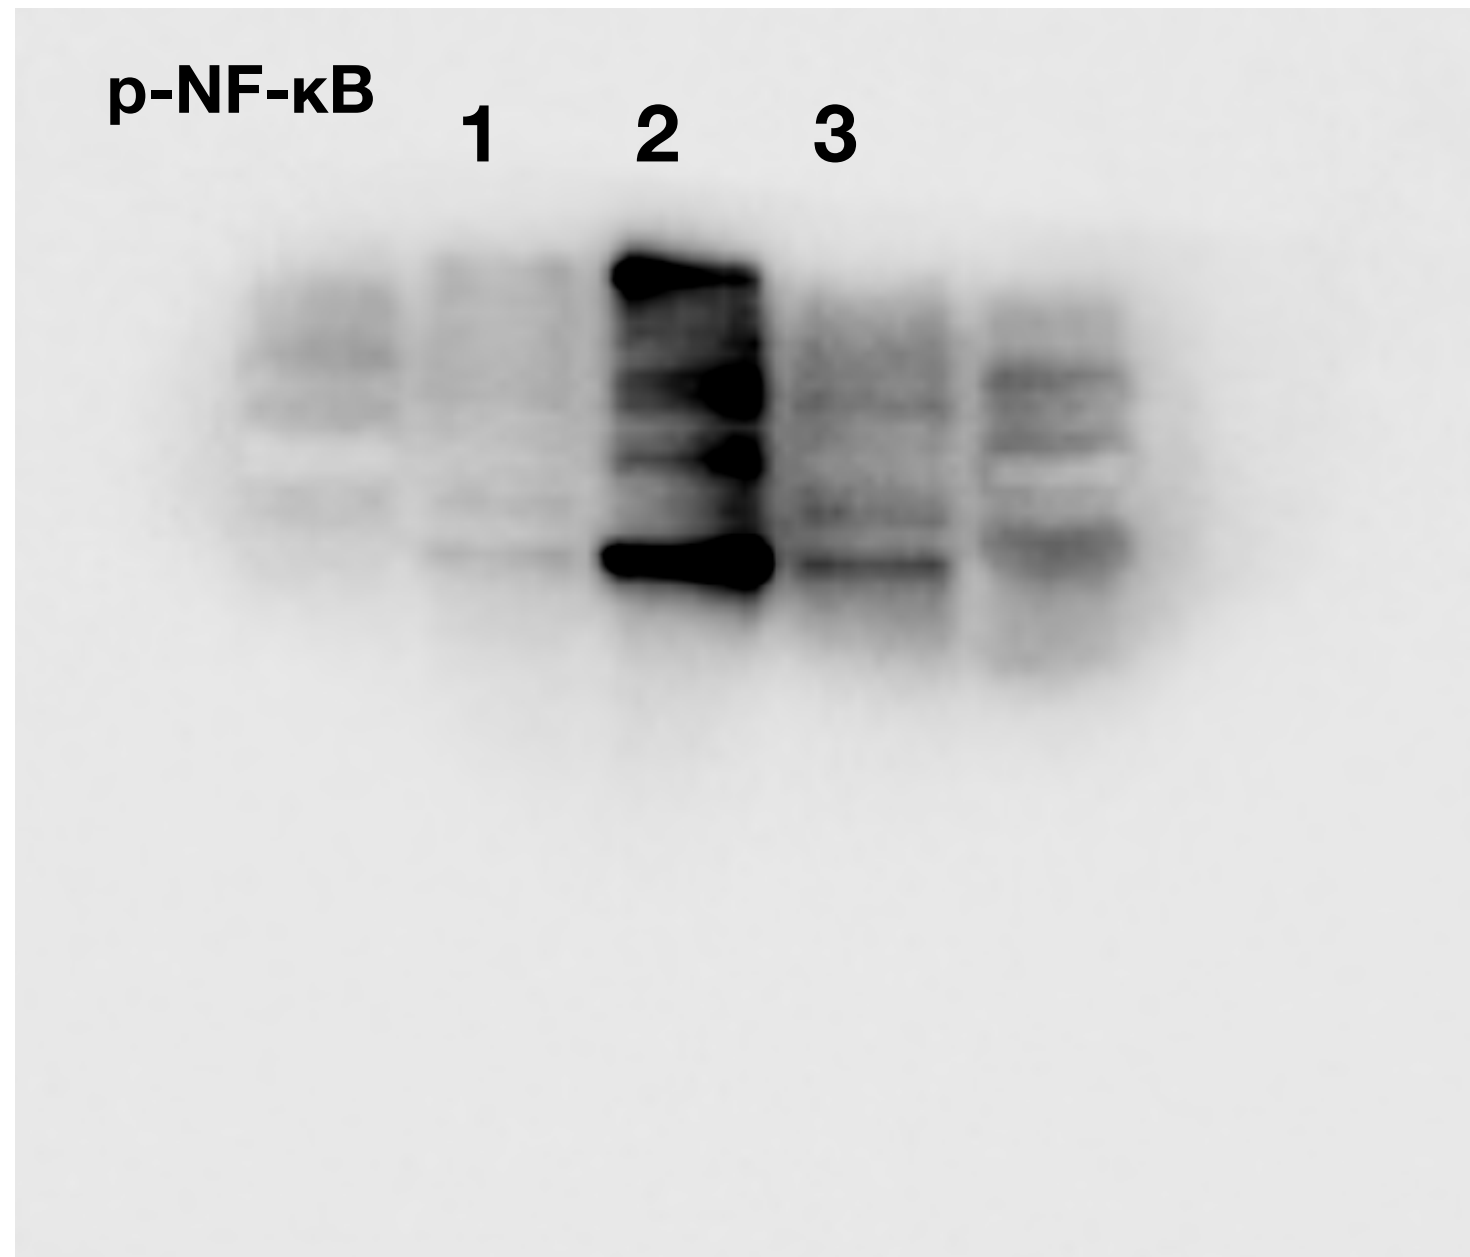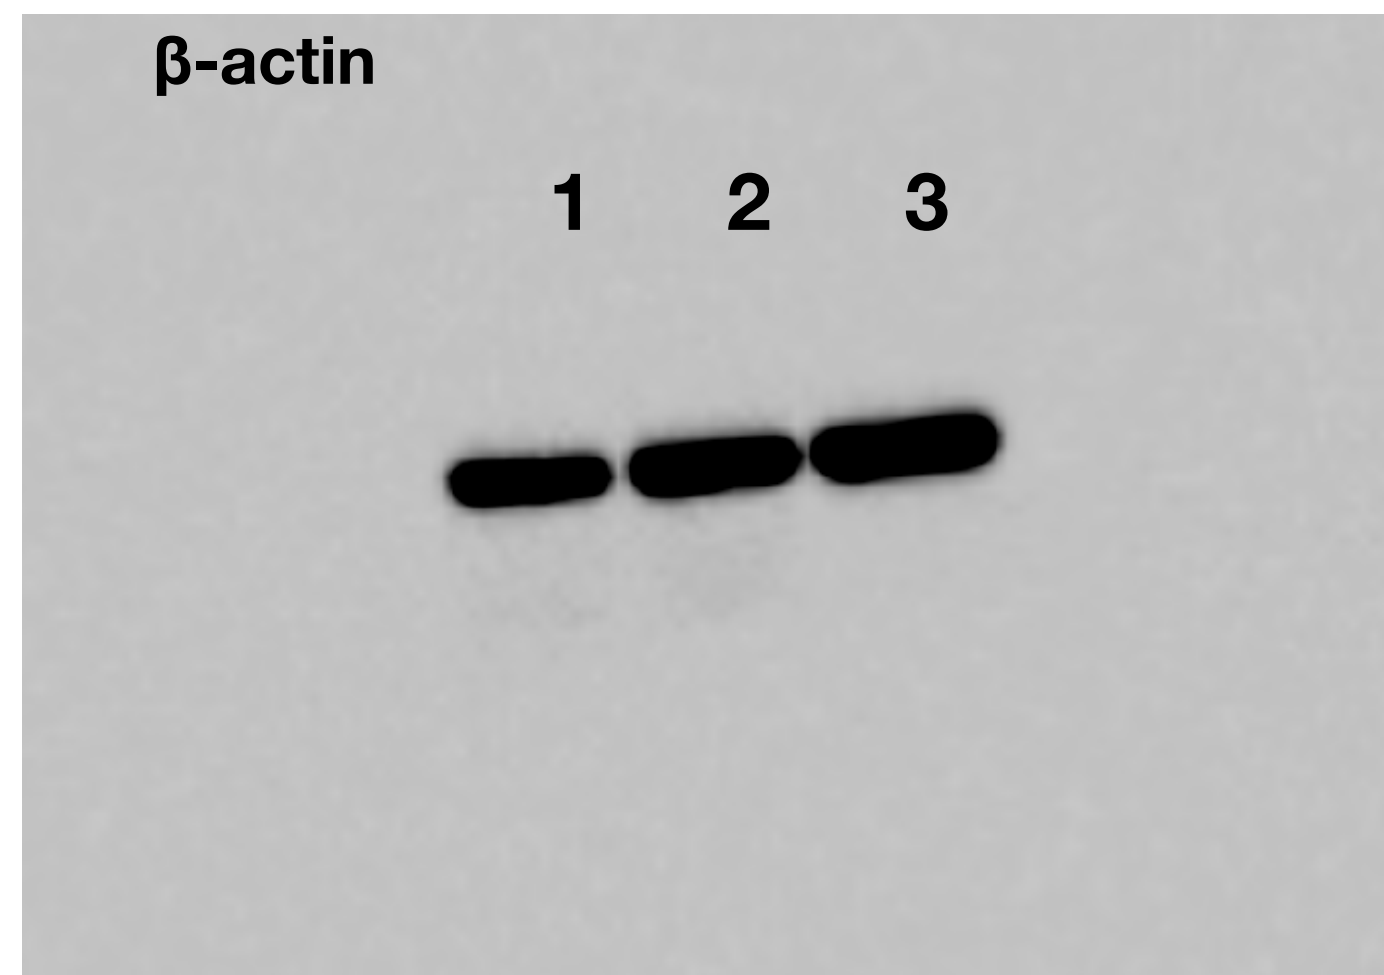

**Western blot original bands  
from Figure 6A, Group 2  
bands used for analysis**

**1 Control**

**2 LPS**

**3 LPS+NA**

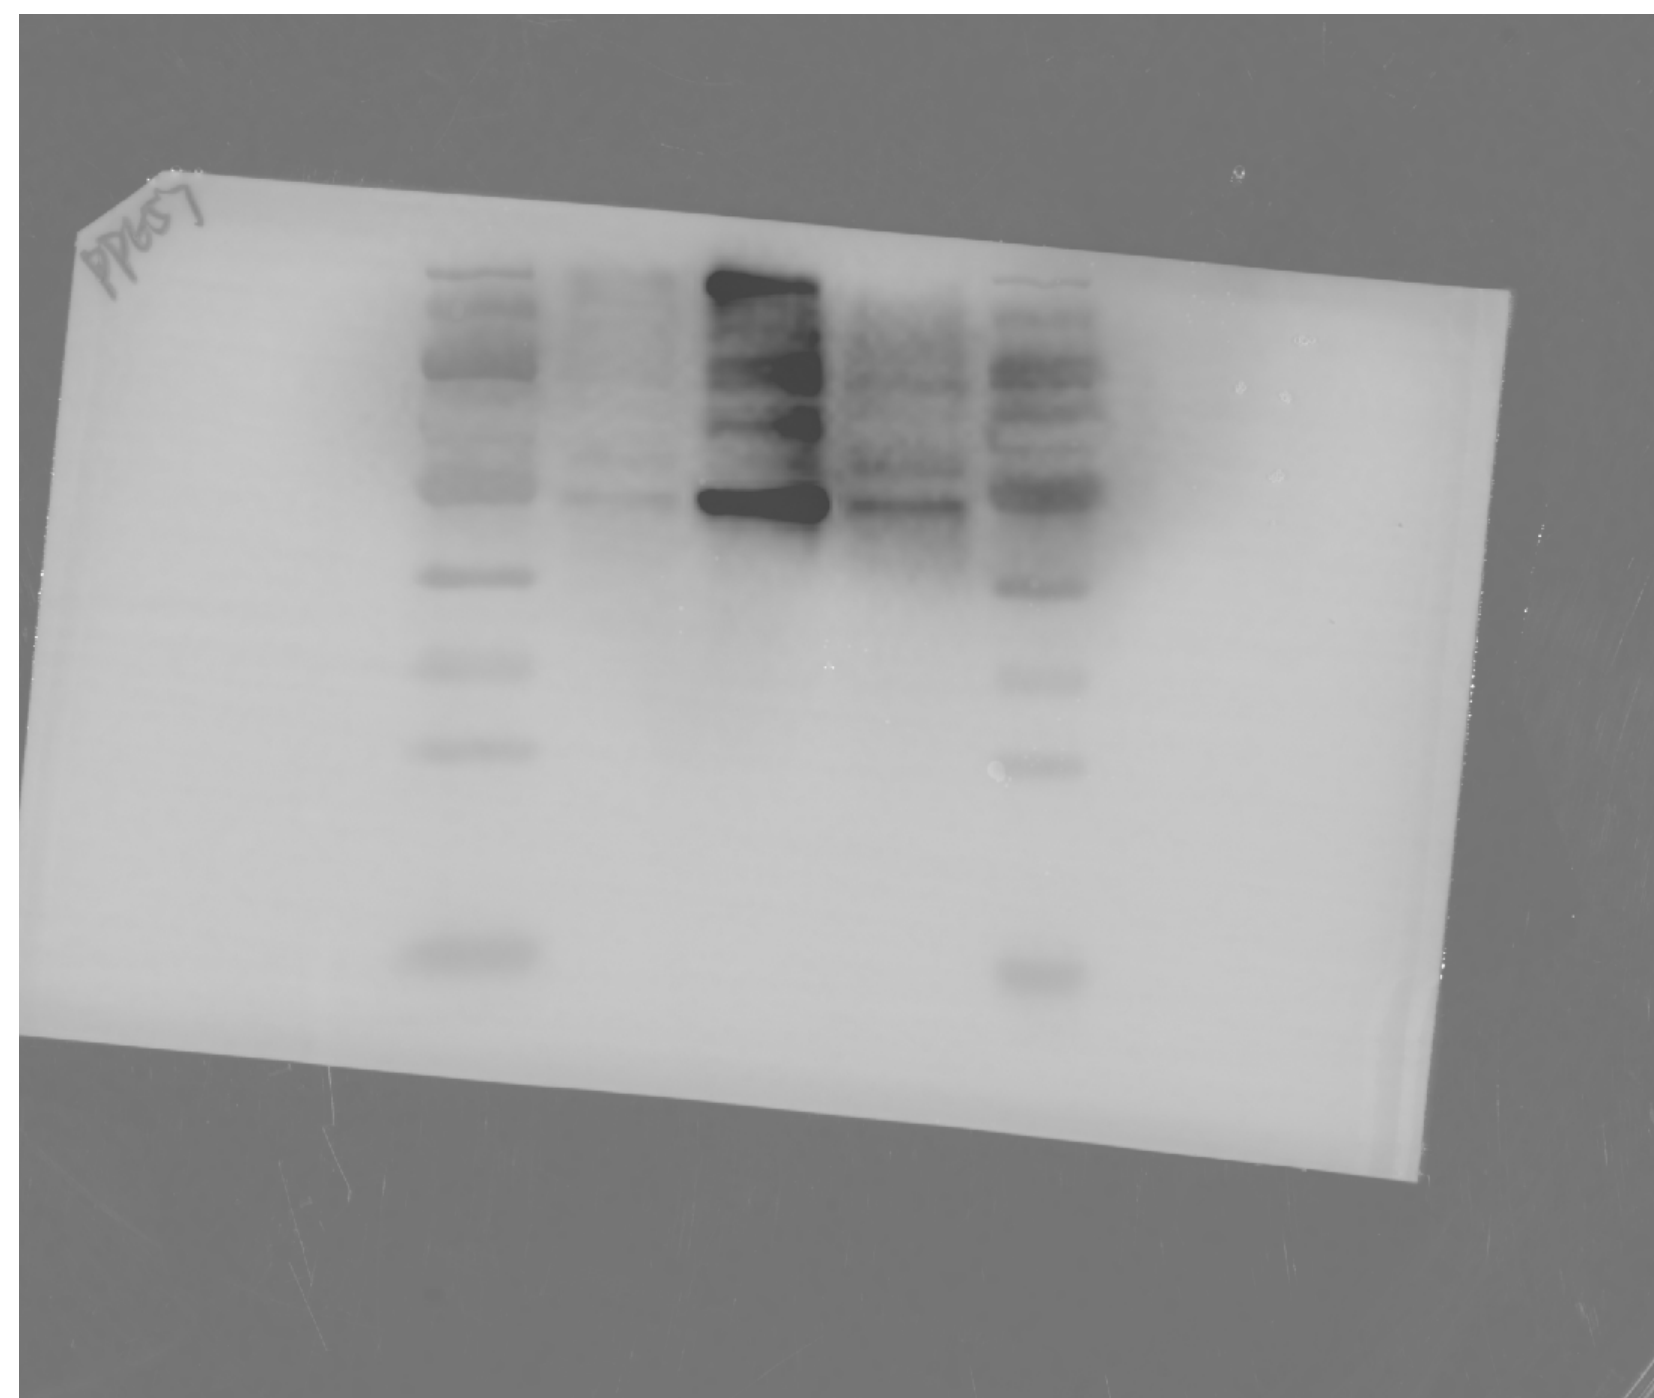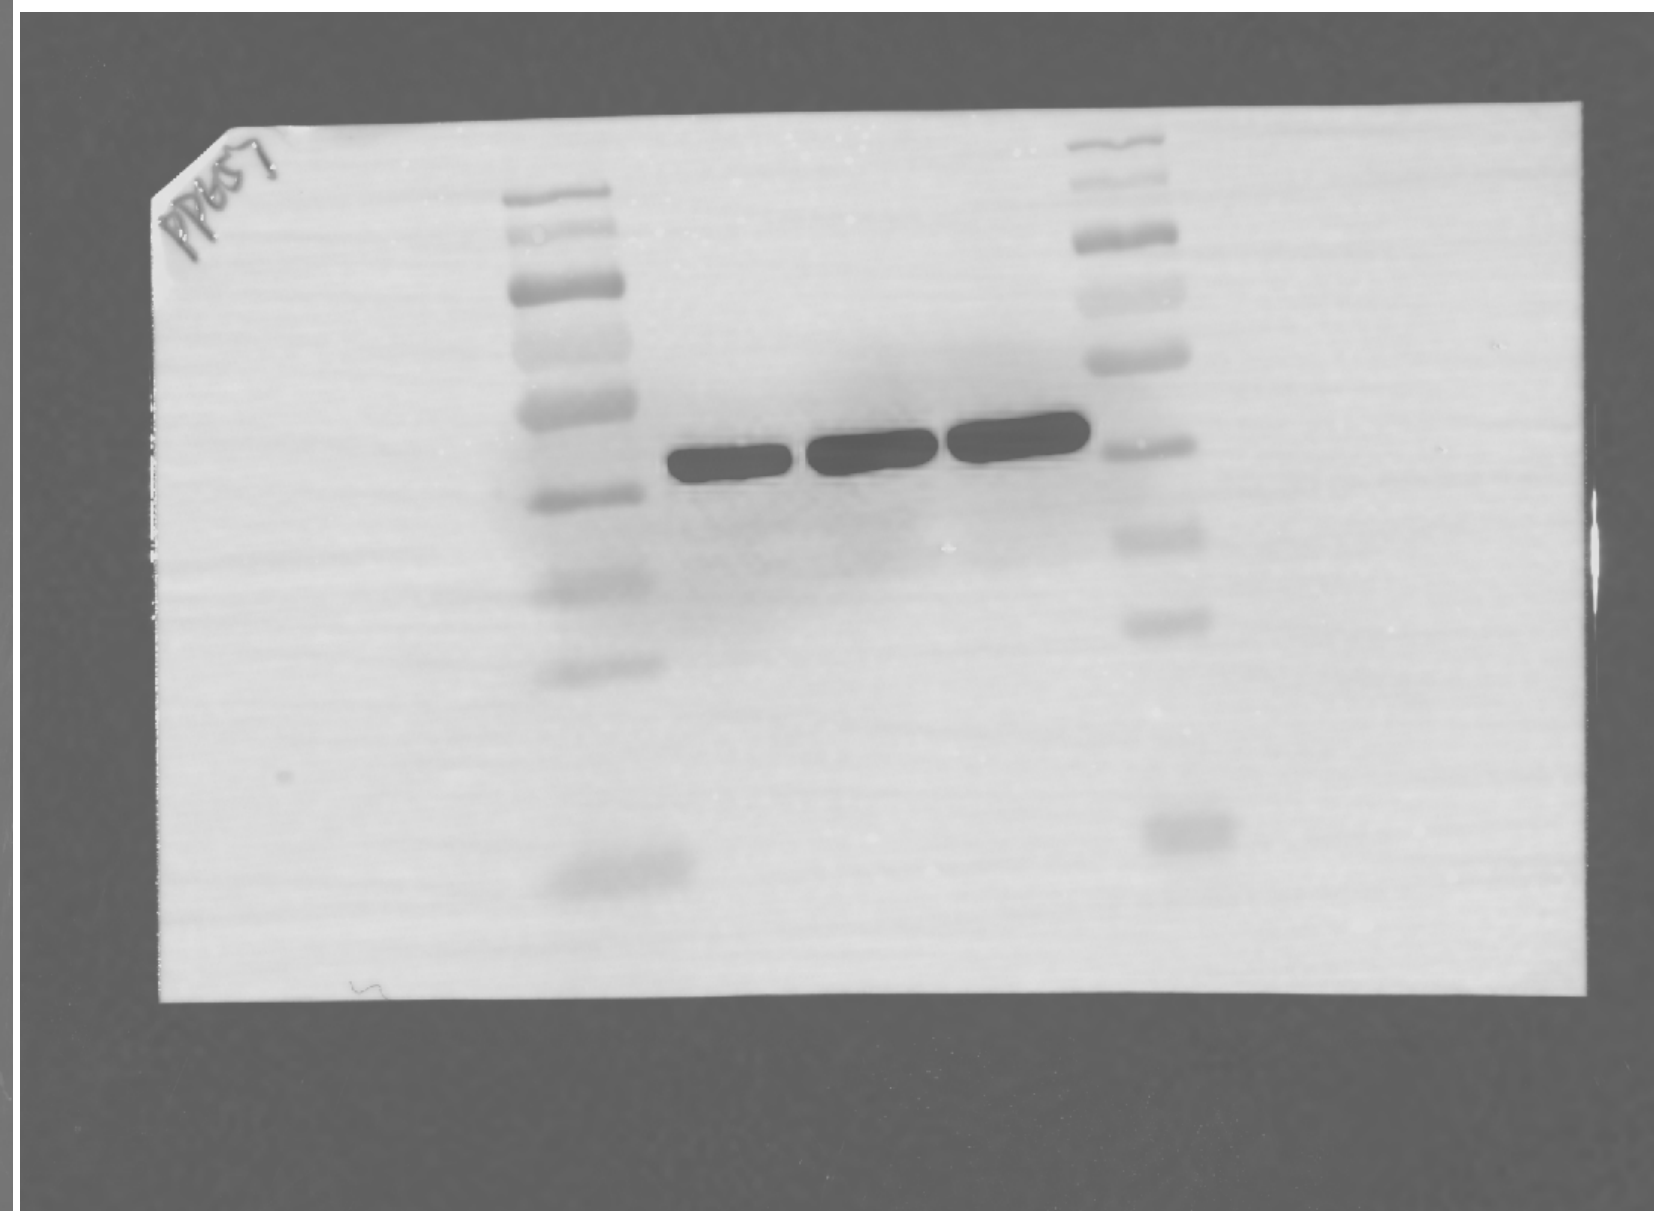



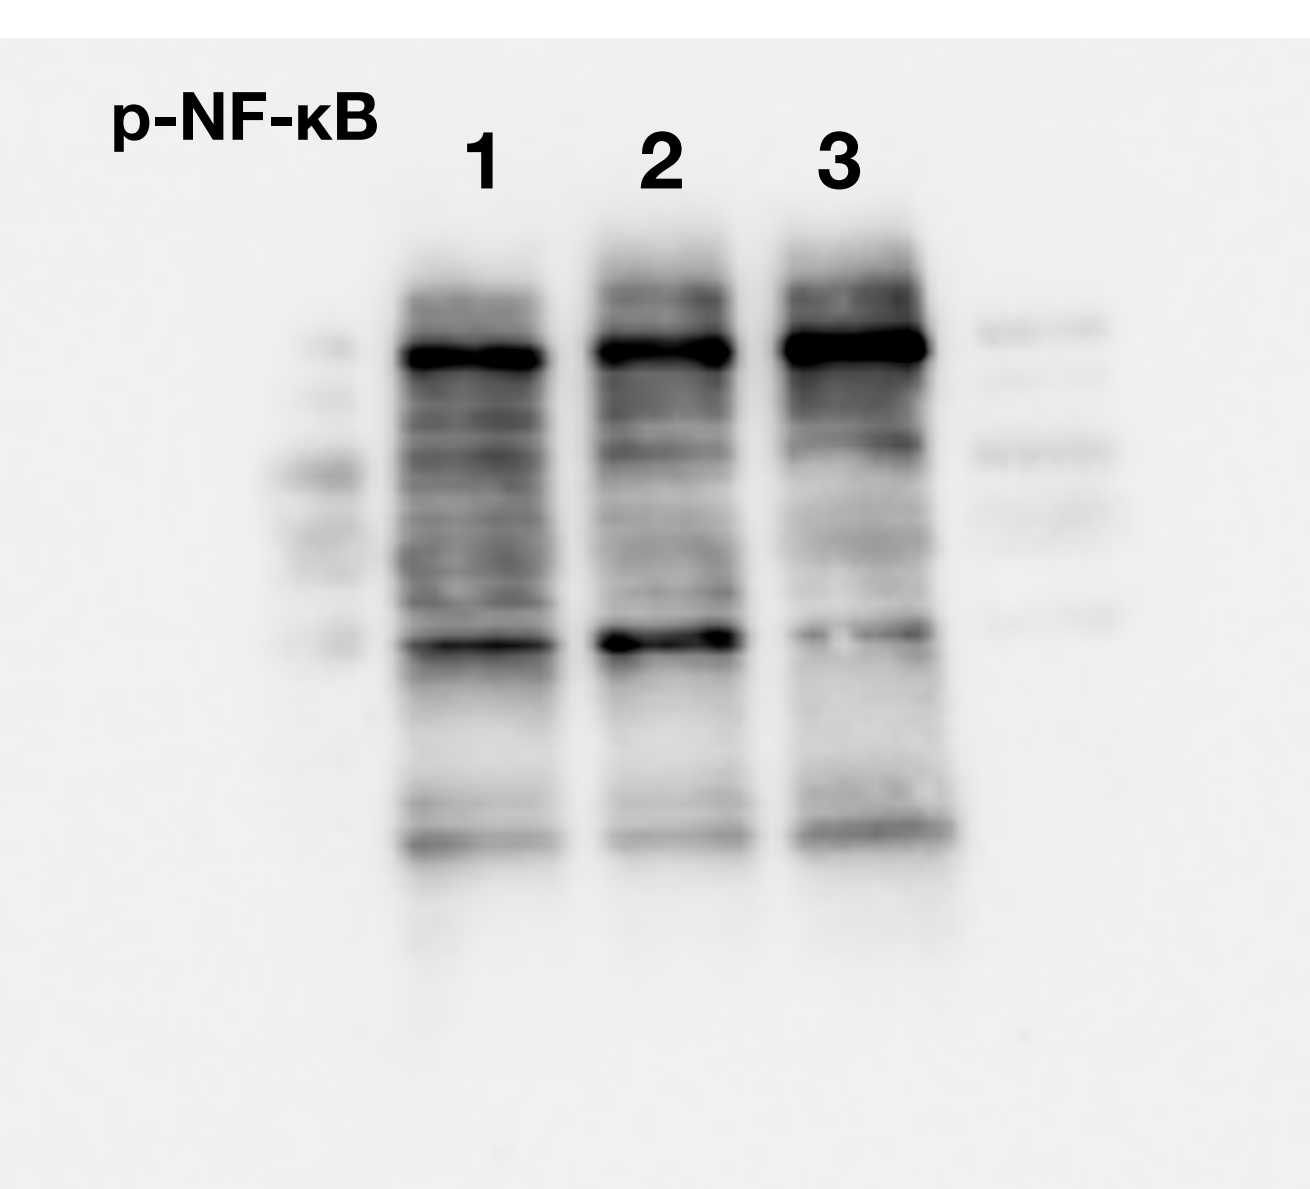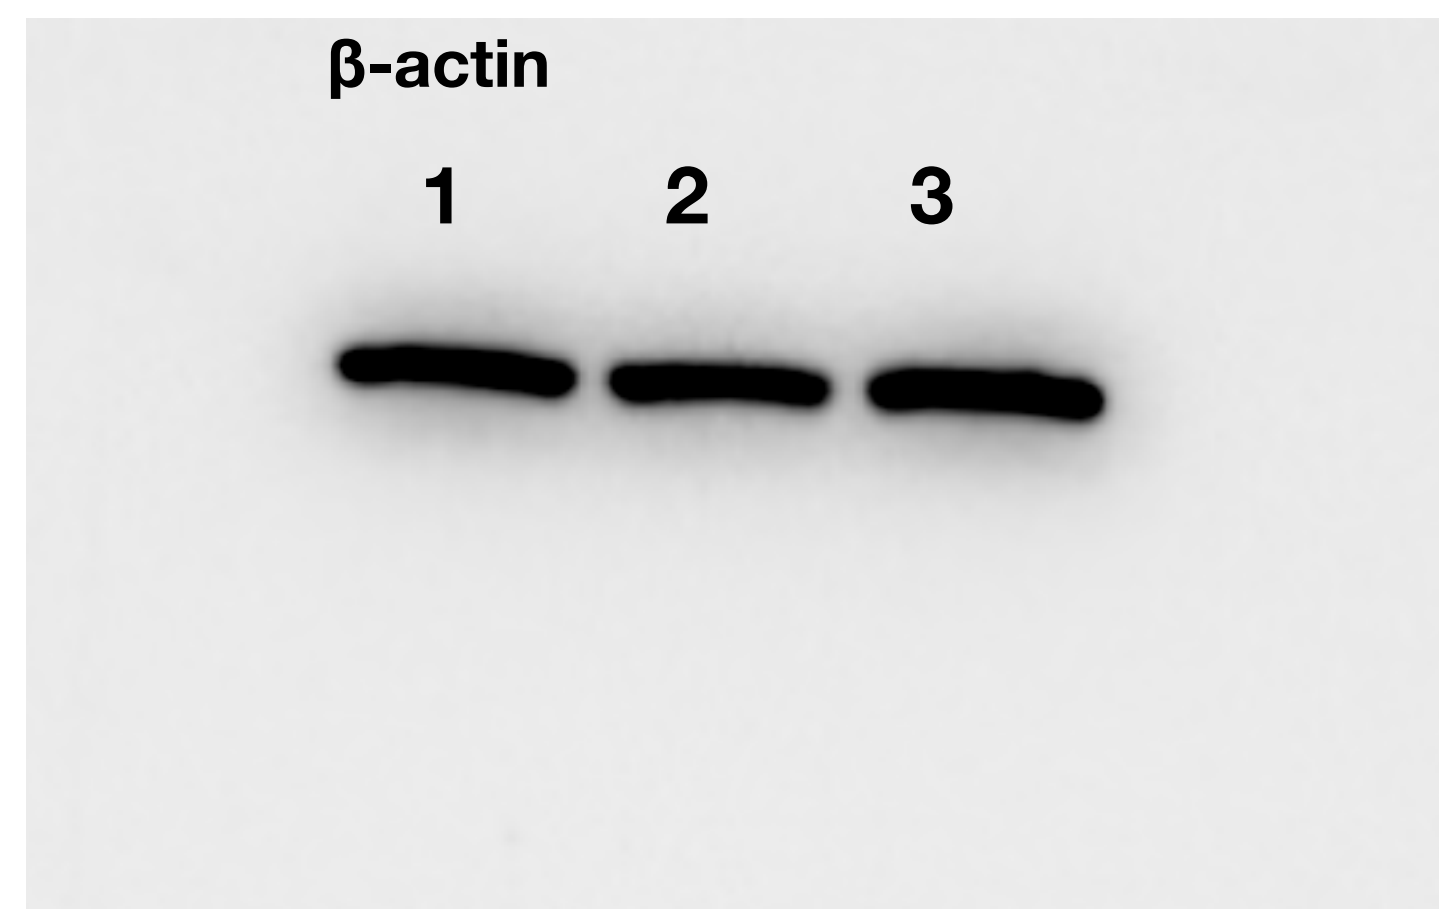

**Western blot original bands  
from Figure 6A, Group 3  
bands used for analysis**

**1 Control**

**2 LPS**

**3 LPS+NA**

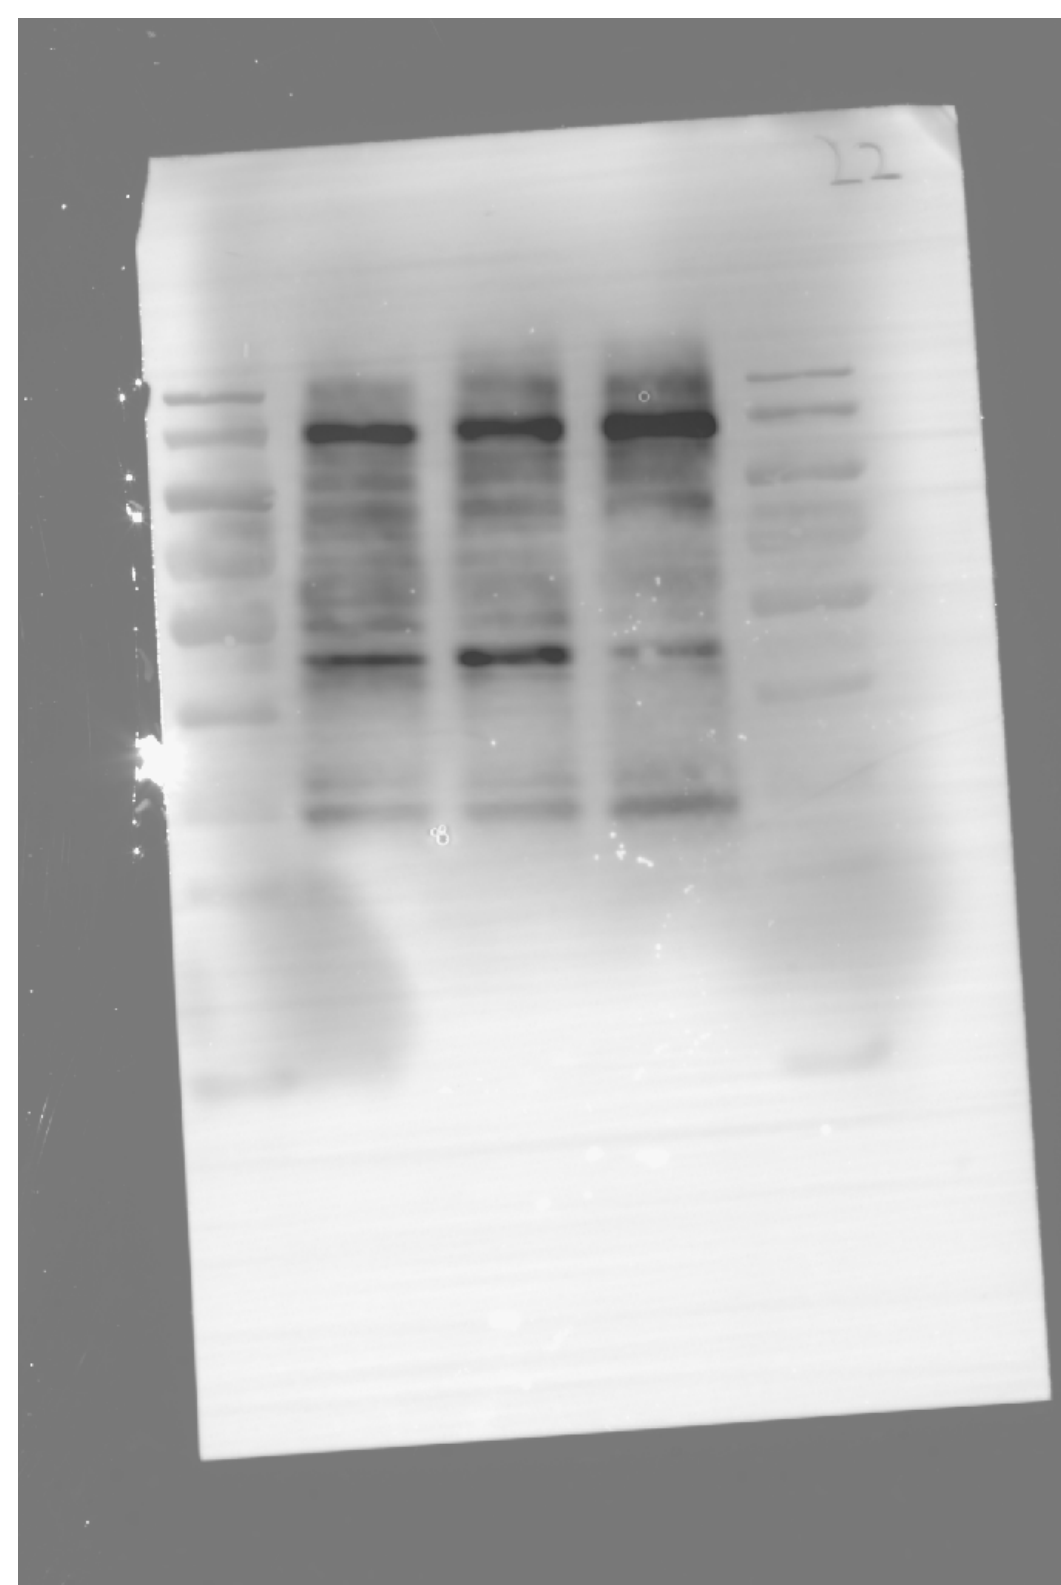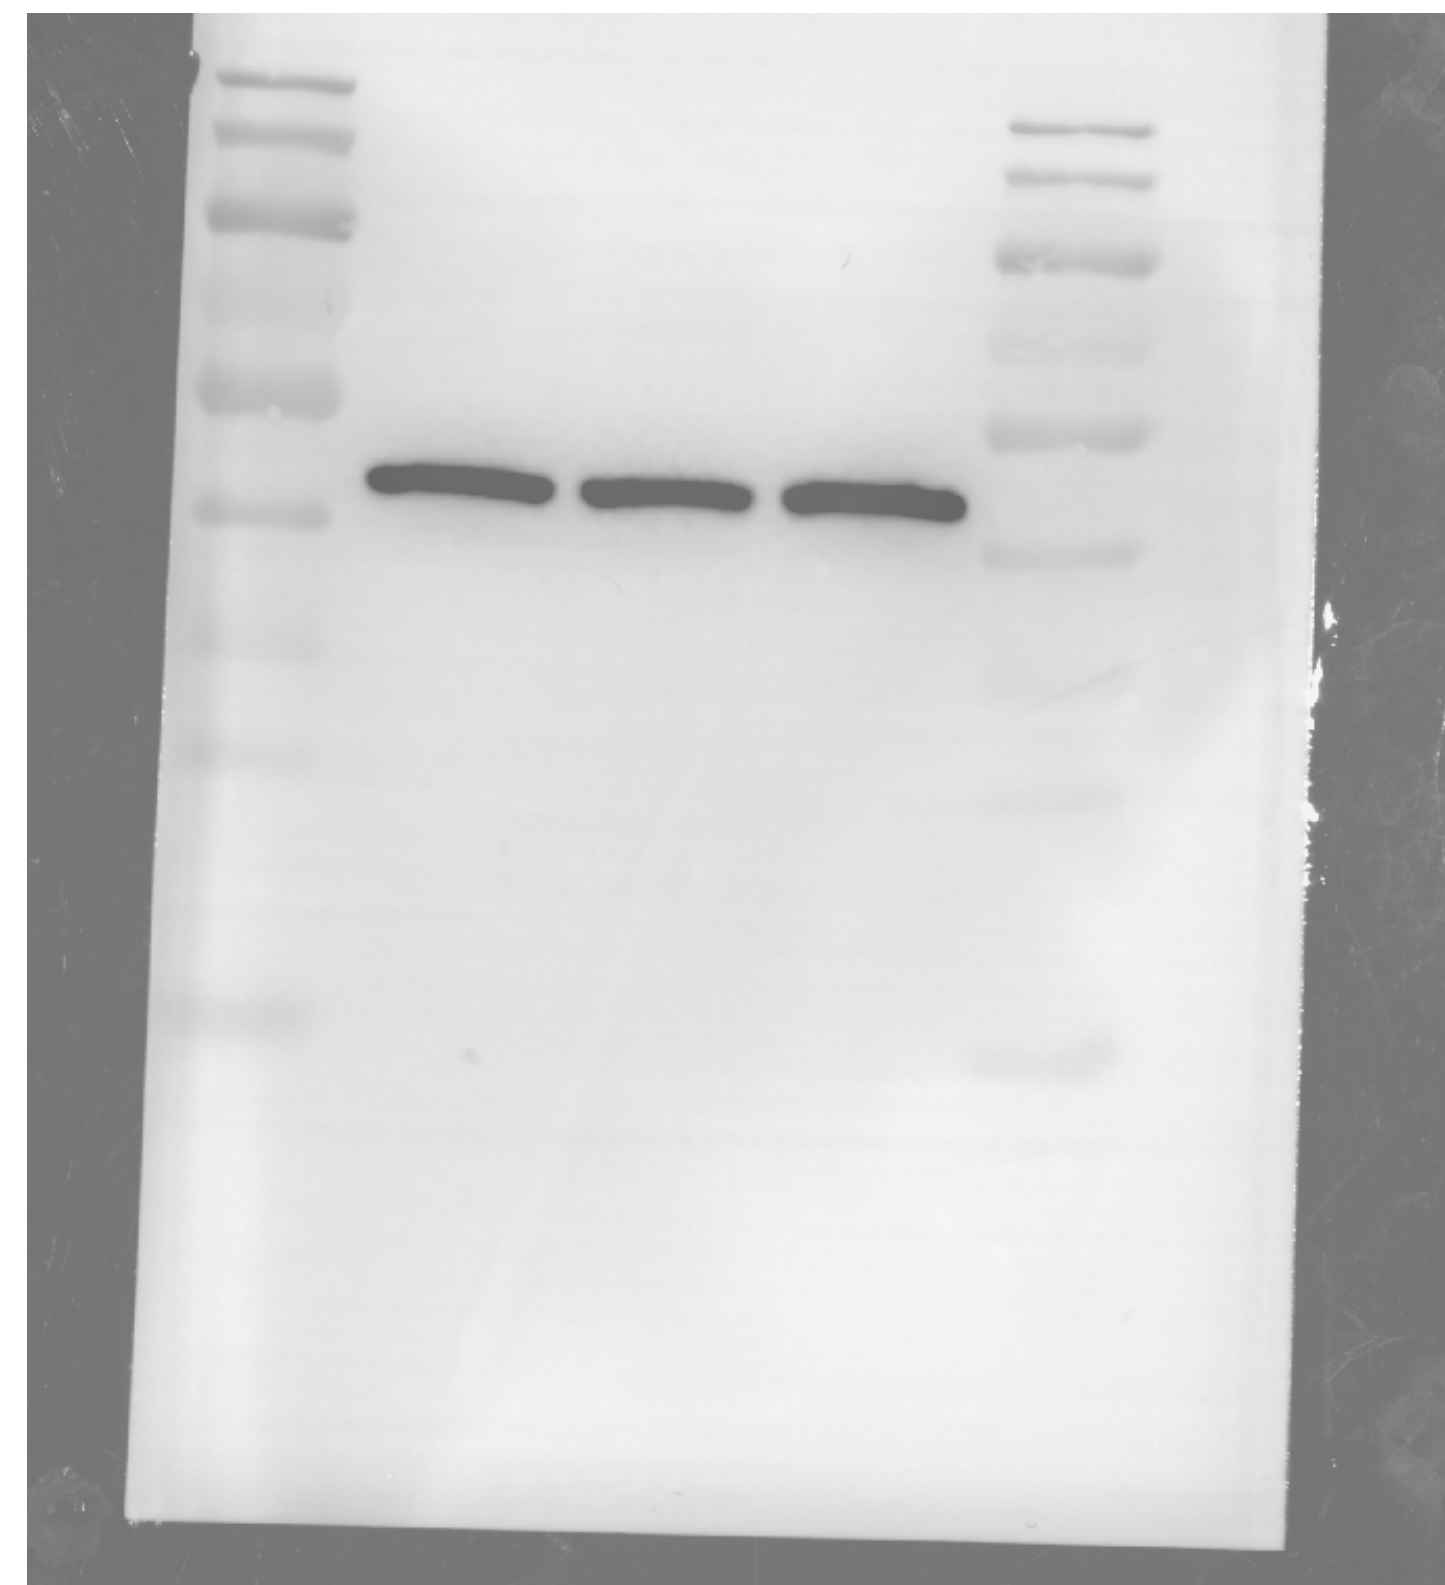



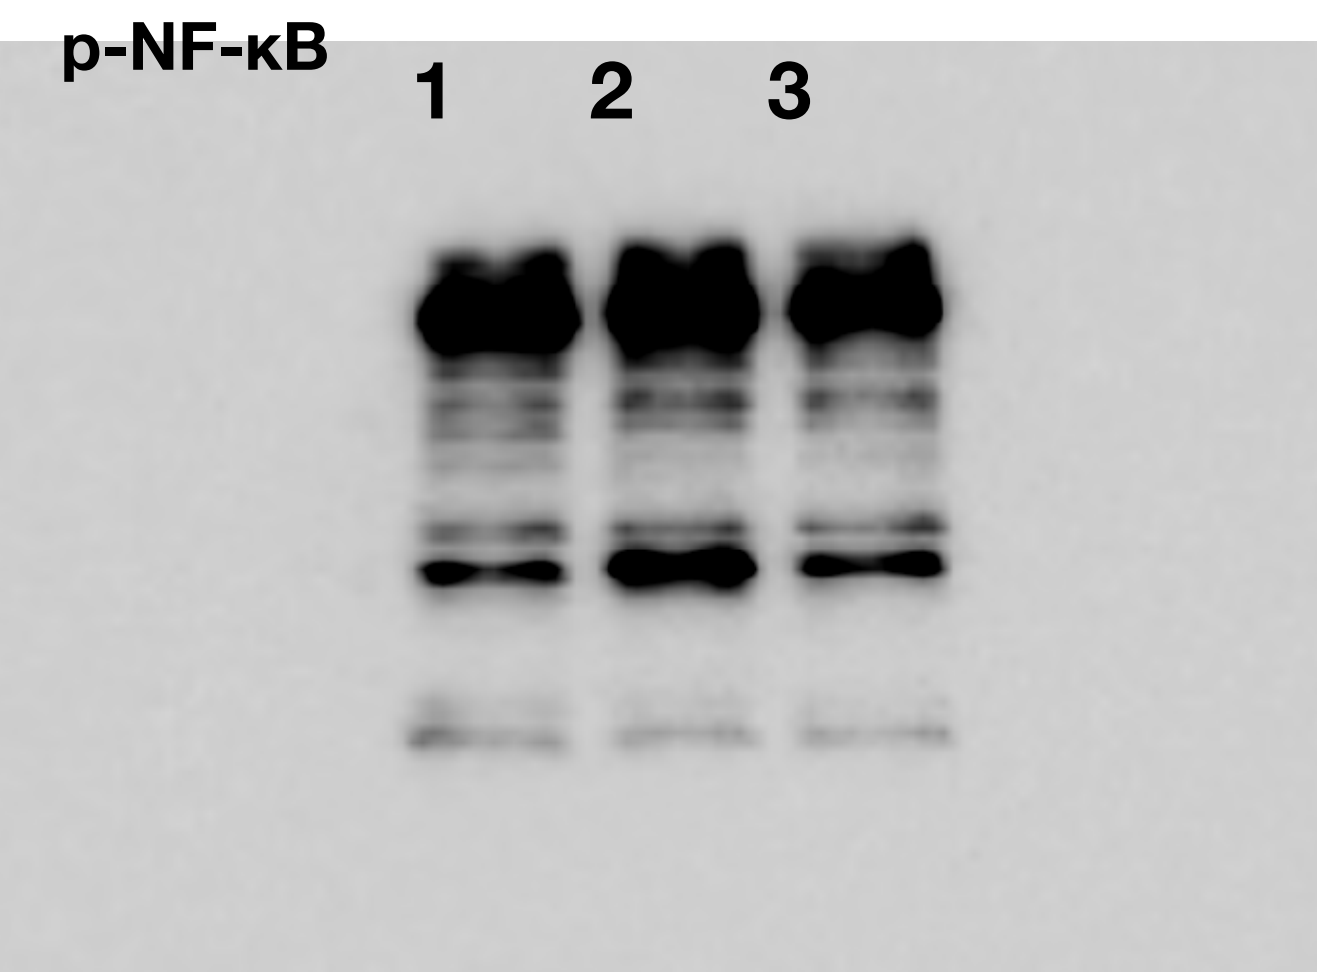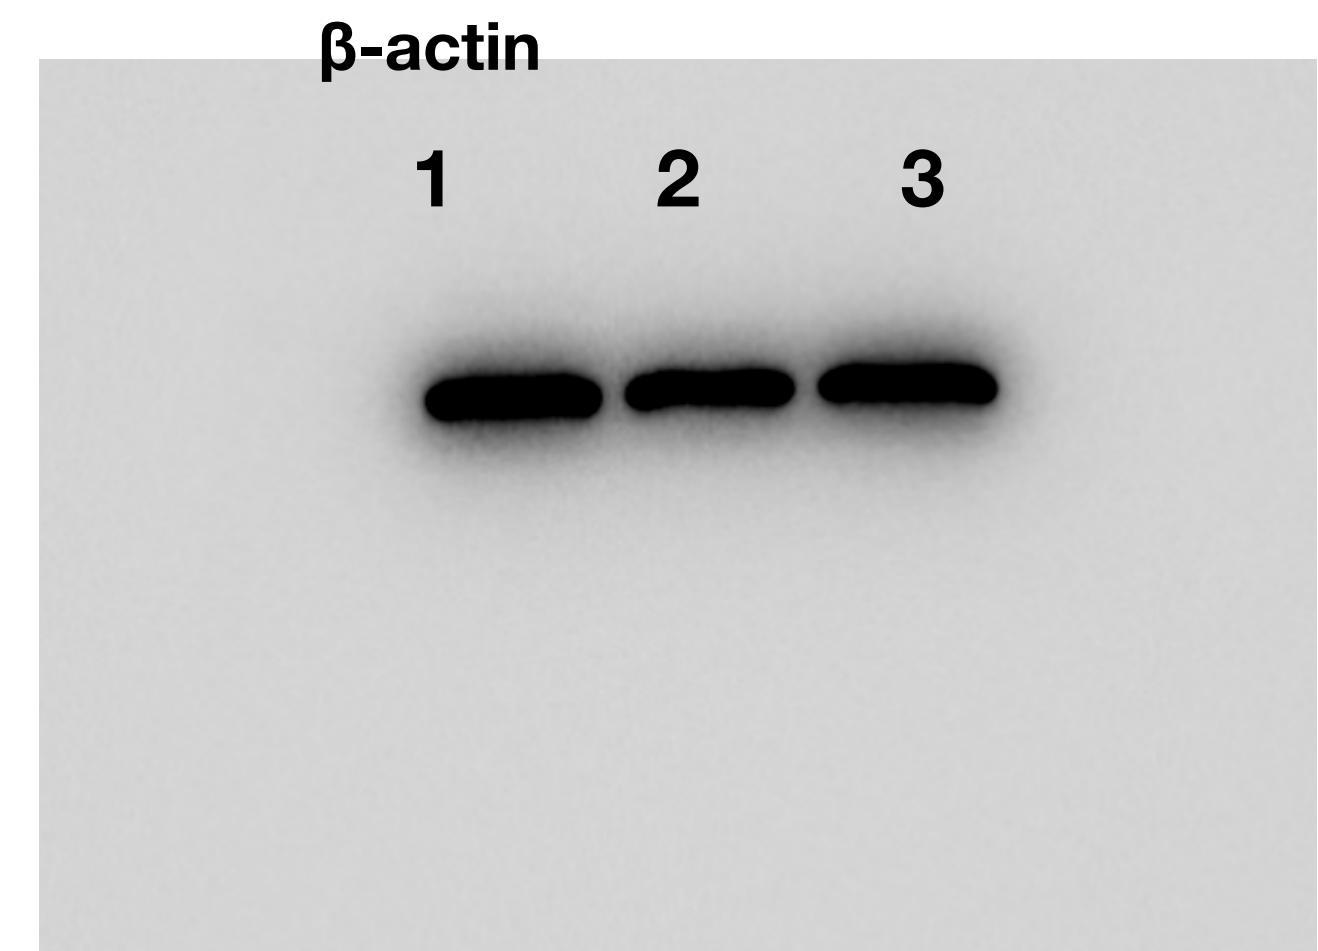

Western blot original bands  
from Figure 6D, Group 1  
bands used for analysis

- 1 Control
- 2 LPS+control siRNA
- 3 LPS+MTA1 siRNA

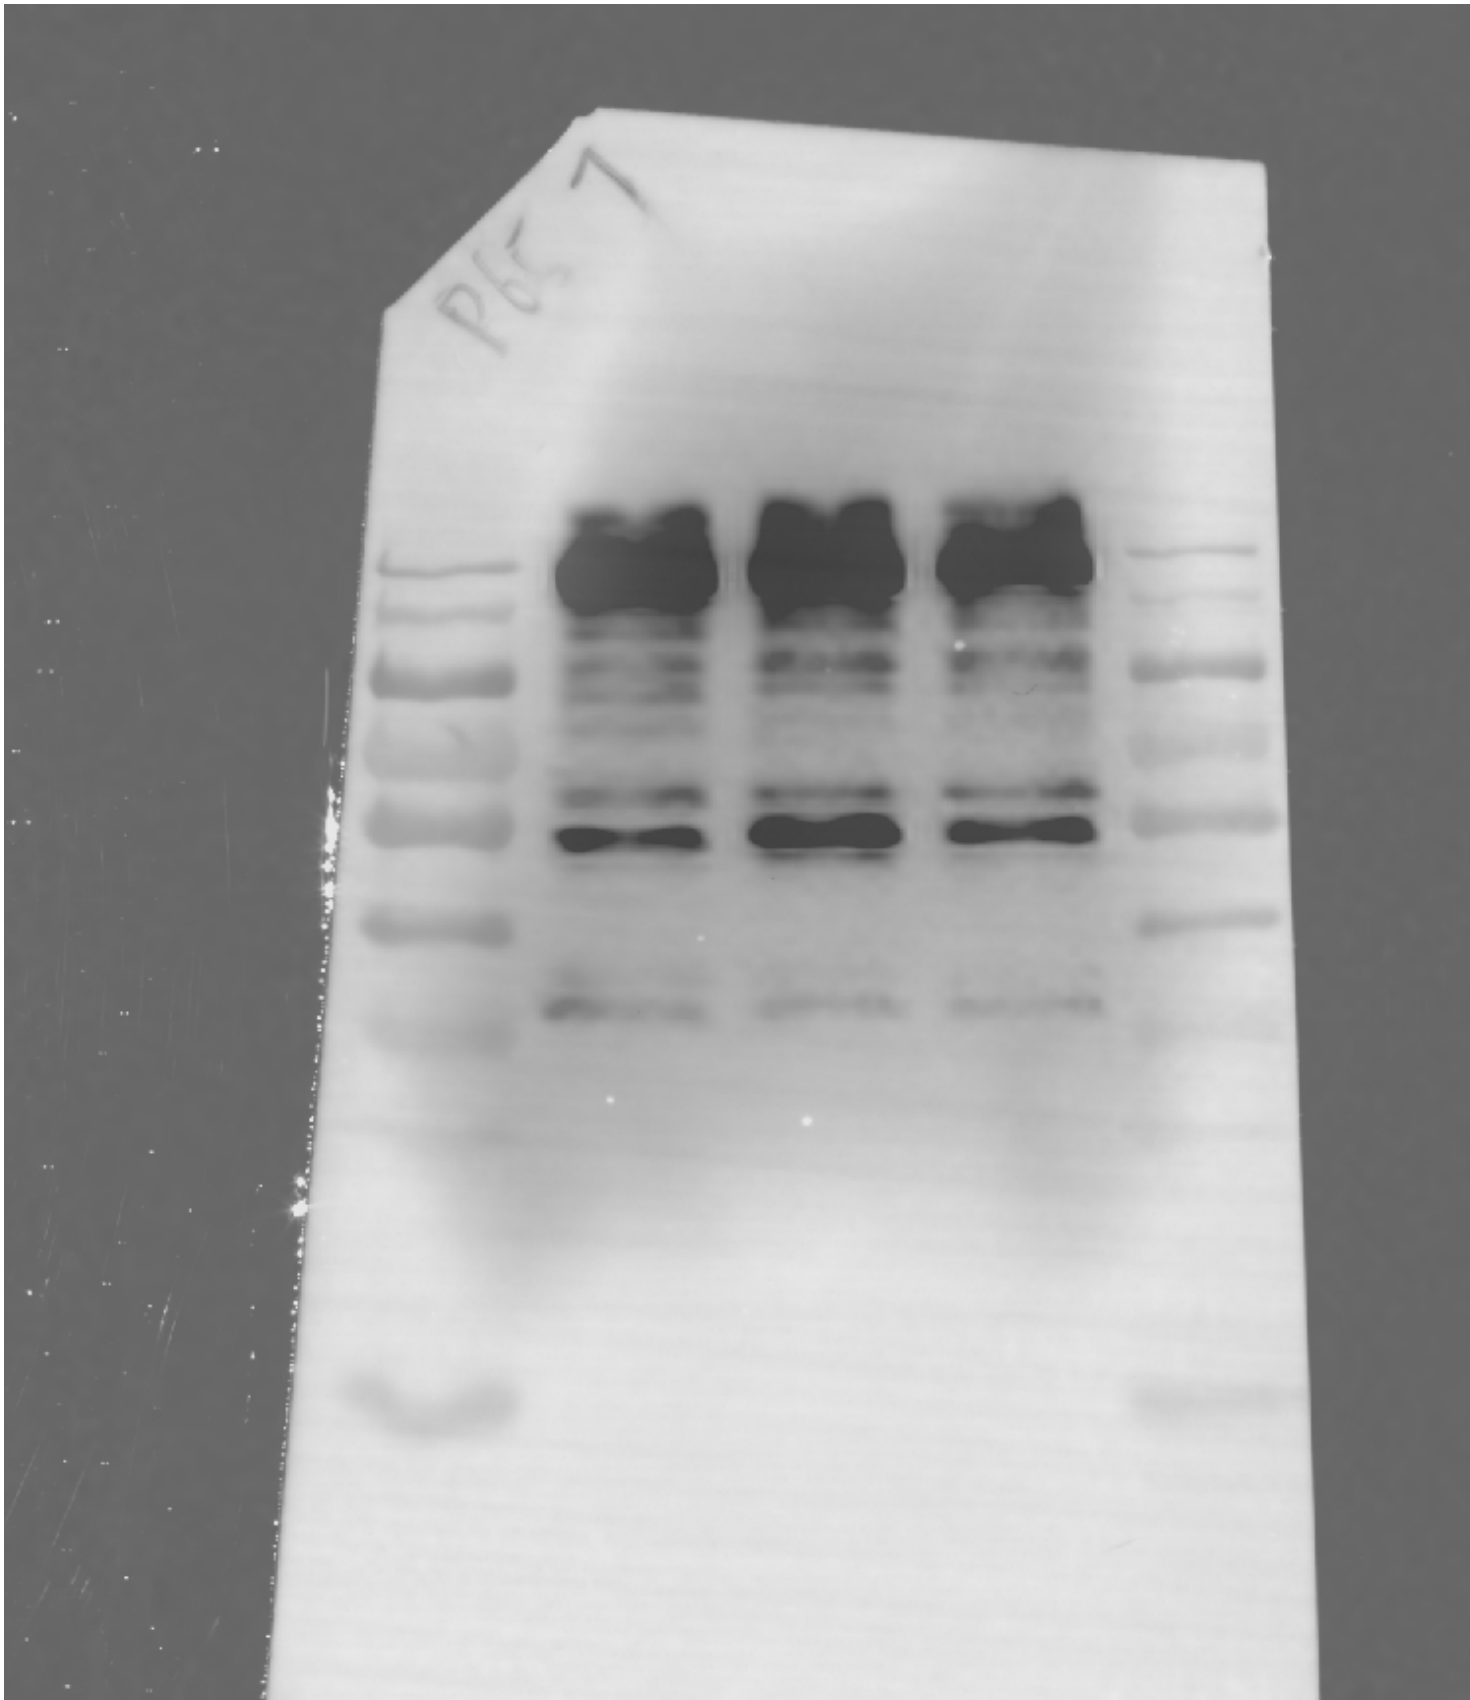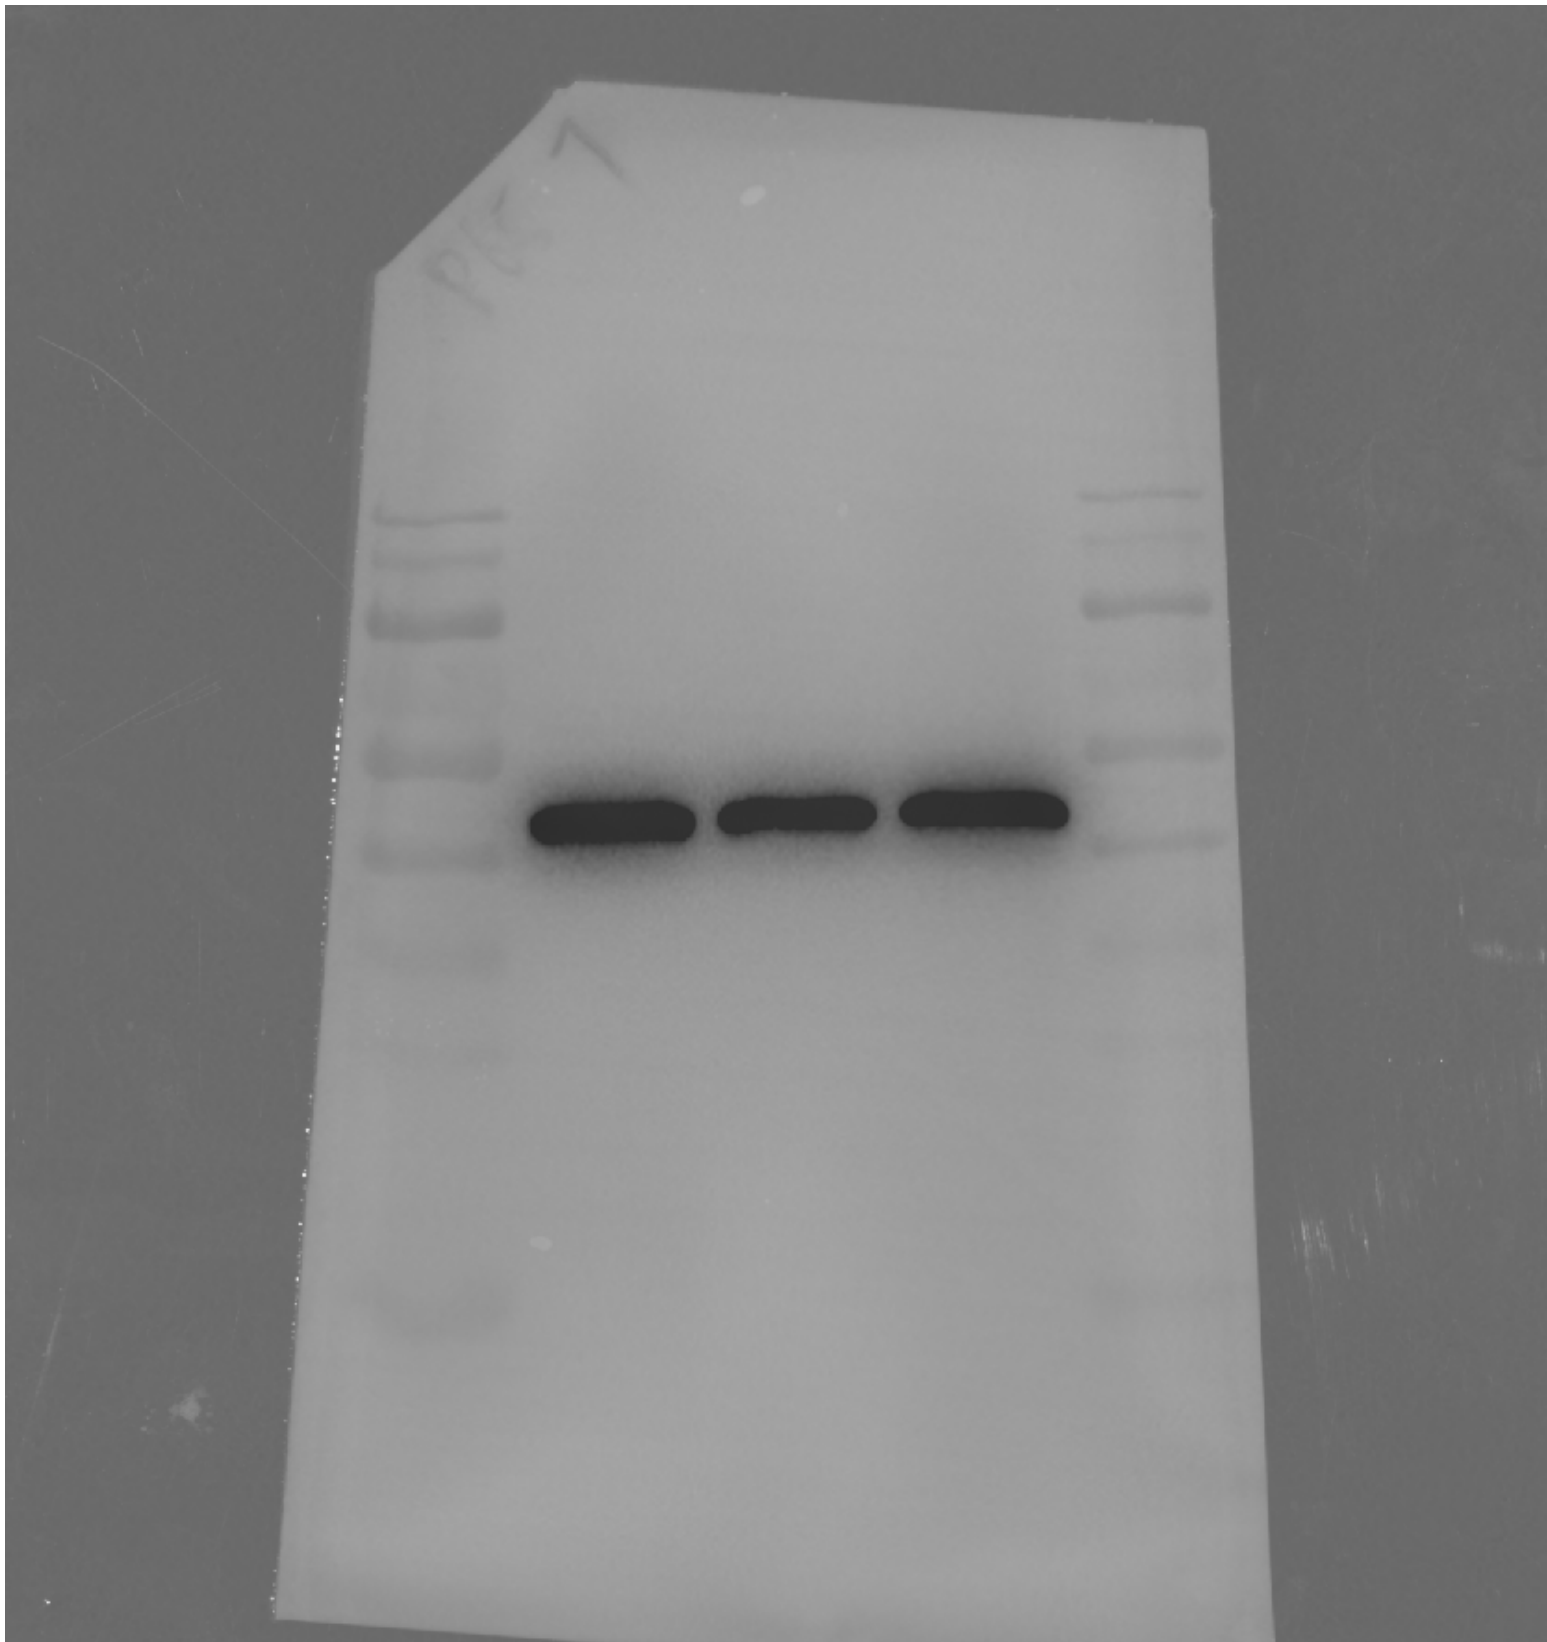

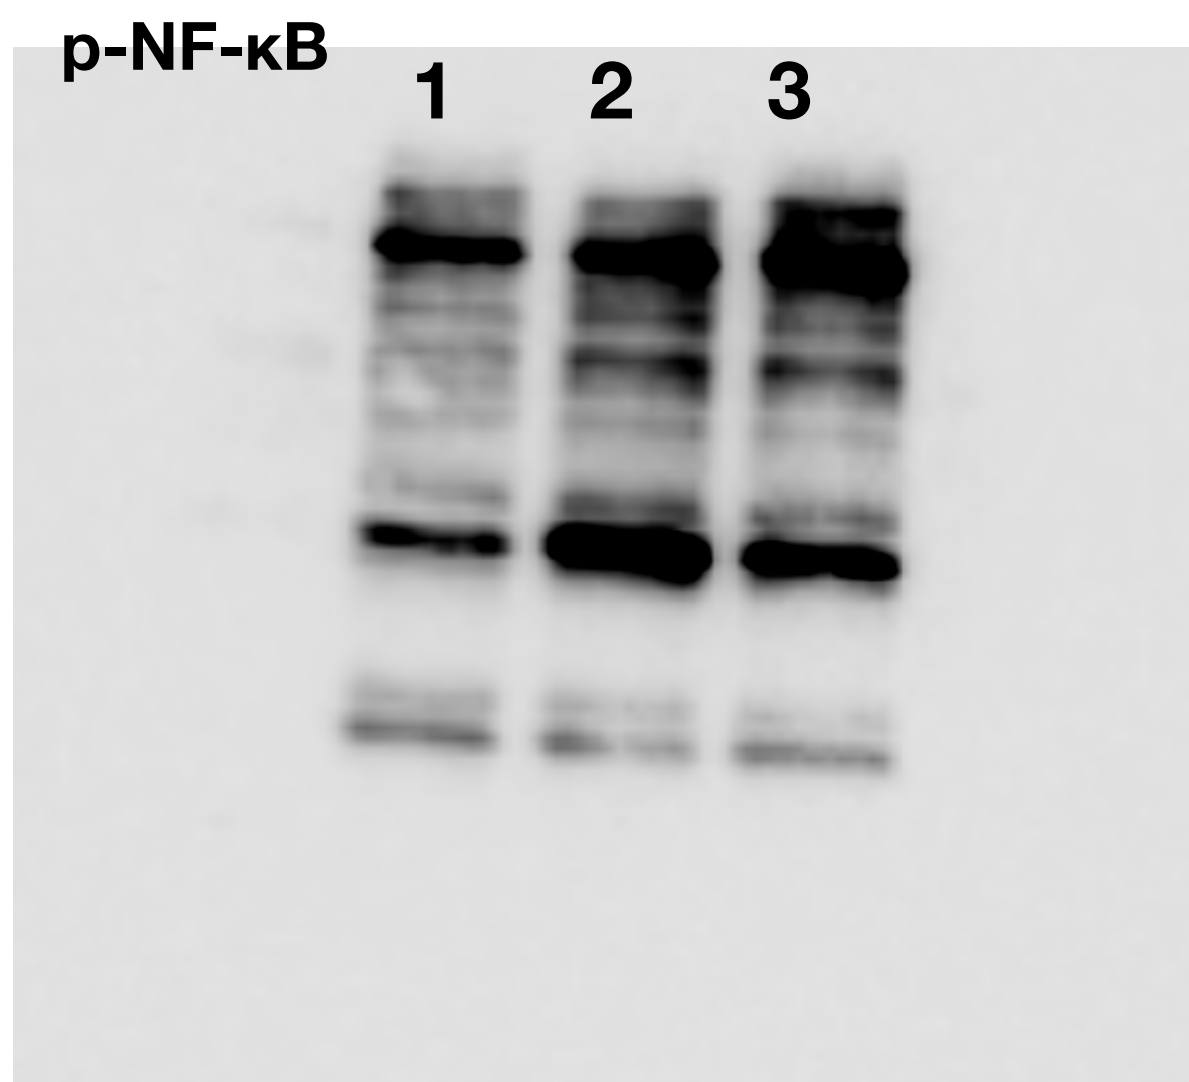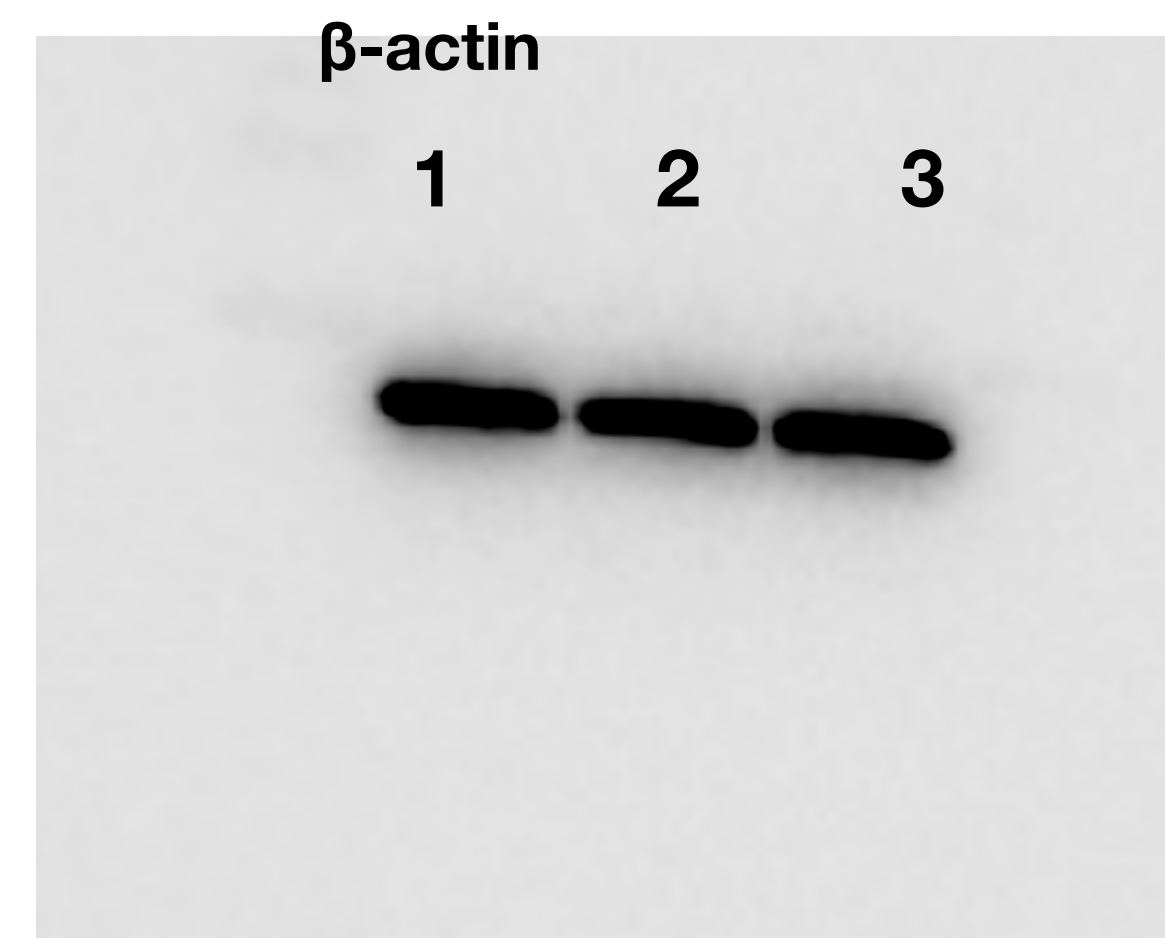

Western blot original bands  
from Figure 6D, Group 2  
bands used for analysis

1 Control  
2 LPS+control siRNA  
3 LPS+MTA1 siRNA

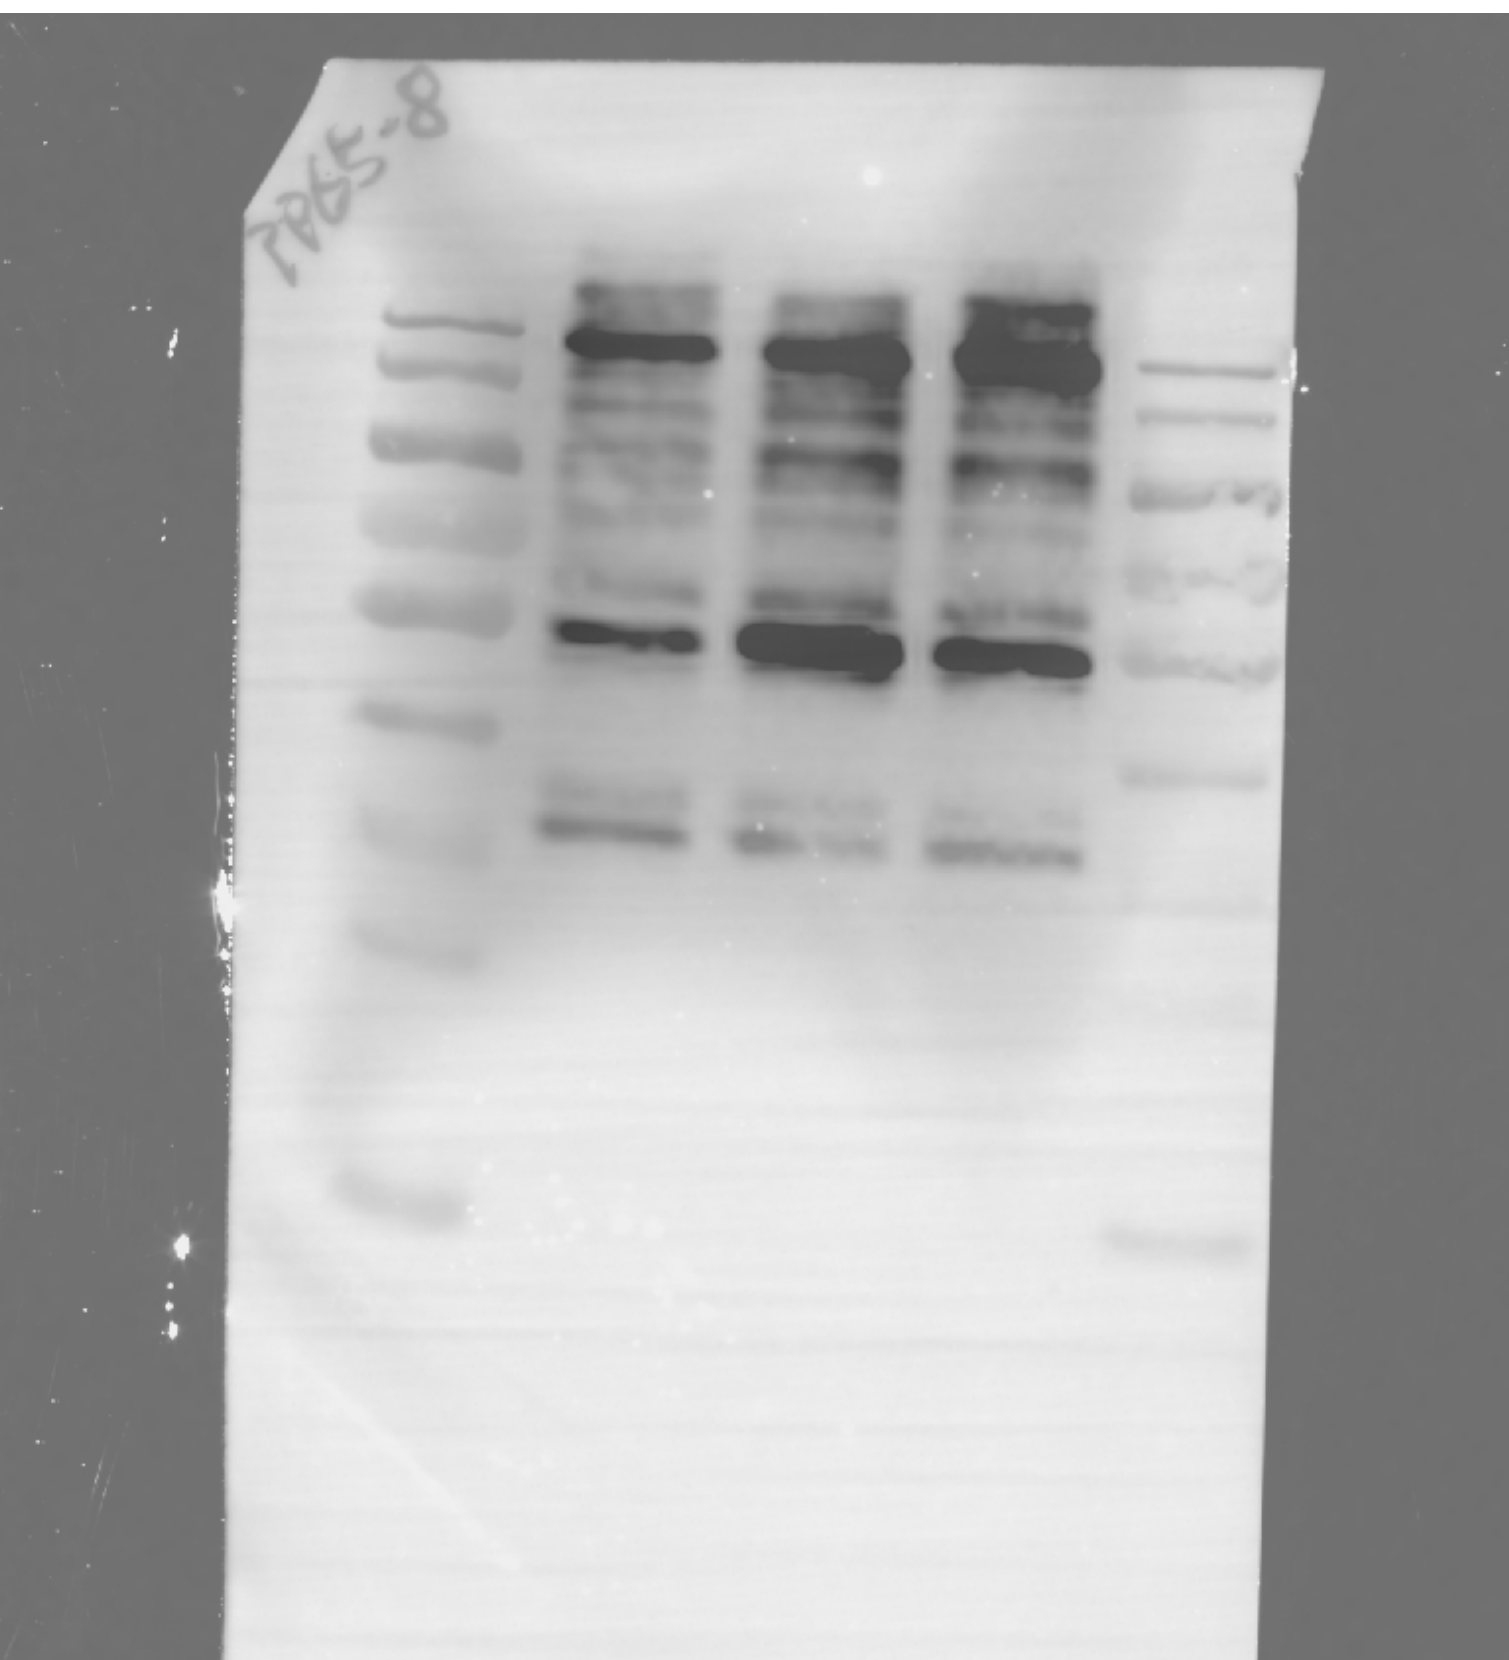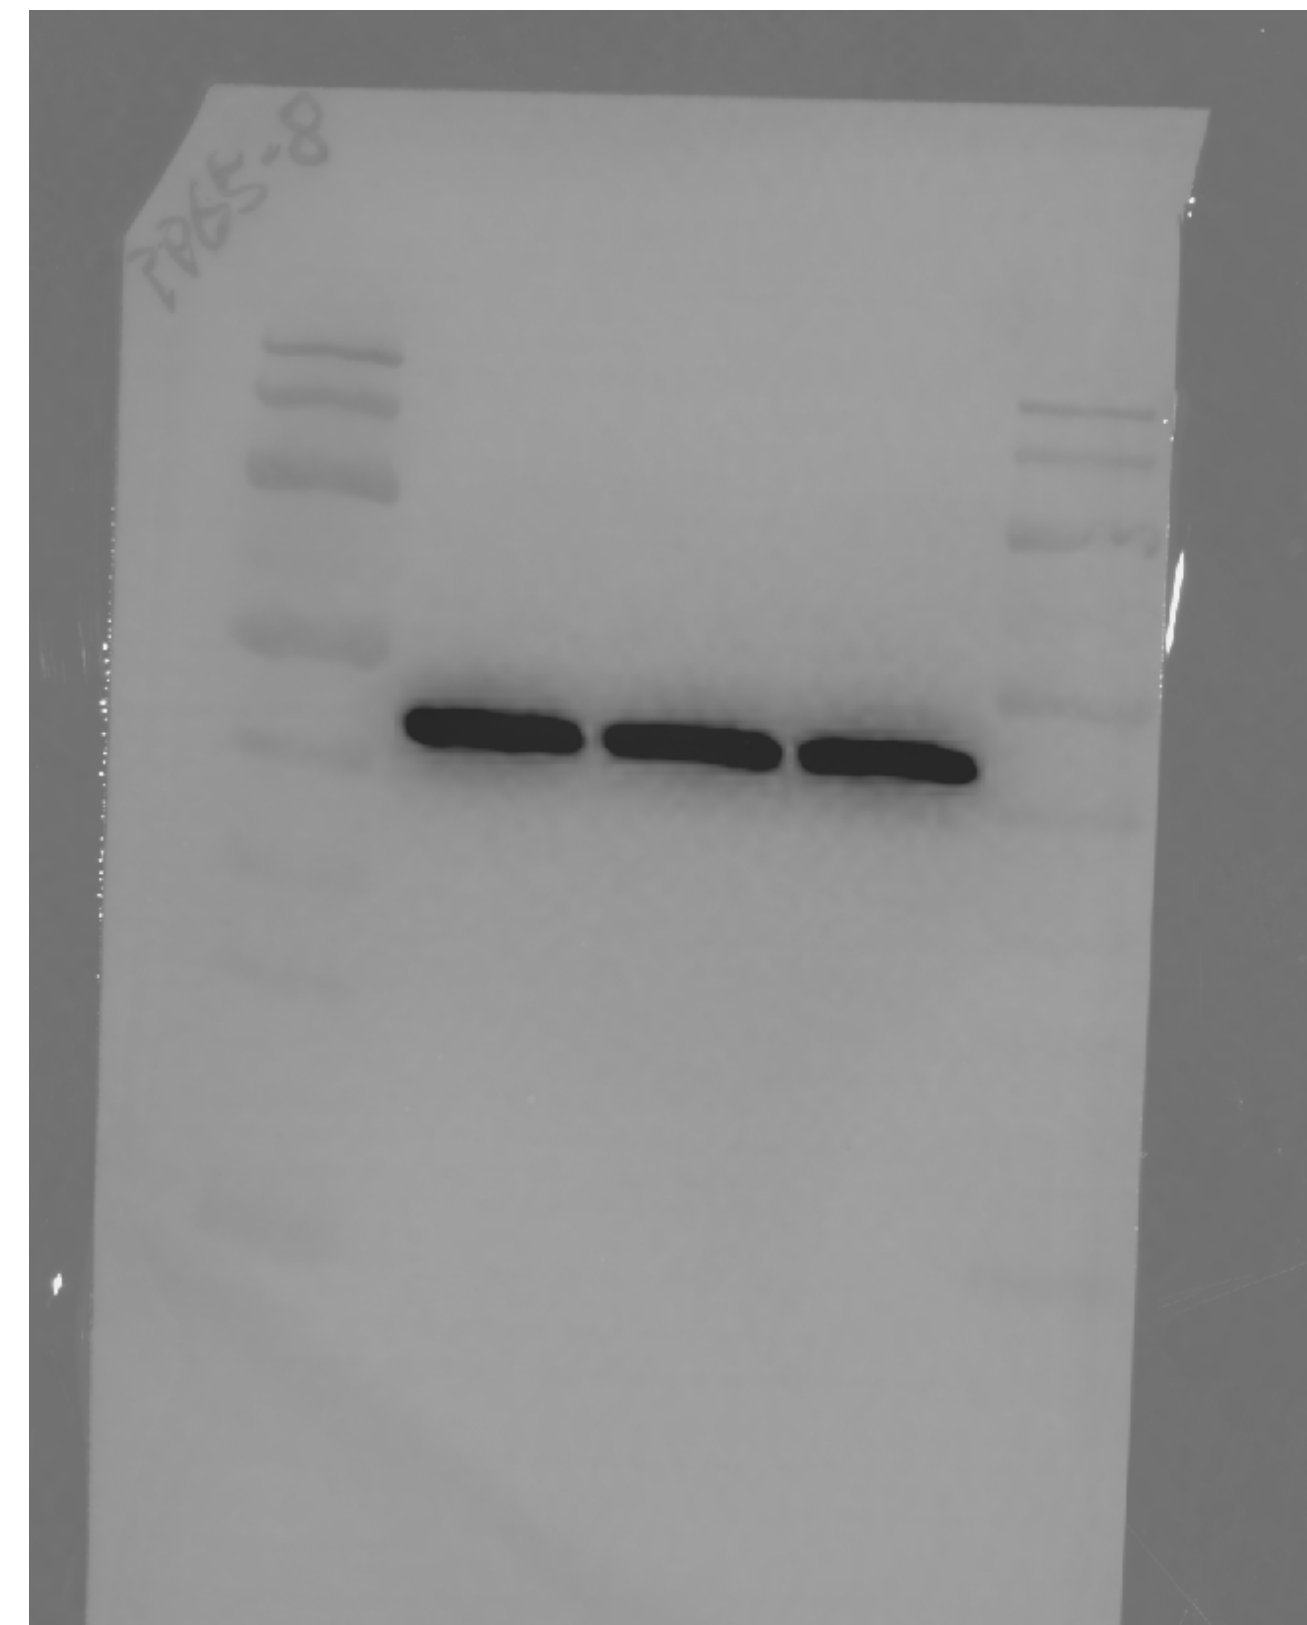

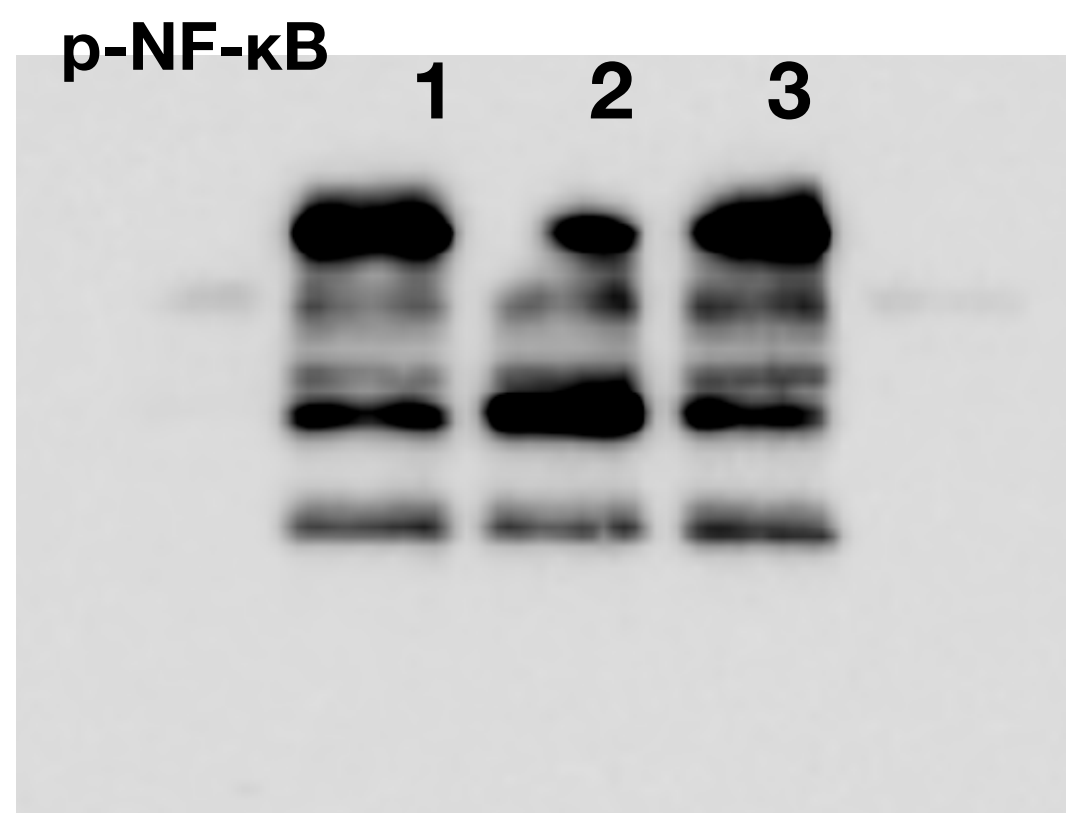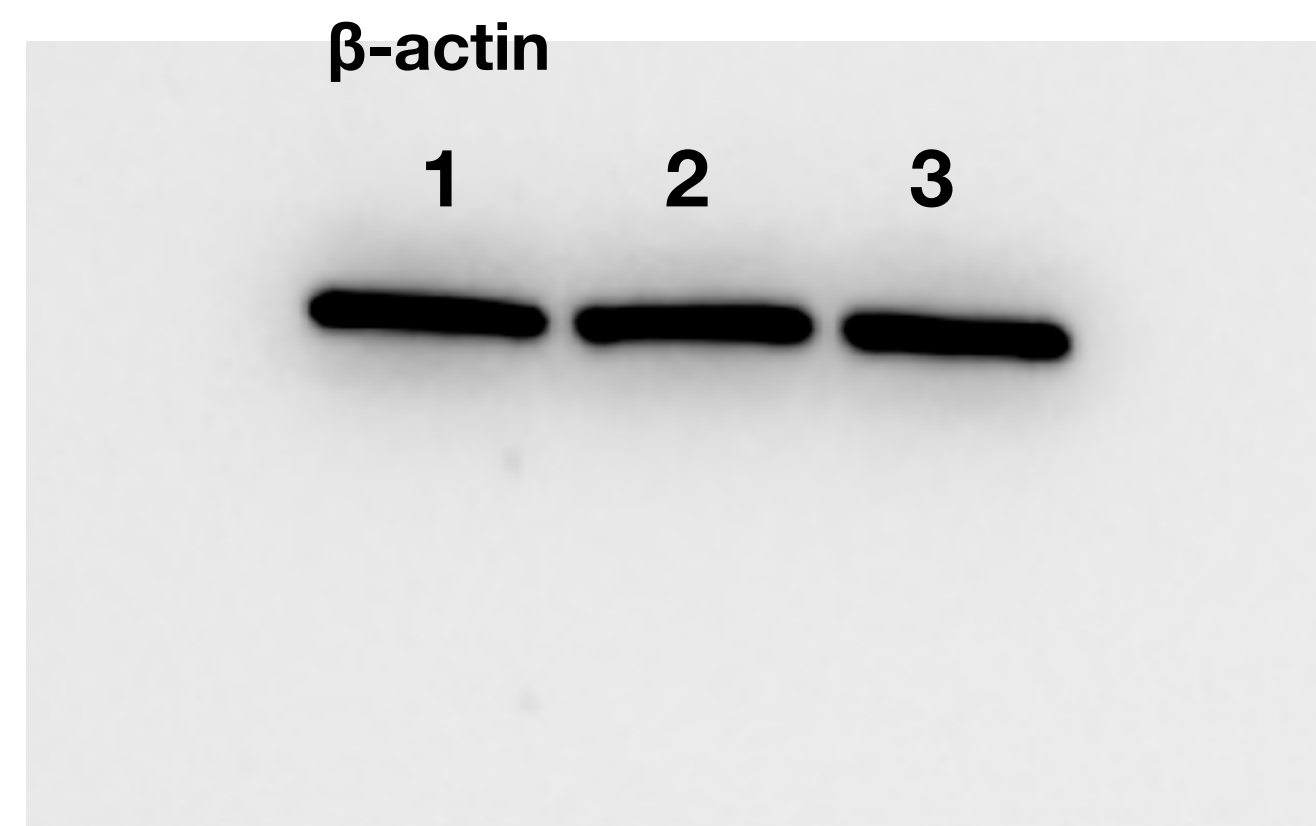

Western blot original bands  
from Figure 6D, Group 3  
bands used for analysis

1 Control  
2 LPS+control siRNA  
3 LPS+MTA1 siRNA

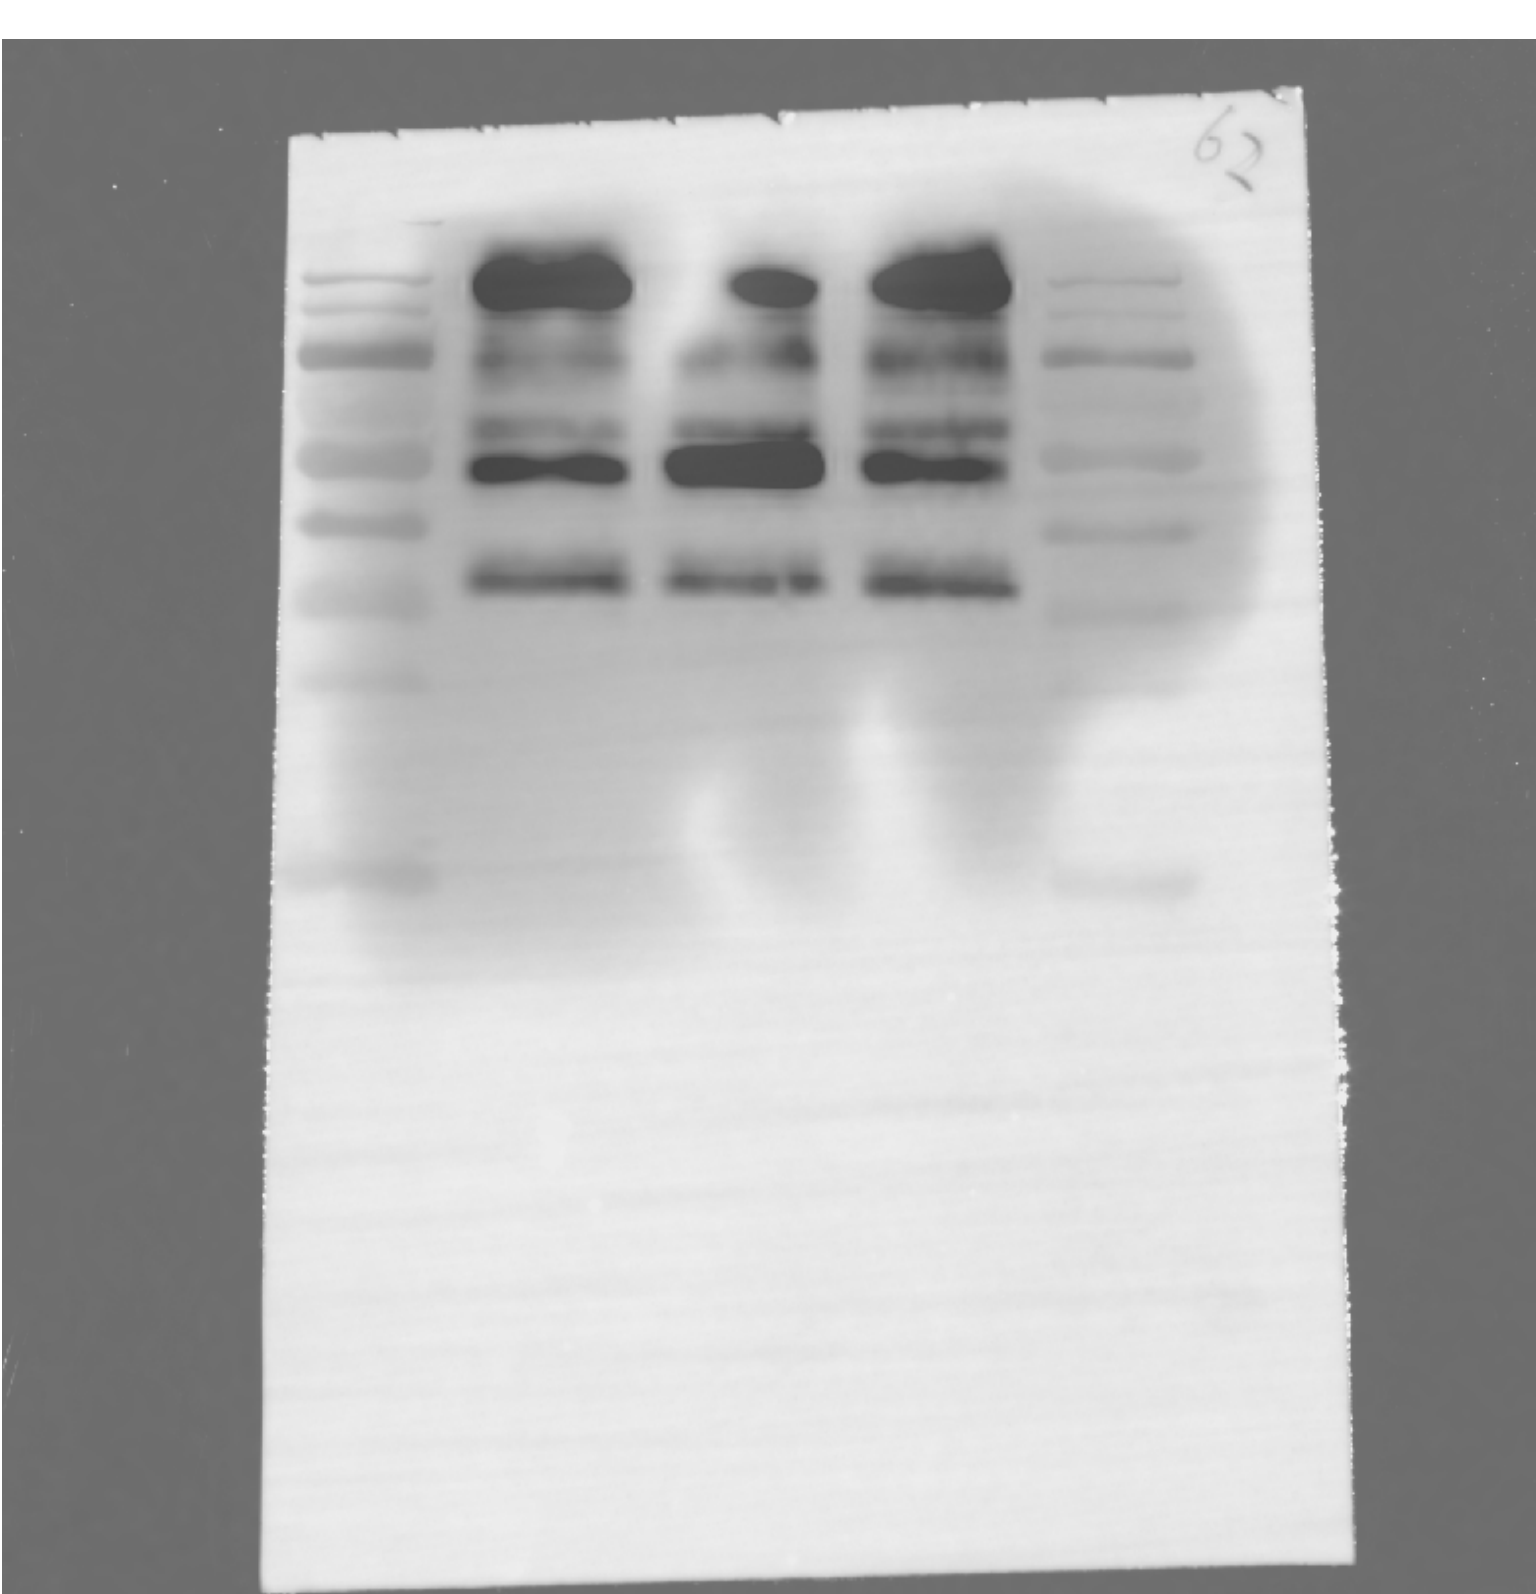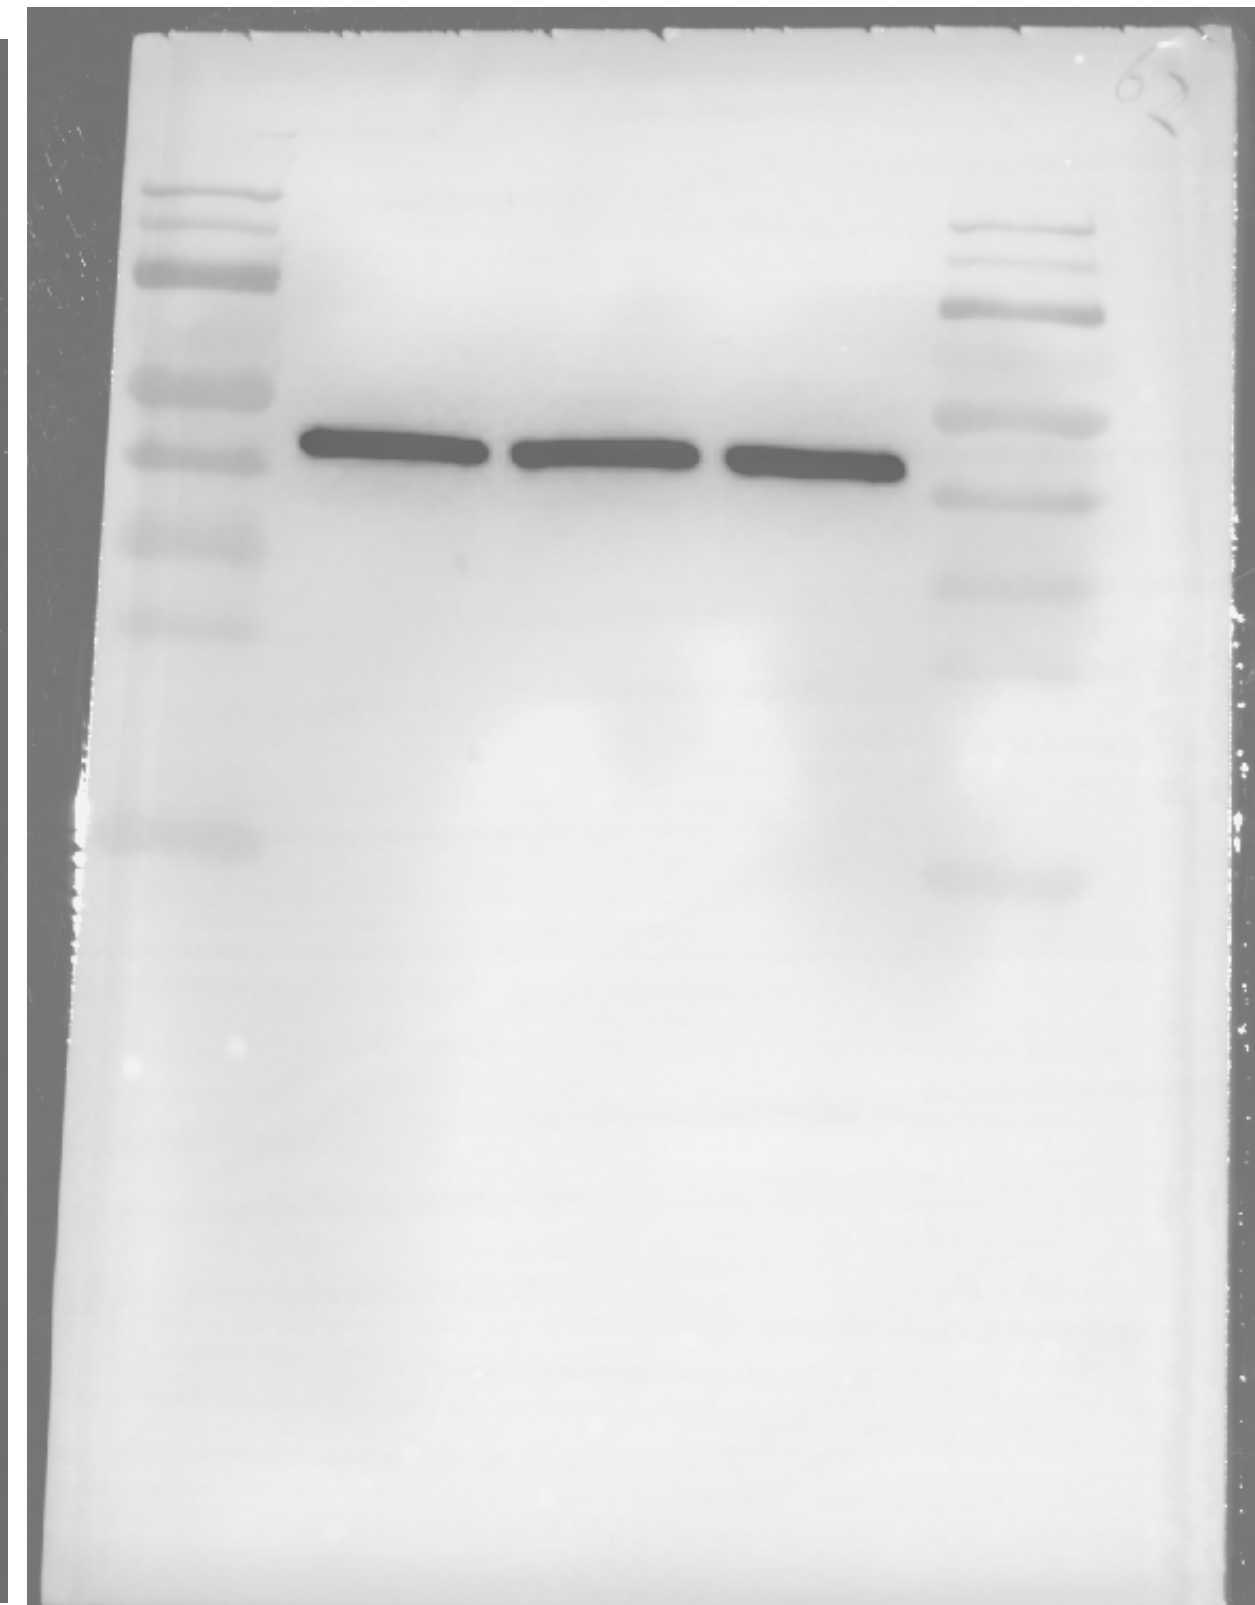

Supplement: s1 [file s1]
