# Supplementary material for: Nicotinic Acid-Mediated Modulation of Metastasis-Associated Protein 1 Methylation and Inflammation in Brain Arteriovenous Malformation
Source: MDPI journal article supplement (doi:10.3390/biom13101495), 2023-10-08
Supplement: s1 [file s1]

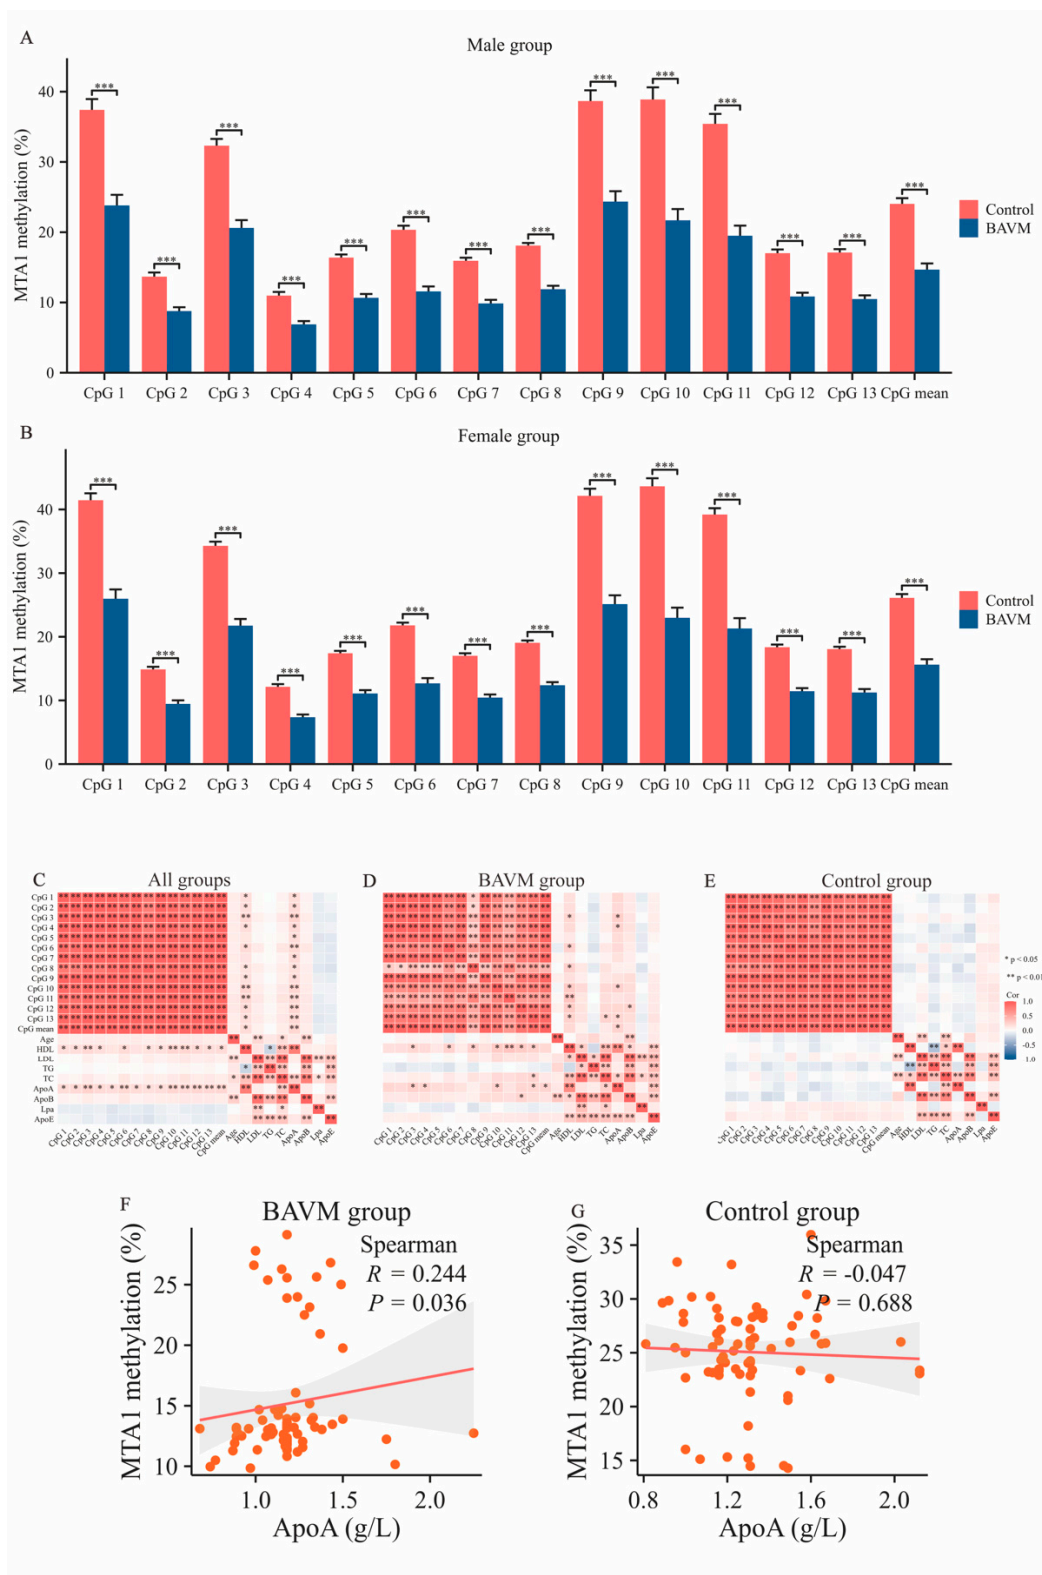

Supplementary Figure S1. Correlation analysis between MTA1 methylation and clinical data.

(A) Differences in methylation between BAVM and controls among males. (B) Differences in methylation between BAVM and controls among females. (C) Correlation analysis in all groups. (D) Correlation analysis in BAVM group. (E) Correlation analysis in Controls. (F) Correlation of MTA1 methylation with APOA in BAVM group. (G) Correlation of MTA1 methylation with APOA in control group. Wilcoxon rank-sum test and spearman correlation analysis were used to analyze data. Results are presented as mean  $\pm$  SEM. \*:  $p < 0.05$ , \*\*:  $p < 0.01$ , \*\*\*:  $p < 0.001$ .

Supplementary Table S1. Usage details of clinical samples in different experimental groups.

| Character             | BAVM | Control | Analysis information                                                                                                                                                                              |
|-----------------------|------|---------|---------------------------------------------------------------------------------------------------------------------------------------------------------------------------------------------------|
| All volunteers        | 74   | 74      | Collection of clinical data including age, sex, smoking, drinking, TG, TC, HDL, LDL, ApoA, ApoB, Lpa, ApoE.<br>Collection of peripheral white blood cells for the DNA methylation pyrosequencing. |
| CTA                   | 23   | N/A     | Collection of computed tomography angiography for analysis.                                                                                                                                       |
| RT-qPCR               | 18   | 18      | Collection of peripheral white blood cells for <i>MTA1</i> mRNA expression.                                                                                                                       |
| ELISA                 | 32   | 32      | Collection of peripheral white blood cells for MTA1 protein expression.                                                                                                                           |
| Cytometric bead array | 50   | 50      | Collection of plasma for inflammatory factor analysis.                                                                                                                                            |

RT-qPCR: Quantitative real-time polymerase chain reactions, CTA: Computed tomography angiography, ELISA: Enzyme-linked immunosorbent assay, TG: Triglycerides, TC: Total cholesterol, HDL: High-density lipoprotein, LDL: Low-density lipoprotein, ApoA: Apolipoprotein A, ApoB: Apolipoprotein B, Lpa: Lipoprotein a, ApoE: Apolipoprotein E, MTA1: Metastasis-associated protein 1.
